# 1 Different complement immune pathways mediate innate anxiety 2 and learned fear 3

4 Laura J. Westacott<sup>1,4†</sup>, Trevor Humby<sup>1,2†</sup>, Niels Haan<sup>1,4</sup>, Sophie A. Brain<sup>2</sup>, Emma-  
5 Louise Bush<sup>2</sup>, Margarita Toneva<sup>2</sup>, Andreea-Ingrid Baloc<sup>2</sup>, Nicola Lander<sup>7</sup>, Anna L.  
6 Moon<sup>1</sup>, Jack Reddaway<sup>1,4</sup>, Michael J. Owen<sup>1</sup>, Jeremy Hall<sup>1,4</sup>, Timothy R. Hughes<sup>3,4</sup>, B.  
7 Paul Morgan<sup>3,4,6</sup>, William P. Gray<sup>1,4,5\$</sup> & Lawrence S. Wilkinson<sup>1,2,4\*\$</sup>

8  
9 <sup>1</sup> Neuroscience and Mental Health Research Institute, MRC Centre for Neuropsychiatric Genetic and  
10 Genomics, School of Medicine, Hadyn Ellis Building, Cardiff University, Cardiff, CF24 4HQ, UK.<sup>2</sup>  
11 Behavioural Genetics Group, Schools of Psychology and Medicine, Cardiff University, Cardiff, CF10  
12 3AT, UK. <sup>3</sup> Complement Biology Group, Systems Immunity Research Institute, School of Medicine,  
13 Cardiff University, CF14 4XW, Cardiff UK. <sup>4</sup> Hodge Centre for Neuropsychiatric Immunology, School of  
14 Medicine, Cardiff University, Cardiff CF24 4HQ, UK. <sup>5</sup> Brain Repair and Intracranial Therapeutics  
15 (BRAIN) Unit, School of Medicine, Cardiff University, CF24 4HQ, UK. <sup>6</sup> UK Dementia Research Institute,  
16 Cardiff University, Cardiff, CF24 4HQ, UK. <sup>7</sup> School of Biosciences, Cardiff University, Cardiff, CF10  
17 3AT, UK.  
18

19 † These authors contributed equally to the work

20 \$Joint senior authors: Lawrence S. Wilkinson & William P. Gray

21  
22 \*Corresponding author: Lawrence S. Wilkinson

23  
24 Email address: [WilkinsonL@cardiff.ac.uk](mailto:WilkinsonL@cardiff.ac.uk)

25  
26 Address: Neuroscience and Mental Health Research Institute, School of Medicine,  
27 Cardiff University, Cardiff, CF24 4HQ, UK  
28

29 **Key words:** *Neuroimmunology, Behaviour, Complement system, Anxiety, Fear,*  
30 *Stress response.*  
31  
32  
33  
34  
35  
36  
37  
38  
39  
40  
41

## Abstract

42  
43  
44  
45  
46  
47  
48  
49  
50  
51  
52  
53  
54  
55  
56  
57  
58  
59  
60  
61  
62  
63  
64  
65  
66  
67

Complement is a key component of the immune system with roles in inflammation and host-defence. Here we reveal unanticipated functions of complement pathways impacting on emotional reactivity of relevance to the emerging links between complement and risk for psychiatric disorder. We used mouse models to assess the effects of manipulating components of the complement system on emotionality. *C3aR*<sup>-/-</sup> mice demonstrated a selective increase in unconditioned (innate) anxiety whilst *C3*<sup>-/-</sup> mice showed a selective increase in conditioned (learned) fear. The dissociable behavioural phenotypes were linked to different signalling mechanisms. Effects on innate anxiety were independent of C3a, the canonical ligand for C3aR, indicating the existence of an alternative ligand mediating innate anxiety, whereas effects on learned fear were due to loss of iC3b/CR3 signalling. Our findings show that specific elements of the complement system and associated signalling pathways contribute differentially to heightened states of anxiety and fear commonly seen in psychopathology.

68 The complement system is a key component of the immune system that plays a pivotal  
69 role in inflammation and host-defence. Complement activation occurs via several  
70 pathways, all of which lead to cleavage of the central protein, C3 (see Figure S1).  
71 Activation of C3 generates the fragments C3a and C3b. C3a is an anaphylatoxin that  
72 signals via its canonical G-protein coupled receptor C3aR<sup>1</sup>. Activation of this receptor  
73 has been demonstrated to trigger calcium mobilization<sup>2-4</sup>, stimulating an array of  
74 intracellular signalling pathways to induce both pro- and anti-inflammatory effects<sup>1,5</sup>.  
75 C3b on the other hand propagates further complement activation by contributing to the  
76 cleavage of complement component 5 (C5) downstream of C3 and, after further  
77 cleavage to iC3b, plays a role in opsonisation by macrophages and microglia via  
78 complement receptor 3 (CR3). Akin to C3, C5 cleavage generates C5a (another  
79 anaphylatoxin and a ligand for the C5a receptor, C5aR) and C5b, which triggers the  
80 terminal complement pathway by sequentially binding proteins C6, C7, C8 and C9.  
81 These proteins subsequently congregate to assemble the membrane attack complex  
82 (MAC) which ultimately results in destruction of the target cell or pathogen via cell  
83 lysis<sup>6</sup>.

84

85 In the central nervous system evidence is emerging that complement has functions  
86 beyond its canonical immune roles<sup>7</sup>. Neurons, astrocytes and microglia express  
87 complement receptors and regulators, and are also capable of synthesising  
88 complement proteins<sup>8,9</sup>. The expression patterns of these vary over the course of brain  
89 development<sup>10</sup>. Complement impacts a number of neurodevelopmental processes  
90 including neurogenesis<sup>11</sup>, migration<sup>12</sup> and synaptic pruning<sup>13</sup> as well as ongoing  
91 synaptic plasticity processes underlying learning and memory in the adult brain<sup>14</sup>.  
92 Furthermore, there is increasing evidence that complement is causally involved in the

93 pathogenesis of neurodegenerative and psychiatric conditions. In Alzheimer's  
94 disease, genetic variants in complement related loci have been associated with  
95 increased disease risk<sup>15,16</sup>, and complement knockout mice exhibit reduced age-  
96 related synapse loss<sup>17</sup> and neuropathology<sup>18</sup>. Alterations in complement proteins and  
97 activation have also been reported in sera from individuals with autism-spectrum  
98 disorder<sup>19</sup> schizophrenia<sup>20</sup>, major depressive disorder<sup>21</sup>, bipolar disorder<sup>22</sup> and post-  
99 traumatic stress disorder<sup>23</sup>.

100

101 In the case of schizophrenia, an important finding comes from elegant genetic work  
102 demonstrating that structural variation in the *C4* locus is associated with risk of  
103 developing the disease<sup>24</sup>. *C4* cleavage generates fragments that contribute to the  
104 activation of *C3*, yielding *C3a* and *C3b*. Given the known roles for the *iC3b/CR3*  
105 pathway in developmental synaptic pruning<sup>13,25</sup>, it has been suggested that *C4*  
106 variants may impact on psychiatric risk via this mechanism, with excessive synaptic  
107 elimination leading to abnormal connectivity and disruption of neural networks<sup>24</sup>.  
108 Variants in *C3* and putative complement-control genes *CSMD1* and *CSMD2* have also  
109 been implicated in genetic susceptibility for schizophrenia<sup>26,27</sup>.

110

111 Altered emotional function, in particular maladaptive anxiety and fear, is a pervasive  
112 and clinically important symptom that is comorbid across several of the DSM-5 and  
113 ICD-11 defined disorders in which complement has been implicated. Anxiety and fear  
114 are distinct aversive states elicited by differing environmental factors, that result in  
115 distinguishable behavioural outputs<sup>28</sup>. Anxiety is characterised by sustained arousal,  
116 hypervigilance and risk assessment surrounding anticipated or potential threats, while  
117 fear is an acute response to an experienced, imminent danger resulting in immediate

118 avoidance, fight or freezing behaviour<sup>29,30</sup>. Whilst there is significant overlap in the  
119 neurocircuitry underlying these states, there are also contributions from distinct  
120 neuronal circuitries<sup>28,31</sup>. Although links between anxiety and inflammation have been  
121 documented<sup>32</sup>, there has been little investigation of the specific role of complement in  
122 either anxiety or fear. In animal models, anxiety phenotypes arise from heightened  
123 pre-natal complement activity<sup>33</sup> and complement inhibitors reduce anxiety associated  
124 with neurodegeneration<sup>34</sup>. Furthermore, aged C3 deficient mice exhibited lower levels  
125 of anxiety alongside enhanced contextual fear responses<sup>17</sup>. These latter studies  
126 suggest that complement can influence both innate and learned components of  
127 aversive behaviours, however, the precise relationship between signalling within  
128 discrete pathways of the complement system and their relationship to dissociable  
129 aspects of emotionality and underlying brain function is unknown.

130

131 Utilising the central role of C3 in complement signalling, we used a combination of  
132 complement knockout mice to functionally parse anxiety and fear related phenotypes.  
133 In homozygous C3 knockout mice ( $C3^{-/-}$ )<sup>35</sup> complement cannot be activated beyond  
134 C3, and therefore these animals lack C3 activation fragments (C3a, C3b) and  
135 downstream activation products (C5a, C5b) and thus cannot activate the terminal  
136 complement pathway. Phenotypes in this model could therefore be the result of loss  
137 of any of these downstream effector molecules. We compared the  $C3^{-/-}$  model with  
138 homozygous  $C3aR$  knockout mice ( $C3aR^{-/-}$ )<sup>36</sup>. In these mice, complement is intact  
139 apart from the capacity for C3a to bind its canonical receptor C3aR and hence we  
140 tested the extent to which phenotypic effects were the result specifically of disrupted  
141 C3a/C3aR signalling. A priori, because C3a is an obligate cleavage fragment of C3,

142 we hypothesised that any phenotypes dependent on the binding of C3a to C3aR would  
143 be apparent in both *C3<sup>-/-</sup>* and *C3aR<sup>-/-</sup>* models.

144

145 Contrary to our hypotheses we found clear phenotypic dissociations between the *C3<sup>-/-</sup>*  
146 *<sup>-/-</sup>* and *C3aR<sup>-/-</sup>* models which were dependent on the nature of the emotional behaviour.

147 *C3aR<sup>-/-</sup>* mice displayed a profound innate anxiety phenotype that was lacking in the

148 *C3<sup>-/-</sup>* model. In contrast, when we examined learned fear, where a previously neutral

149 cue generates a fear response as a result of predicting an aversive outcome, we found

150 that the dissociation was reversed with the *C3<sup>-/-</sup>* mice exhibiting an enhanced fear

151 response to a conditioned cue, but no differences between wildtype and *C3aR<sup>-/-</sup>* mice.

152 This observed double dissociation in emotionality was linked to distinct underlying

153 complement signalling mechanisms, with anxiety phenotypes in C3aR mice likely to

154 be independent of C3a/C3aR signalling raising the possibility of an alternative ligand

155 for C3aR, and *C3<sup>-/-</sup>* effects on learned fear the result of alterations in iC3b-CR3

156 pathway activity. These findings point to a hitherto unrecognized complexity of

157 complement effects on brain function and behaviour of relevance to emotional

158 dysfunction in psychopathology.

159

## 160 **Results**

### 161 **Increased innate anxiety in *C3aR<sup>-/-</sup>* but not *C3<sup>-/-</sup>* mice**

162 Full details of the complement knockout models used can be found in the Methods.

163 Using a cohort of male wildtype, *C3<sup>-/-</sup>* and *C3aR<sup>-/-</sup>* mice we first assessed emotional

164 reactivity in the elevated plus maze (EPM), a well-established test of innate anxiety in

165 rodents which exploits the conflict between the drive to explore novel environments

166 and the innate aversion towards open, brightly lit spaces<sup>37,38</sup>. Heatmaps indexing

167 overall maze exploration over a 5-minute session demonstrated major differences in  
168 open arm exploration between genotypes (Figure 1A; see Supplementary Video 1 for  
169 representative examples). Notably, in comparison to wildtype and  $C3^{-/-}$  mice,  $C3aR^{-/-}$   
170 mice took significantly longer to first enter the open arms (Figure 1B) and spent less  
171 time on the open arm per entry (Figure S2A), leading to a reduced overall duration  
172 spent in the open arms (Figure 1C), findings consistent with increased anxiety. The  
173 ethological parameters head dips and stretch attend postures (SAPs) also differed  
174 between genotypes (Figure 1D,E), with  $C3aR^{-/-}$  mice exhibiting decreases in the  
175 former and increases in the latter, a pattern of results again consistent with heightened  
176 anxiety<sup>39</sup>. We also noted a significantly increased frequency of head dipping in  $C3^{-/-}$   
177 mice (Figure 1D), consistent with reduced levels of anxiety relative to both wildtype  
178 and  $C3aR^{-/-}$  mice<sup>40</sup>.

179

180 These initial data were consistent with an anxiogenic phenotype present in  $C3aR^{-/-}$   
181 mice but absent in  $C3^{-/-}$  mice. We confirmed the findings in two further independent  
182 tests of anxiety using additional cohorts of animals. First we used the elevated zero  
183 maze (EZM, see Methods), another test of anxiety-like behaviour which similarly  
184 probes behavioural responses to exposed, illuminated spaces<sup>41</sup>. The data  
185 recapitulated the pattern of findings seen in the EPM (Figure 1F-J). Additional data  
186 from the open field test, where  $C3aR^{-/-}$  mice were more likely to avoid the centre of the  
187 arena, were also consistent in demonstrating a specific anxiety-like phenotype in  
188  $C3aR^{-/-}$  but not  $C3^{-/-}$  mice (Figure S3). Given that several of the measures indexing  
189 anxiety were dependent on movement around the apparatus it was important to  
190 eliminate potential locomotor confounds. To address this issue, we measured activity  
191 independently in a non-anxiety provoking environment and found no differences in

192 locomotor activity between genotypes (Figure S2C), demonstrating that anxiety  
193 measures were not influenced by movement confounds.

194

195 **Neuroendocrine response and neuronal activation in *C3aR*<sup>-/-</sup> and *C3*<sup>-/-</sup> mice**  
196 **following exposure to the elevated plus maze**

197 We next tested whether the behavioural measures of anxiety were paralleled by  
198 changes in plasma levels of the stress hormone corticosterone. In a separate cohort  
199 of wildtype, *C3*<sup>-/-</sup> and *C3aR*<sup>-/-</sup> mice, we assayed plasma corticosterone 30 minutes after  
200 exposure to the EPM and compared levels to those of a group of animals who  
201 remained in their home-cages. There were no genotype differences in basal  
202 corticosterone levels; however, being placed on the EPM increased plasma  
203 corticosterone 6-15-fold in all genotypes, demonstrating that the EPM was a potent  
204 stressor (Figure 2A). *Post hoc* analyses showed a significantly greater EPM-evoked  
205 corticosterone response in the *C3aR*<sup>-/-</sup> animals, consistent with their increased  
206 anxiety-like behaviour observed on the maze.

207

208 Neuronal activity within the ventral hippocampus (vHPC) has been linked to anxiety in  
209 rodents<sup>42,43</sup> therefore we also investigated mRNA expression of two immediate early  
210 genes (IEGs), *c-Fos* and *zif268*, in a further cohort of behaviourally naïve wildtype,  
211 *C3*<sup>-/-</sup> and *C3aR*<sup>-/-</sup> animals. There were no effects on *zif268* expression but 5-minute  
212 exposure to the EPM was found to significantly increase *c-Fos* expression 30 minutes  
213 later, compared to animals who remained in their home-cages (Figure 2B). In wildtype  
214 animals there was a 4.95-fold increase in *c-Fos* expression over baseline and  
215 increases in EPM-evoked *c-Fos* expression in *C3*<sup>-/-</sup> and *C3aR*<sup>-/-</sup> models of 7.77-fold  
216 and 6.54-fold, respectively (Figure 2B). Thus, whilst being placed on the EPM led to



217 significant general increases in *c-Fos* in vHPC, the enhanced activity seen in the  
218 knockout models did not differentiate between *C3<sup>-/-</sup>* and *C3aR<sup>-/-</sup>* and did not predict the  
219 observed dissociations in anxiety-related behaviours.

220

221 **Altered sensitivity of *C3aR<sup>-/-</sup>* and *C3<sup>-/-</sup>* mice to diazepam in the elevated plus maze**

222 In a further independent cohort of animals, we tested the sensitivity of EPM induced  
223 anxiety-like behaviour to the benzodiazepine diazepam, an established clinically  
224 effective anxiolytic drug<sup>37,44</sup>. Our initial behavioural findings were replicated in vehicle-  
225 treated animals across all behavioural indices of anxiety, again showing an anxiogenic  
226 phenotype in *C3aR<sup>-/-</sup>* but not *C3<sup>-/-</sup>* mice (Figure 3A). As anticipated, in wildtype mice  
227 2mg/kg diazepam led to a trend for increased time on the open arms (Figure 3B) and  
228 a significant reduction in SAPs which are considered to reflect risk assessment  
229 behaviour<sup>45-47</sup>(Figure 3C). These effects were therefore consistent with reduced  
230 anxiety<sup>40,47</sup>. In contrast, the same dose of drug that was effective in eliciting anxiolysis  
231 in wildtypes was without effects in *C3aR<sup>-/-</sup>* mice (Figure 3A,B,C) and produced a  
232 seemingly anxiogenic (increased anxiety) pattern of effects in *C3<sup>-/-</sup>* mice (Figure 3A,B  
233 and Figure S4B,C). Locomotor activity monitored across all the maze (Figure S4D)  
234 indicated that wildtype and *C3aR<sup>-/-</sup>* mice were unlikely to have been influenced by  
235 diazepam-induced sedation. In *C3<sup>-/-</sup>* mice however, activity was significantly  
236 suppressed under drug conditions indicating a possible sedative effect. Together,  
237 these data indicated a fundamentally altered reactivity to diazepam in both *C3<sup>-/-</sup>* and  
238 *C3aR<sup>-/-</sup>* models.

239

240

241

242 **Enhanced fear learning in  $C3^{-/-}$  but not  $C3aR^{-/-}$  mice**

243 Psychiatric disorders are associated with maladaptive responses to both innate,  
244 unconditioned and learned aversive stimuli<sup>48,49</sup>. We therefore extended our analysis  
245 to investigate whether the behavioural dissociations in innate anxiety observed  
246 between  $C3^{-/-}$  and  $C3aR^{-/-}$  mice would also apply to learned or conditioned fear, where  
247 a previously neutral cue generates a fear response as a result of predicting an aversive  
248 outcome. In a further group of animals, we used the fear-potentiated startle (FPS)  
249 paradigm<sup>30,50</sup> a well-established method of generating learned fear responses to an  
250 acute and imminent danger signal that is characteristic of fear. In this paradigm (see  
251 Figure 4A and Methods) fear learning is indexed by an enhanced response to a  
252 startling noise in the presence of a cue (the conditioned stimulus or CS) previously  
253 paired with mild foot shock (the unconditioned stimulus). In the pre-conditioning  
254 session, pulse-alone trials revealed increased basal startle reactivity in both  $C3aR^{-/-}$   
255 and  $C3^{-/-}$  animals relative to wildtype (Figure 4B). Increased reactivity to the  
256 unconditioned foot shock stimulus (in the absence of any startle stimulus) during the  
257 conditioning session was also observed in both knockouts (Figure 4C). However,  
258 these common effects of genotype were not seen in the fear-potentiated startle  
259 measures which index fear learning. Whilst all groups showed the expected  
260 enhancement of the startle response in the presence of the CS, the effect of the CS  
261 was significantly greater in  $C3^{-/-}$  animals relative to the  $C3aR^{-/-}$  and wildtype animals  
262 (Figure 4D), indicating enhanced learning of the fear related-cue by the  $C3^{-/-}$  mice.  
263 This was the opposite pattern of effects to those observed in the tests of innate anxiety  
264 and showed a double dissociation in the impact of manipulating C3 and C3aR function  
265 that depended fundamentally on the nature of the aversion.

266

267 **Complement signalling pathways underlying abnormal learned fear phenotypes**  
268 **in  $C3^{-/-}$  mice**

269 Given the central role of C3 within the complement system, its deletion affects a  
270 number of distal pathways (Figure 5A), with the activity of the C3a/C3aR, C3b/CR3,  
271 C5a/C5aR and terminal pathways affected. Therefore, the loss of function of any of  
272 these pathways may have contributed to the observed fear learning phenotype in  $C3^{-/-}$   
273  $^{-/-}$  mice. However, it is possible to exclude effects due to loss of the C3a/C3aR pathway  
274 since the fear learning phenotype was specific to  $C3^{-/-}$  and not  $C3aR^{-/-}$  mice (Figure  
275 4D). This left iC3b/CR3 signalling and/or pathways downstream of C5 (i.e. C5a/C5aR,  
276 terminal pathway) as the remaining possibilities. In order to distinguish between these  
277 pathways, we repeated the FPS experiment with the addition of  $C5^{-/-}$  mice. This model  
278 has intact C3a/C3aR and iC3b/CR3 signalling, but lacks C5a/C5b and terminal  
279 pathway activity, as do  $C3^{-/-}$  mice. We hypothesised that if  $C5^{-/-}$  mice also displayed  
280 enhanced fear-potentiated startle, then the phenotype in  $C3^{-/-}$  mice would likely be due  
281 to a loss of C5a/C5aR signalling or the terminal pathway. On the other hand, if  $C5^{-/-}$   
282 mice demonstrated normal fear-potentiated startle, this would confine the likely  
283 mediating pathway in  $C3^{-/-}$  mice to iC3b/CR3 signalling.

284

285 Results from the pre-conditioning session demonstrated increases in the startle  
286 response of  $C5^{-/-}$  mice, (Figure 5B) although in this instance the previously observed  
287 enhanced startle reactivity in  $C3^{-/-}$  mice (Figure 4B) was not replicated. In the  
288 conditioning session, there was again evidence of increased startle responses to  
289 shock (Figure 5C) in  $C3^{-/-}$  mice and responses were of a similar magnitude in  $C5^{-/-}$   
290 mice, although these were not significantly different to wildtype. We replicated the  
291 previous finding of enhanced fear-potentiated startle in  $C3^{-/-}$  mice (Figure 5D), but

292 critically  $C5^{-/-}$  mice showed no evidence of enhanced fear learning and were  
293 comparable to wildtypes, indicating that loss of iC3b/CR3 signalling, but not loss of  
294 C5a/C5aR and the terminal pathway, was involved in the  $C3^{-/-}$  fear learning phenotype.  
295 Additionally, we did not observe innate anxiety-like phenotypes in  $C5^{-/-}$  mice (Figure  
296 S5).

297

298 This pattern of effects allowed us to distinguish between the likely mechanisms  
299 underlying the enhanced learned fear in  $C3^{-/-}$  mice, as we could exclude concomitant  
300 loss of C5a/C5aR signalling or molecules downstream of C5, and hence also exclude  
301 an explanation based on effects of C5a/C5aR signalling on developmental  
302 neurogenesis<sup>51,52</sup>. Instead, these data raised the possibility of an explanation based  
303 on the established effects of the iC3b/CR3 pathway on synaptic pruning, a mechanism  
304 involving microglia mediated elimination of synapses impacting on neurodevelopment  
305 and learning-related synaptic plasticity<sup>13,14,53</sup>.

306

### 307 **Differential expression of stress and anxiety related genes in $C3aR^{-/-}$ and $C3^{-/-}$** 308 **mice**

309 We next sought to assess whether the dissociations in innate anxiety and learned fear  
310 between  $C3aR^{-/-}$  and  $C3^{-/-}$  models were associated with differential gene expression in  
311 brain regions associated with emotional behaviours. We assayed gene expression in  
312 three regions with known roles in stress and anxiety; the medial prefrontal cortex  
313 (mPFC), ventral hippocampus (vHPC) and cerebellum<sup>28,54</sup>(Figure 6A). Given our  
314 previous data showing differential corticosterone responses and altered sensitivity to  
315 diazepam in both knockouts, we first measured expression of the glucocorticoid  
316 receptor *Nr3c1* and the corticotrophin-releasing hormone receptor 1 *Crhr1*, together  
317 with *Gabra2* which encodes the GABA<sub>A</sub> receptor  $\alpha 2$  subunit responsible for mediating

318 benzodiazepine anxiolysis<sup>55</sup>. There were no effects of genotype on *Crhr1* and *Gabra2*  
319 mRNA expression in any of the brain regions assayed (Figure 6B,C). *Nr3c1*  
320 expression did however show effects of genotype with strong trends indicating specific  
321 increases in *C3aR*<sup>-/-</sup> mice in mPFC and vHPC and significantly increased expression  
322 in cerebellum that was common to both knockouts (Figure 6D). As activation of C3aR  
323 has been shown to stimulate calcium influx from the extracellular space<sup>2-4,56,57</sup> and  
324 calcium channel subunit variants have strong links to risk for psychiatric and  
325 neurological disorders, as well as anxiety phenotypes<sup>58,59</sup>, we also investigated a  
326 panel of voltage-gated calcium channels. Expression of *Cacna1d*, which encodes the  
327 Cav1.3 channel of L-type calcium gated voltage channels, was increased in the mPFC  
328 of *C3aR*<sup>-/-</sup> mice (Figure 6E) and in both *C3*<sup>-/-</sup> and *C3aR*<sup>-/-</sup> mice there was upregulation  
329 of cerebellar *Cacna1e*, which encodes the Cav2.3 channel of R-type voltage gated  
330 calcium channels (Figure 6F). We also investigated the expression of *Cacna1c* which  
331 encodes the Ca<sub>v</sub>1.2 subunit of L-type voltage gated calcium channels that forms the  
332 channel pore allowing calcium entry<sup>60</sup>. We found genotype and brain region specific  
333 changes in *Cacna1c* expression, with selective increases in expression in *C3aR*<sup>-/-</sup> mice  
334 in the vHPC and cerebellum, but not the mPFC (Figure 6G).

335

## 336 **Discussion**

337 We have used knockout models manipulating specific complement proteins to reveal  
338 dissociable effects of complement pathways on distinct elements of aversive  
339 behaviours. A main finding was a profound innate anxiety phenotype in the *C3aR*<sup>-/-</sup>  
340 mice that was absent in *C3*<sup>-/-</sup> mice. The specificity of the anxiety phenotype exhibited  
341 by *C3aR*<sup>-/-</sup> mice at the behavioural level was paralleled by EPM-evoked corticosterone  
342 levels, confirming the validity of the EPM as an index of anxiety-like behaviour. A

343 second main finding was a double dissociation in terms of fear learning, whereby  $C3^-$   
344  $^-$  and not  $C3aR^-$  mice displayed enhanced conditioned fear reactivity. Using  $C5^-$   
345 mice, we concluded that the mechanisms accounting for the fear learning phenotype  
346 in  $C3^-$  mice are likely to arise from lack of iC3b/CR3 pathway activity. Although the  
347 data presented here was in males, we can report that the same highly specific double  
348 dissociation between innate anxiety and learned fear was also seen in females  
349 (Supplementary Figures S6-9) extending the broader applicability of our findings.  
350 These data indicate distinct effects mediated by closely related elements of the  
351 complement system that differentially impact upon the neural mechanisms underlying  
352 innate anxiety and learned fear.

353

354 Our use of specific complement knockout models allowed us to pinpoint the likely  
355 complement pathways and potential mechanisms underlying the observed  
356 phenotypes. Since C3a is solely produced via C3 cleavage, and C3aR is the canonical  
357 receptor for C3a, we expected that any phenotypes dependent on the binding of C3a  
358 to the C3aR would be apparent in both  $C3^-$  and  $C3aR^-$  models. However, this was  
359 not borne out in our data. Given the divergence in innate anxiety phenotypes seen,  
360 one explanation is that the  $C3aR^-$  phenotypes are independent of C3a and instead  
361 mediated by an alternative ligand. It has long been speculated that there may be  
362 promiscuity of the C3aR due to its unusually large second extracellular loop<sup>61</sup>. Indeed,  
363 a cleavage fragment of the neuropeptide precursor protein VGF (non-acronymic),  
364 TLQP-21, was recently reported to bind the C3aR<sup>62,63</sup>. This peptide has pleiotropic  
365 roles including in the stress response<sup>64</sup> and its precursor VGF is widely expressed  
366 throughout the CNS<sup>65</sup> and in regions associated with stress reactivity and C3aR  
367 expression such as the hypothalamus<sup>66,67</sup>. Determining whether the mechanisms

368 underlying innate anxiety phenotypes in *C3aR*<sup>-/-</sup> mice are dependent on TLQP-  
369 21/C3aR interactions will be a priority for future work.

370

371 Whether the *C3aR*<sup>-/-</sup> phenotypes described here are the result of ongoing effects of  
372 *C3aR* deletion in the adult brain or instead the enduring consequence of  
373 neurodevelopmental impacts of *C3aR* deficiency also remains to be determined. On  
374 the basis of previous findings implicating C3aR in both developmental neurogenesis<sup>68</sup>  
375 and in acute brain changes following behavioural manipulations<sup>69</sup>, both are  
376 possibilities. One strategy would be to test whether acute administration of the C3aR  
377 antagonist SB290157<sup>70</sup> phenocopies the constitutive knockout of *C3aR*, though at  
378 present no data is available on the CNS penetration of SB290157 and this molecule  
379 has received criticism due to evidence of agonist activity<sup>71</sup>.

380

381 We also probed mechanisms underpinning the *C3aR*<sup>-/-</sup> innate anxiety phenotype by  
382 assessing the effects of the anxiolytic drug diazepam. We found that a dose of  
383 diazepam that was anxiolytic in wildtype mice had no effect in *C3aR*<sup>-/-</sup> mice. Stretch  
384 attend postures, postulated to reflect risk assessment behaviour<sup>46</sup>, are highly sensitive  
385 to pharmacological manipulation<sup>40,72</sup> and in agreement with our own findings,  
386 diazepam has been shown to specifically decrease SAPs in the absence of effects on  
387 open arm exploration<sup>73</sup>. Importantly, *C3aR*<sup>-/-</sup> mice consistently performed more SAPs  
388 than other genotypes, and therefore floor effects cannot account for the pattern of  
389 results observed. Benzodiazepines act on GABA<sub>A</sub> receptors<sup>55</sup> however we found no  
390 significant changes in expression of *Gabra2*, a GABA<sub>A</sub> receptor subunit responsible  
391 for anxiolytic actions of benzodiazepines in tests of innate anxiety<sup>55</sup>, in the brain  
392 regions sampled. This raises the possibility of alternative molecular mechanisms



393 mediating the anxiety phenotypes seen in the *C3aR*<sup>-/-</sup> model. Whatever the molecular  
394 underpinnings of the dissociable anxiety phenotypes, our data show a profoundly  
395 altered effect of diazepam in both knockouts; a lack of response in *C3aR*<sup>-/-</sup> and an  
396 apparent paradoxical anxiogenic effect of the drug in *C3*<sup>-/-</sup> mice, though this  
397 interpretation needs to take into account an apparent selective sedative effect in *C3*<sup>-/-</sup>  
398 mice.

399

400 In contrast to innate anxiety, we observed a specific effect of C3 knockout on  
401 conditioned fear. The absence of a comparable phenotype in *C3aR*<sup>-/-</sup> and *C5*<sup>-/-</sup> mice  
402 suggested that these effects were unlikely to be due to loss of either C3a/C3aR,  
403 C5a/C5aR, or the terminal pathway, and instead that enhanced fear learning  
404 phenotypes in *C3*<sup>-/-</sup> mice were likely dependent on loss of the iC3b/CR3 pathway. This  
405 pathway has been strongly implicated in activity dependent synaptic elimination during  
406 neurodevelopment<sup>13,25</sup> and in age-dependent synapse loss<sup>74</sup>. While demonstrations  
407 of complement mediated synaptic pruning during development have centered on the  
408 visual system, complement-mediated microglial phagocytosis of dopamine D1  
409 receptors has been demonstrated in the nucleus accumbens with functional impacts  
410 on social behaviour<sup>75</sup>. It remains to be seen whether complement mediated processes  
411 of this nature, within brain regions linked to fear processing such as the ventral  
412 hippocampus, amygdala and prefrontal cortex are responsible for enhanced fear  
413 learning in *C3*<sup>-/-</sup> mice, or whether this phenotype is a general consequence of altered  
414 synaptic elimination throughout the *C3*<sup>-/-</sup> brain. In addition to developmental processes,  
415 the iC3b/CR3 pathway could also be involved acutely in fear learning. C3 mRNA is  
416 upregulated during discrete stages of fear learning<sup>69</sup> and microglial CR3 is implicated



417 in long term depression<sup>76</sup>. Furthermore, complement-mediated engulfment of  
418 synapses by microglia may be important in the forgetting of fear memories<sup>14</sup>.

419

420 At the gene expression level, we found some changes which were common to both  
421 knockouts, and one result that was specific to *C3aR*<sup>-/-</sup> mice. Regarding the latter, there  
422 was a highly specific increase in expression of *Cacna1c* in the ventral hippocampus  
423 and cerebellum of *C3aR*<sup>-/-</sup> mice. This finding is of potential interest given the strong  
424 evidence implicating *CACNA1C* variants in genetic risk for a broad spectrum of  
425 psychiatric disorders including schizophrenia and bipolar disorder<sup>58</sup>, with anxiety  
426 phenotypes reported in both human risk variant carriers<sup>77</sup> and animal models<sup>78-81</sup>.  
427 Whether alterations in *Cacna1c* are of functional relevance to the *C3aR*<sup>-/-</sup> anxiety  
428 phenotypes observed here remains to be determined. We also observed increased  
429 cerebellar expression of the glucocorticoid receptor in both *C3*<sup>-/-</sup> and *C3aR*<sup>-/-</sup> mice,  
430 suggesting that these alterations may result from the absence of C3a/C3aR signalling.  
431 Expression of these genes did not differentiate between models and therefore were  
432 unlikely to contribute to the dissociable effects of the knockouts on behaviour and  
433 stress hormone physiology. Neuronal activity in the ventral hippocampus as indexed  
434 by *c-Fos* gene expression after exposure to the EPM also failed to differentiate  
435 between genotypes, and hence activity in other brain regions in particular the  
436 amygdala and hypothalamus may be more informative in terms of functional  
437 neuroanatomy underlying the anxiety-related behavioural and physiological  
438 differences seen in the knockout models.

439

440 Anxiety and fear are commonly comorbid with depression and recent preclinical work  
441 has suggested a protective role for C3a/C3aR in chronic-stress induced depressive-

442 behaviour<sup>82</sup>. Given the common co-occurrence of anxiety and depression, our findings  
443 of enhanced anxiety in *C3aR*<sup>-/-</sup> mice might seem at odds with the reported resilience  
444 of this strain to depression-related phenotypes<sup>82</sup>. However, the chronic unpredictable-  
445 stress paradigm used in these studies is likely to evoke significant inflammation, and  
446 therefore the extent to which our data in acutely stressed animals can be compared is  
447 questionable. In summary, our findings add significantly to the evidence that  
448 perturbations of the complement system, whether reduced complement activation as  
449 in the present work or excessive activation as is predicted by *C4* genetic variants<sup>24,83</sup>,  
450 have major and dissociable effects on brain and behavioural phenotypes of relevance  
451 to core clinical symptoms of psychiatric disease.

452

## 453 **Materials and Methods**

454 **Mouse models and husbandry.** Wildtype and *C3*<sup>-/-</sup> strains were sourced in-house  
455 from Professor B. Paul Morgan and Dr Timothy Hughes (strains originally from The  
456 Jackson Laboratory; B6.PL-Thy1<sup>a</sup>/CyJ stock#000406 and B6;129S4-C3tm1Crr/J  
457 stock#003641 respectively); *C3aR*<sup>-/-</sup> mice were provided by Professor Craig Gerard of  
458 Boston Children's Hospital, USA (strain originally from The Jackson Laboratory, strain  
459 C.129S4-C3ar1<sup>tm1Cge</sup>/J, stock#005712, subsequently backcrossed to C57Bl/6J).  
460 *C5*<sup>-/-</sup> mice (as described in <sup>84</sup>) were kindly donated by Professor Marina Botto, Imperial  
461 College London. This strain originated from naturally *C5*-deficient DBA/2J mice, that  
462 had been backcrossed to C57Bl/6J. *C3*<sup>-/-</sup>, *C3aR*<sup>-/-</sup> and *C5*<sup>-/-</sup> strains were maintained via  
463 homozygous breeding on a C57Bl/6J background and in all experiments were  
464 compared to wildtype mice also on a C57Bl/6J background. Male mice (3-8 months  
465 old during experimental testing) were kept in a temperature and humidity-controlled  
466 vivarium (21±2°C and 50±10%, respectively) with a 12-hour light-dark cycle (lights on

467 at 07:00hrs/lights off at 19:00hrs). Home cages were environmentally enriched with  
468 cardboard tubes, soft wood blocks and nesting materials and animals were housed in  
469 single sex littermate groups (2-5 mice/cage). Standard laboratory chow and water  
470 were available *ad libitum*. All procedures were performed in accordance with the  
471 requirements of the UK Animals (Scientific Procedures) Act (1986).

472

473 **General behavioural methods.** Testing took place between the hours of 09:00 and  
474 17:00, with random distribution of testing for subjects of different genotypes throughout  
475 the day. Mice were habituated to the test rooms for 30 min prior to testing. All assays  
476 involved individual testing of mice and apparatus was cleaned thoroughly with a 70%  
477 ethanol solution between subjects.

478

479 **Data collection.** Data for the EPM, EZM and Open Field were collected using  
480 EthoVision XT software (Noldus Information Technology, Netherlands) via a video  
481 camera mounted above the centre of each piece of apparatus. Tracking of each  
482 subject was determined as the location of the greater body-proportion (12 frames/s) in  
483 the specific virtual zones of each piece of apparatus.

484

485 **The elevated plus maze (EPM).** The maze, positioned 300 mm above the floor and  
486 illuminated evenly at 15 lux, was constructed of opaque white Perspex and consisted  
487 of two exposed open arms (175 x 78 mm<sup>2</sup>, length x width, no ledges) and two equally  
488 sized enclosed arms, which had 150 mm high walls<sup>85</sup>. Equivalent arms were arranged  
489 opposite one another. Subjects were placed at the enclosed end of a closed arm and  
490 allowed to freely explore for 5 minutes. Data from each pair of arms were combined  
491 to generate single open and closed arm values (number and duration of arm entries

492 and latency of first entry to each arm). In addition, the following parameters were  
493 manually scored (by an experimenter positioned at a computer in the same room as  
494 the maze, watching the live-video stream of the test); number of stretch-attend  
495 postures (SAPs; defined as the animal slowly and carefully reaching towards the open  
496 arms in a low, elongated body posture<sup>86,87</sup>) and number of head dips from the open  
497 arms (looking down over the edge of an open arm).

498

499 **The elevated zero maze (EZM).** The maze, positioned 520 mm above the floor and  
500 illuminated evenly at 15 lux, was constructed of wood and consisted of two exposed  
501 open regions (without ledges; 52 mm wide) and two equally sized enclosed regions  
502 (also 52 mm wide), which had 200 mm high grey opaque walls. The diameter of the  
503 maze was 600mm. Equivalent regions were arranged opposite one another. Subjects  
504 were placed at the border of one of the open and closed regions and allowed to freely  
505 explore for 5 min. Data from each pair of regions were combined to generate single  
506 open and closed region values (number and duration of region entries and latency of  
507 first entry to each region). In addition, the number of head dips (as above) were  
508 measured. Due to the high walls of the enclosed sections of the maze, subjects were  
509 not visible to the experimenter when in the closed regions and therefore these  
510 parameters were scored only when a subject was on the open regions.

511

512 **Locomotor activity (LMA).** LMA was measured in an apparatus consisting of twelve  
513 transparent Perspex chambers (each 210 x 360 x 200 mm, width x length x height).  
514 Two infrared beams were embedded within the walls of each chamber, which crossed  
515 the chamber 30 mm from each end and 10 mm from the chamber floor. Individual  
516 subjects were placed in a designated chamber for a 120 min duration on three

517 consecutive days. Beam breaks were recorded as an index of activity, using a  
518 computer running custom written BBC Basic V6 programme with additional interfacing  
519 by ARACHNID (Cambridge Cognition Ltd, Cambridge, UK). Data were analysed as  
520 the total number of beam breaks per session per day.

521

522 **Fear-potentiated startle (FPS).** FPS was assessed using startle chamber apparatus  
523 which consisted of a pair of ventilated and soundproofed SR-LAB startle chambers  
524 (San Diego Instruments, CA, USA) each containing a non-restrictive Plexiglas cylinder  
525 (35 mm in diameter), mounted on a Perspex plinth, into which a subject was placed.  
526 The motor responses of subjects to white noise stimuli (generated from a speaker 120  
527 mm above the cylinder) were recorded via a piezoelectric accelerometer, attached  
528 centrally below the Plexiglas cylinder, which converted flexion plinth vibration into  
529 electrical signals. The peak startle response, within 200ms from the onset of each  
530 startle presentation, in each trial, was normalized for body weight differences using  
531 Kleiber's 0.75 mass exponent<sup>88</sup> as per<sup>85</sup>. A computer running SR-Lab software  
532 (Version 94.1.7.48) was used to programme trials and record data. A foot shock grid  
533 connected to a shock generator (San Diego Instruments, CA, USA) was inserted into  
534 the Plexiglas cylinder before conditioning sessions.

535

536 FPS consisted of three separate sessions presented over a two-day period (see Figure  
537 4A). On the first day, mice were given a pre-conditioning session immediately followed  
538 by the conditioning session. The pre-conditioning session started with a 5 min  
539 acclimatisation phase followed by presentation of 3 no-stimulus trials, and then a block  
540 of pulse-alone trials presented at 90, 100 and 110dB (5 of each at 40 ms duration).  
541 Trials were randomly distributed throughout the session and presented with a 60 s

542 random interval (range 36 s to 88 s). After the pre-conditioning session was complete,  
543 mice were removed from the startle chambers, restraint tubes cleaned, and shock  
544 grids were placed into the Plexiglas cylinders prior to commencing the conditioning  
545 session. The mice were then returned to the startle chambers and subjected to a  
546 session consisting of a 5 min acclimatisation phase followed by 3 CS+shock trials, with  
547 3 no stimulus trials before and after, presented with a 2min random interval (range 1.5  
548 to 3min). The scrambled 0.14 mA, 0.5 s foot shock was delivered in the final 0.5 s of  
549 the 30 s visual CS. Following a 24hr delay, subjects were assessed for FPS in the  
550 post-conditioning session. This session followed the same format as the pre-  
551 conditioning session (5 min acclimatisation phase followed by presentation of 3 no-  
552 stimulus trials, and then a block of pulse-alone trials presented at 90, 100 and 110dB,  
553 with 5 of each at 40 ms duration) however the final block of trials also included  
554 pulse+CS trials at 90, 100 and 110 dB (5 of each), with the startle pulse presented in  
555 the final 40 ms of the CS. FPS was determined as the fold change between pulse-  
556 alone trials and pulse+CS trials within the post-conditioning session.

557

558 **Corticosterone measurements.** Testing took place between the hours of 10:00 and  
559 14:00 to account for the diurnal pattern of corticosterone release<sup>89</sup>. Mice were allowed  
560 to freely explore the EPM for 5 min, after which they were placed in a holding cage for  
561 a further 25 min before being culled by cervical dislocation. Control mice were  
562 removed from their home cage and immediately culled. There was an equal  
563 distribution of subjects of different genotypes, counterbalanced between the two test  
564 conditions and throughout the testing period. Trunk blood was collected into heparin  
565 tubes (Becton Dickinson, USA) and immediately centrifuged at 4000 rpm for 10 min,  
566 and the supernatant removed and frozen at -80°C until further use. A corticosterone

567 ELISA was performed according to manufacturer's instructions (ADI-900-097, Enzo  
568 Life Sciences, UK) and analysed using a four-parameter logistic curve plug in  
569 (<https://www.myassays.com/four-parameter-logistic-curve.assay>).

570

571 **Immediate early gene (IEG) experiment.** Mice were allowed to freely explore the  
572 EPM for 5 min, after which they were placed in a holding cage for a further 25 min  
573 before being culled by cervical dislocation. Control mice were removed from their  
574 home cage and immediately culled. Brains were removed and the ventral  
575 hippocampus (vHPC; the whole hippocampus was dissected and the posterior third  
576 was collected) was dissected and frozen at -80° until further use. Tissue was  
577 processed for qPCR analyses as detailed below.

578

579 **Diazepam study.** Wildtype,  $C3^{-/-}$  and  $C3aR^{-/-}$  were used and were randomly assigned  
580 to either vehicle or drug conditions within each genotype. A three-day dosing regimen  
581 of diazepam (2 mg/kg, i.p., Hameln Pharmaceuticals, UK) or an equivalent volume of  
582 vehicle (0.1 M phosphate buffered saline, pH 7.4) was used. Following 2 days of pre-  
583 treatment, diazepam or vehicle was administered 30 min prior to testing on the EPM  
584 on the 3<sup>rd</sup> day.

585

586 **Tissue for gene expression analysis.** Mice were removed from their home cage and  
587 immediately culled via cervical dislocation. Brains were removed from mice in both  
588 conditions, and the following regions dissected: medial prefrontal cortex (mPFC),  
589 ventral hippocampus (vHPC) and cerebellum (see Figure 6A) and frozen at -80° until  
590 further use.

591

592 **Quantitative Polymerase Chain Reaction (qPCR).** Gene expression was analysed  
593 using standardised qPCR methods with quantification using the  $2^{-\Delta\Delta Ct}$  method<sup>90</sup>.  
594 Mouse brain tissue from the mPFC, vHPC and the cerebellum was analysed. RNA  
595 was extracted using the RNeasy kit (QIAGEN) and was subsequently treated with  
596 DNase to remove genomic DNA (TURBO DNA-free kit, Thermo Fisher Scientific).  
597 RNA was then converted to cDNA (RNA to cDNA EcoDry Premix, Random Hexamers,  
598 Clontech, Takara). cDNA samples were run in triplicate in 96 well reaction plates using  
599 SYBR-Green-based qPCR (SensiFast, HI-ROX, Biorline) according to manufacturer's  
600 instructions using a StepOnePlus System (Applied Biosystems, Thermo Fisher  
601 Scientific). Genotypes were counterbalanced across plates and genes of interest were  
602 run alongside housekeeping genes *Gapdh* and *Hrpt1* for each sample, within the same  
603 reaction plate. All samples were run in triplicate and samples differing by  $>0.3$  Cts  
604 were excluded. The change in expression of genes of interest, after normalisation to  
605 the two house-keeping genes ( $\Delta Ct$ ) was transformed to yield  $2^{-\Delta\Delta Ct}$  values. Relative  
606 changes from wildtype animals were calculated for each gene of interest.

607

### 608 **Primers**

609 Primers were designed to span at least one exon-exon junction and to match the target  
610 sequence only in mouse (Primer-Blast, NCBI) and were synthesised commercially  
611 (Sigma Aldrich). Primer efficiency was determined separately through a dilution series  
612 of cDNA samples from wildtype hippocampus, cerebellum and cortex. Primers with an  
613 efficiency between 90-110% were selected.

614

615

616



617 **Table 1.** List of primer sequences used.

| Gene           | Species | Forward                  | Reverse                 |
|----------------|---------|--------------------------|-------------------------|
| <i>Gapdh</i>   | Mouse   | GAACATCATCCCTGCATCCA     | CCAGTGAGCTTCCC GTTCA    |
| <i>Hprt1</i>   | Mouse   | TTGCTCGAGATGTCATGAAGGA   | AATGTAATCCAGCAGGTCAGCAA |
| <i>Gabra2</i>  | Mouse   | AAGCCACTGGAGGAAAACATCT   | TTAGCCAGCACCAACCTGAC    |
| <i>Crhr1</i>   | Mouse   | CTTCAACTCTTTCTGGAGTCCT   | TGGCAGAGCGGACCTCA       |
| <i>Nr3c1</i>   | Mouse   | AAACTCTGCCTGGTGTGCTC     | GGTAATTGTGCTGTCCTCCAC   |
| <i>Cacna1c</i> | Mouse   | ATGGTTCTTGTGAGCATGTTGCGG | TGCAAATGTGGAACCGGTAAGTG |
| <i>Cacna1d</i> | Mouse   | AGAGGACCATGCGAACGAG      | CCTTACCAGAAATAGGGAGTCT  |
| <i>Cacna1e</i> | Mouse   | CTCATGTCACCACCGCTAGG     | TCTGTCTGCACCACCTTTGG    |
| <i>cFos</i>    | Mouse   | CTCCAAGCGGAGACAGATCAA    | TCGGTGGGCTGCCAAAATAA    |
| <i>Zif268</i>  | Mouse   | GACCACAGAGTCCTTTTCTGACA  | CTGAAAAGGGGTT CAGGCCA   |

618

619 **Genotyping** Genotyping was performed on post-mortem tail tip samples. Qiagen  
620 DNeasy Blood and Tissue Kits (Qiagen, Manchester, UK) were used to extract  
621 genomic DNA (gDNA) as per the manufacturers standard protocol. For *C3<sup>-/-</sup>* mice, JAX  
622 protocol 27746 was used (common; ATCTTGAGTGCACCAAGCC, wildtype;  
623 GGTTGCAGCAGTCTATGAAGG, mutant; GCCAGAGGCCACTTGTATAG) and for  
624 *C3aR<sup>-/-</sup>* JAX protocol 27638 was used (common; AGCCATTCTAGGGGCGTATT, wild  
625 type reverse; CATGGTTTGGGGTTATTTCCG, mutant reverse;  
626 TTGATGTGGAATGTGTGCGAG). For both genotypes, a touchdown cycling protocol  
627 was used (see JAX protocols for details). Genotyping for *C5<sup>-/-</sup>* mice was performed as  
628 described in <sup>84</sup>.

629

630 **Statistical analysis.** All statistical analyses were carried out using GraphPad Prism  
631 8.4.1 (GraphPad Software, CA, USA). Data was assessed for equality of variances

632 using the Brown-Forsythe test and then appropriate parametric (*t* test, one-way or two-  
633 way ANOVA) or non-parametric (Kruskal-Wallis) tests used. *Post hoc* pairwise  
634 comparisons were performed using the Tukey or Dunn's tests for parametric or non-  
635 parametric analyses, respectively. For all analyses, alpha was set to 0.05 and exact *p*  
636 values were reported unless  $p < 0.0001$ . All *p* values were multiplicity adjusted<sup>91</sup>. Data  
637 are expressed as mean  $\pm$  standard error of the mean.

638

639 The main between-subjects' factor for all ANOVA analyses was GENOTYPE (WT, *C3*  
640 *-/-*, *C3aR**-/-*, or *C5**-/-*). For the EPM, LMA and FPS experiments, there were within-  
641 subject factors of ZONE (open, closed, middle), DAY (1,2,3) and STIMULUS  
642 INTENSITY (90, 100, 110 dB) respectively. Analysis of plasma corticosterone by two-  
643 way ANOVA included an additional between subject factor of CONDITION (baseline,  
644 EPM), and for the diazepam experiment, there was an additional between subject  
645 factor of DRUG (diazepam, vehicle). For qPCR analyses,  $\Delta$ Ct values were analysed  
646 by one-way ANOVA.

647

648

649

650

651

652

653

654

655

656

657 **Author's contributions**

658 The study was designed by LJW, TH, BPM, WPG and LSW. LJW and TH performed  
659 behavioural experiments with assistance from NH. Molecular analyses were  
660 performed by SAB, EB, MT, ALM, SAB, EB, MT, NL, AIB and LJW. Data interpretation  
661 were carried out by JH, MJO, JR, WPG, NH, TRH, BPM, LSW and TH. The manuscript  
662 was drafted by LJW, TH, WPG and LSW. All authors approved the final manuscript.

663

664 **Acknowledgements**

665 The authors thank Professor Craig Gerard and Professor Marina Botto for provision of  
666 the *C3aR<sup>-/-</sup>* and *C5<sup>-/-</sup>* strains respectively, and to Rhys Perry, Pat Mason, Helen Read  
667 and other staff at JBIOS for their invaluable animal care and husbandry. Thanks also  
668 to Dr Emma Watts for her feedback on the manuscript. This work was supported by a  
669 Wellcome Trust Integrative Neuroscience PhD Studentship awarded to LJW  
670 (099816/Z/12/Z), a Waterloo Foundation Early Career Fellowship awarded to LJW, a  
671 Hodge Centre for Neuropsychiatric Immunology Seed Corn and Project grant awarded  
672 to LJW and a Wellcome Trust Strategic Award 100202/Z/12/Z (DEFINE) held by the  
673 Neuroscience and Mental Health Research Institute at Cardiff University.

674

675 **Competing financial interests**

676 The authors declare no competing financial interests.

677

678 **Materials and correspondence**

679 All data from this study are available from the corresponding authors upon reasonable  
680 request.

681

## 682 References

- 683  
684 1. Coulthard, L. G. & Woodruff, T. M. Is the Complement Activation Product  
685 C3a a Proinflammatory Molecule? Re-evaluating the Evidence and the  
686 Myth. *J. Immunol.* **194**, 3542–3548 (2015).  
687 2. Norgauer, J. *et al.* Complement fragment C3a stimulates Ca<sup>2+</sup> influx in  
688 neutrophils via a pertussis-toxin-sensitive G protein. *Eur. J. Biochem.*  
689 **217**, 289–294 (1993).  
690 3. Möller, T., Nolte, C., Burger, R., Verkhratsky, A. & Kettenmann, H.  
691 Mechanisms of C5a and C3a Complement Fragment-Induced [Ca<sup>2+</sup>]<sub>i</sub>  
692 Signalling in Mouse Microglia. *Journal of Neuroscience* **17**, 615–624  
693 (1997).  
694 4. Lian, H., Li, Y., Lu, H.-C. & Zheng, H. NFκB-Activated Astroglial Release  
695 of Complement C3 Compromises Neuronal Morphology and Function  
696 Associated with Alzheimer's Disease. *Neuron*, **85**, 101–115 (2015).  
697 5. Sayah, S. *et al.* Two different transduction pathways are activated by C3a  
698 and C5a anaphylatoxins on astrocytes. *Molecular Brain Research* **112**,  
699 53–60 (2003).  
700 6. Morley, B. J. & Walport, M. J. *The Complement FactsBook*. (Academic  
701 Press, 1999).  
702 7. Kemper, C. & Köhl, J. Back to the future – non-canonical functions of  
703 complement. *Seminars in Immunology* **37**, 1–3 (2018).  
704 8. Nataf, S., Stahel, P. F., Davoust, N. & Barnum, S. R. Complement  
705 anaphylatoxin receptors on neurons: new tricks for old receptors? *Trends*  
706 *Neurosci.* **22**, 397–402 (1999).  
707 9. Veerhuis, R., Nielsen, H. M. & Tenner, A. J. Complement in the brain.  
708 *Molecular Immunology* **48**, 1592–1603 (2011).  
709 10. Bénard, M., Gonzalez, B. J., Biological, M. S. J. O.2004. Characterization  
710 of C3a and C5a receptors in rat cerebellar granule neurons during  
711 maturation neuroprotective effect of C5a against apoptotic cell death. *J*  
712 *Biol. Chem.* **42**, 43487-43496 (2004).  
713 11. Rahpeymai, Y. *et al.* Complement: a novel factor in basal and ischemia-  
714 induced neurogenesis. *EMBO J* **25**, 1364–1374 (2006).  
715 12. Gorelik, A. *et al.* Developmental activities of the complement pathway in  
716 migrating neurons. *Nature Communications* **8**, 15096 (2017).  
717 13. Stevens, B. *et al.* The classical complement cascade mediates CNS  
718 synapse elimination. *Cell* **131**, 1164–1178 (2007).  
719 14. Wang, C. *et al.* Microglia mediate forgetting via complement-dependent  
720 synaptic elimination. *Science*, **367**, 688-694 (2020).  
721 15. Harold, D. *et al.* Genome-wide association study identifies variants at  
722 CLU and PICALM associated with Alzheimer's disease. *Nature Genetics*  
723 **41**, 1088–1093 (2009).  
724 16. Jansen, I. E. *et al.* Genome-wide meta-analysis identifies new loci and  
725 functional pathways influencing Alzheimer's disease risk. *Nature Genetics*  
726 **51**, 404–413 (2019).  
727 17. Shi, Q. *et al.* Complement C3-Deficient Mice Fail to Display Age-Related  
728 Hippocampal Decline. *Journal of Neuroscience* **35**, 13029–13042 (2015).

- 729 18. Zhou, J., Fonseca, M. I., Pisalyaput, K. & Tenner, A. J. Complement C3  
730 and C4 expression in C1q sufficient and deficient mouse models of  
731 Alzheimer's disease. *Journal of Neurochemistry* **106**, 2080–2092 (2008).
- 732 19. Corbett, B. A. *et al.* A proteomic study of serum from children with autism  
733 showing differential expression of apolipoproteins and complement  
734 proteins. *Mol. Psychiatry* **12**, 292 (2007).
- 735 20. Maes, M., Delange, J., Ranjan, R., Meltzer, H. Y. & Desnyer, R. Acute  
736 phase proteins in schizophrenia, mania and major depression:  
737 modulation by psychotropic drugs. *Psychiatry Research*, **66**, 1–11 (1997).
- 738 21. Ruland, T. *et al.* Molecular serum signature of treatment resistant  
739 depression. *Psychopharmacology* 1–9 (2016).
- 740 22. Song, Y. R. *et al.* Specific alterations in plasma proteins during  
741 depressed, manic, and euthymic states of bipolar disorder. *Brazilian  
742 Journal of Medical and Biological Research* **48**, 973–982, (2015).
- 743 23. Oganessian, L. P., Mkrtchyan, G. M., Sukiasyan, S. H. & Boyajyan, A. S.  
744 Classic and alternative complement cascades in post-traumatic stress  
745 disorder. *Bull. Exp. Biol. Med.* **148**, 859–861 (2009).
- 746 24. Sekar, A. *et al.* Schizophrenia risk from complex variation of complement  
747 component 4. *Nature*, **530**, 117–183 (2016).
- 748 25. Schafer, D. P. *et al.* Microglia Sculpt Postnatal Neural Circuits in an  
749 Activity and Complement-Dependent Manner. *Neuron* **74**, 691–705  
750 (2012).
- 751 26. Håvik, B. *et al.* The Complement Control-Related Genes CSMD1 and  
752 CSMD2 Associate to Schizophrenia. *BPS* **70**, 35–42 (2011).
- 753 27. Zhang, S. *et al.* Association Between Polymorphisms of the Complement  
754 3 Gene and Schizophrenia in a Han Chinese Population. *Cell. Physiol.  
755 Biochem.* **46**, 2480–2486 (2018).
- 756 28. Tovote, P., Fadok, J. P. & Lüthi, A. Neuronal circuits for fear and anxiety.  
757 *Nat. Rev.* **16**, 317–331 (2015).
- 758 29. Perusini, J. N. & Fanselow, M. S. Neurobehavioral perspectives on the  
759 distinction between fear and anxiety. *Learn. Mem.* **22**, 417–425 (2015).
- 760 30. Davis, M. Neural systems involved in fear and anxiety measured with  
761 fear-potentiated startle. *Am Psychol* **61**, 741–756 (2006).
- 762 31. Engin, E. *et al.* Modulation of anxiety and fear via distinct  
763 intrahippocampal circuits. *eLife*, **5:e14120**, (2016).
- 764 32. Vogelzangs, N., Beekman, A. T. F., de Jonge, P. & Penninx, B. W. J. H.  
765 Anxiety disorders and inflammation in a large adult cohort. *Translational  
766 Psychiatry* **3**, e249–e249 (2013).
- 767 33. Girardi, G. *et al.* Imaging of activated complement using ultrasmall  
768 superparamagnetic iron oxide particles (USPIO)-conjugated vectors: An  
769 in vivo in utero non-invasive method to predict placental insufficiency and  
770 abnormal fetal brain development. *Mol. Psychiatry* **20**, 1017–1026 (2015).
- 771 34. Kulkarni, A. P., Govender, D. A., Kotwal, G. J. & Kellaway, L. A.  
772 Modulation of anxiety behavior by intranasally administered Vaccinia  
773 virus complement control protein and curcumin in a mouse model of  
774 Alzheimer's disease. *Current Alzheimer Research* **8**, 95–113 (2011).
- 775 35. Fischer, M. B., Ma, M., Goerg, S., Zhou, X. & Xia, J. Regulation of the B  
776 cell response to T-dependent antigens by classical pathway complement.  
777 *J. Immunol.* **157**, 549-556, (1996).

- 778 36. Humbles, A. A. *et al.* A role for the C3a anaphylatoxin receptor in the  
779 effector phase of asthma. *Nature*, **406**, 998–1001 (2000).
- 780 37. Pellow, S., Chopin, P., File, S. E. & Briley, M. Validation of open : closed  
781 arm entries in an elevated plus-maze as a measure of anxiety in the rat.  
782 *J. Neurosci. Methods* **14**, 149–167 (1985).
- 783 38. Walf, A. A. & Frye, C. A. The use of the elevated plus maze as an assay  
784 of anxiety-related behavior in rodents. *Nat Protoc* **2**, 322–328 (2007).
- 785 39. Ennaceur, A. Tests of unconditioned anxiety - pitfalls and  
786 disappointments. *Physiology & Behavior* **135**, 55–71 (2014).
- 787 40. RODGERS, R. J. Anxiety, defence and the elevated plus-maze.  
788 *Neuroscience and Biobehavioural Reviews*, **21**, 801-810, (1997).
- 789 41. Braun, A. A., Skelton, M. R., Vorhees, C. V. & Williams, M. T.  
790 Comparison of the elevated plus and elevated zero mazes in treated and  
791 untreated male Sprague-Dawley rats: Effects of anxiolytic and anxiogenic  
792 agents. *Pharmacology Biochemistry and Behavior* **97**, 406–415 (2011).
- 793 42. Kheirbek, M. A. *et al.* Differential Control of Learning and Anxiety along  
794 the Dorsoventral Axis of the Dentate Gyrus. *Neuron* **77**, 955–968 (2013).
- 795 43. Kubik, S., Miyashita, T. & Guzowski, J. F. Using immediate-early genes  
796 to map hippocampal subregional functions. *Learning & Memory* **14**, 758–  
797 770 (2007).
- 798 44. Lepicard, E. M., Joubert, C., Hagneau, I., Perez-Diaz, F. & Chapouthier,  
799 G. Differences in anxiety-related behavior and response to diazepam in  
800 BALB/cByJ and C57BL/6J strains of mice. *Pharmacology Biochemistry  
801 and Behavior* **67**, 739–748 (2000).
- 802 45. Grewal, S. S., SHEPHERD, J. K., Bill, D. J., Fletcher, A. & Dourish, C. T.  
803 Behavioural and pharmacological characterisation of the canopy  
804 stretched attend posture test as a model of anxiety in mice and rats.  
805 *Psychopharmacology* **133**, 29–38, (1997).
- 806 46. Kaesermann, H. P. Stretched attend posture, a non-social form of  
807 ambivalence, is sensitive to a conflict-reducing drug action.  
808 *Psychopharmacology* **89**, 31–37, (1986).
- 809 47. Albrechet-Souza, L., Cristina de Carvalho, M., Rodrigues Franci, C. &  
810 Brandão, M. L. Increases in plasma corticosterone and stretched-attend  
811 postures in rats naive and previously exposed to the elevated plus-maze  
812 are sensitive to the anxiolytic-like effects of midazolam. *Hormones and  
813 Behavior* **52**, 267–273 (2007).
- 814 48. Holt, D. J., Coombs, G., Zeidan, M. A., Goff, D. C. & Milad, M. R. Failure  
815 of neural responses to safety cues in schizophrenia. *Arch Gen Psychiatry*  
816 **69**, 893–903 (2012).
- 817 49. Grillon, C., Morgan, C. A., Southwick, S. M., Davis, M. & Charney, D. S.  
818 Baseline startle amplitude and prepulse inhibition in Vietnam veterans  
819 with posttraumatic stress disorder. *Psychiatry Research* **64**, 169–178  
820 (1996).
- 821 50. Falls, W. A., Carlson, S., Turner, J. G. & Willott, J. F. Fear-potentiated  
822 startle in two strains of inbred mice. *Behavioral Neuroscience* **111**, 855–  
823 861 (1997).
- 824 51. Coulthard, L. G. *et al.* Complement C5aR1 Signalling Promotes  
825 Polarization and Proliferation of Embryonic Neural Progenitor Cells  
826 through PKC $\zeta$ . *J. Neurosci.* **37**, 5395–5407 (2017).



- 827 52. Hawksworth, O. A., Coulthard, L. G., Taylor, S. M., Wolvetang, E. J. &  
828 Woodruff, T. M. Brief Report: Complement C5a Promotes Human  
829 Embryonic Stem Cell Pluripotency in the Absence of FGF2. *Stem Cells*,  
830 **32**, 3278-3284, (2014).
- 831 53. Schafer, D. P. *et al.* Microglia sculpt postnatal neural circuits in an activity  
832 and complement-dependent manner. *Neuron* **74**, 691–705 (2012).
- 833 54. Apps, R. & Strata, P. Neuronal circuits for fear and anxiety - the missing  
834 link. *Nat. Rev.* **16**, 642 (2015).
- 835 55. Smith, K. S., Engin, E., Meloni, E. G. & Rudolph, U. Benzodiazepine-  
836 induced anxiolysis and reduction of conditioned fear are mediated by  
837 distinct GABAA receptor subtypes in mice. *Neuropharmacology* **63**, 250–  
838 258 (2012).
- 839 56. Ahamed, J., Venkatesha, R. T., Thangam, E. B. & Ali, H. C3a Enhances  
840 Nerve Growth Factor-Induced NFAT Activation and Chemokine  
841 Production in a Human Mast Cell Line, HMC-1. *J. Immunol.* **172**, 6961–  
842 6968 (2004).
- 843 57. Wu, F. *et al.* Complement component C3a plays a critical role in  
844 endothelial activation and leukocyte recruitment into the brain. *J*  
845 *Neuroinflammation* **13**, 23 (2016).
- 846 58. Hamshere, M. L. *et al.* Genome-wide significant associations in  
847 schizophrenia to ITIH3/4, CACNA1C and SDCCAG8, and extensive  
848 replication of associations reported by the Schizophrenia PGC. *Mol.*  
849 *Psychiatry* **18**, 708-712, (2019).
- 850 59. Kabir, Z. D. *et al.* Rescue of impaired sociability and anxiety-like behavior  
851 in adult *cacna1c*-deficient mice by pharmacologically targeting eIF2 $\alpha$ .  
852 *Mol. Psychiatry* **22**, 1096–1109 (2017).
- 853 60. Simms, B. A. & Zamponi, G. W. Neuronal Voltage-Gated Calcium  
854 Channels: Structure, Function, and Dysfunction. *Neuron* **82**, 24–45  
855 (2014).
- 856 61. Chao, T. H. *et al.* Role of the second extracellular loop of human C3a  
857 receptor in agonist binding and receptor function. *Journal of Biological*  
858 *Chemistry* **274**, 9721–9728 (1999).
- 859 62. Hannedouche, S. *et al.* Identification of the C3a Receptor (C3AR1) as the  
860 Target of the VGF-derived Peptide TLQP-21 in Rodent Cells. *Journal of*  
861 *Biological Chemistry* **288**, 27434–27443 (2013).
- 862 63. Cero, C. *et al.* The TLQP-21 peptide activates the G-protein-coupled  
863 receptor C3aR1 via a folding-upon-binding mechanism. *Structure* **22**,  
864 1744–1753 (2014).
- 865 64. Razzoli, M. *et al.* Implication of the VGF-derived peptide TLQP-21 in  
866 mouse acute and chronic stress responses. *Behav. Brain Res.* **229**, 333–  
867 339 (2012).
- 868 65. van den Pol, A. N., Bina, K., Decavel, C. & Ghosh, P. VGF expression in  
869 the brain. *J. Comp. Neurol.* **347**, 455–469 (1994).
- 870 66. Lewis, B., Francis, K., Gasque, P., Scanlon, M. & Ham, J. Functional  
871 complement C3a receptors in the rat pituitary gland. *Endocrine Abstracts*  
872 **3**, 198 (2002).
- 873 67. Francis, K. Complement C3a receptors in the pituitary gland: a novel  
874 pathway by which an innate immune molecule releases hormones  
875 involved in the control of inflammation. *The FASEB Journal*, **17**, 2266-  
876 2268 (2003).

- 877 68. Coulthard, L. G., Hawksworth, O. A. & Woodruff, T. M. Complement: The  
878 Emerging Architect of the Developing Brain. *Trends Neurosci.* **41**, 373–  
879 384 (2018).
- 880 69. Scholz, B. *et al.* The Regulation of Cytokine Networks in Hippocampal  
881 CA1 Differentiates Extinction from Those Required for the Maintenance  
882 of Contextual Fear Memory after Recall. *PLoS ONE* **11**, e0153102–29  
883 (2016).
- 884 70. Ames, R. S. *et al.* Identification of a selective nonpeptide antagonist of  
885 the anaphylatoxin C3a receptor that demonstrates antiinflammatory  
886 activity in animal models. *J. Immunol.* **166**, 6341–6348 (2001).
- 887 71. Therien, A. G., Baelder, R. & Köhl, J. Agonist Activity of the Small  
888 Molecule C3aR Ligand SB 290157. *J. Immunol.* **174**, 7479–7480 (2005).
- 889 72. Holly, K. S., Orndorff, C. O. & Murray, T. A. MATSAP: An automated  
890 analysis of stretch-attend posture in rodent behavioral experiments.  
891 *Scientific Reports* **6**, (2016).
- 892 73. Genewsky, A. *et al.* How much fear is in anxiety? Preprint at  
893 [https://doi:10.1101/385823](https://doi.org/10.1101/385823) (2018).
- 894 74. Hong, S. *et al.* Complement and microglia mediate early synapse loss in  
895 Alzheimer mouse models. *Science* **352**, 712–716 (2016).
- 896 75. Kopec, A. M., Smith, C. J., Ayre, N. R., Sweat, S. C. & Bilbo, S. D.  
897 Microglial dopamine receptor elimination defines sex-specific nucleus  
898 accumbens development and social behavior in adolescent rats. *Nature*  
899 *Communications* **9**, 3769 (2018).
- 900 76. Zhang, J. *et al.* Microglial CR3 Activation Triggers Long-Term Synaptic  
901 Depression in the Hippocampus via NADPH Oxidase. *Neuron* **82**, 195–  
902 207 (2014).
- 903 77. Roussos, P., Giakoumaki, S. G., Georgakopoulos, A., Robakis, N. K. &  
904 Bitsios, P. The CACNA1C and ANK3 risk alleles impact on affective  
905 personality traits and startle reactivity but not on cognition or gating in  
906 healthy males. *Bipolar Disorders* **13**, 250–259 (2011).
- 907 78. Bader, P. L. *et al.* Mouse model of Timothy syndrome recapitulates triad  
908 of autistic traits. *Proc. Natl. Acad. Sci. U.S.A.* **108**, 15432–15437 (2011).
- 909 79. Lee, A. S. *et al.* Forebrain elimination of cacna1c mediates anxiety-like  
910 behavior in mice. *Nat. Neurosci* **17**, 1054–1055 (2012).
- 911 80. Dao, D. T. *et al.* Mood Disorder Susceptibility Gene CACNA1C Modifies  
912 Mood-Related Behaviors in Mice and Interacts with Sex to Influence  
913 Behavior in Mice and Diagnosis in Humans. *Biological Psychiatry* **68**,  
914 801–810 (2010).
- 915 81. Dedic, N. *et al.* Cross-disorder risk gene CACNA1C differentially  
916 modulates susceptibility to psychiatric disorders during development and  
917 adulthood. *Nat. Neurosci* **23**, 533–543 (2018).
- 918 82. Crider, A. *et al.* Complement component 3a receptor deficiency  
919 attenuates chronic stress-induced monocyte infiltration and depressive-  
920 like behavior. *Brain, Behavior, and Immunity* **70**, 246–256 (2018).
- 921 83. Sellgren, C. M. *et al.* Increased synapse elimination by microglia in  
922 schizophrenia patient-derived models of synaptic pruning. *Nat. Neurosci*,  
923 **22**, 374–385, (2019).
- 924 84. Wang, Y. *et al.* A role for complement in antibody-mediated inflammation:  
925 C5-deficient DBA/1 mice are resistant to collagen-induced arthritis. *J.*  
926 *Immunol.* **164**, 4340–4347 (2000).



- 927 85. Mikaelsson, M. A., Constancia, M. C. A., Dent, C. L., Wilkinson, L. S. &  
928 Humby, T. Placental programming of anxiety in adulthood revealed by  
929 Igf2-null models. *Nature Communications* **4**, 1–9 (2013).
- 930 86. Molewijk, H. E., van der Poel, A. M. & Olivier, B. The ambivalent  
931 behaviour ‘stretched approach posture’ in the rat as a paradigm to  
932 characterize anxiolytic drugs. *Psychopharmacology* **121**, 81–90, (1995).
- 933 87. Mackintosh, J. H. & Grant, E. C. A Comparison of the Social Postures of  
934 Some Common Laboratory Rodents. *Behaviour* **21**, 246–259 (1963).
- 935 88. Kleiber, M. Body size and metabolism. *Hilgardia Journal of Agricultural  
936 Science*, **6**, 315-353 (1932).
- 937 89. Dickmeis, T. Glucocorticoids and the circadian clock. *Journal of  
938 Endocrinology* **200**, 3–22 (2008).
- 939 90. Livak, K. J. & Schmittgen, T. D. Analysis of Relative Gene Expression  
940 Data Using Real-Time Quantitative PCR and the 2- $\Delta\Delta$ CT Method.  
941 *Methods* **25**, 402–408 (2001).
- 942 91. Wright, S. P. Adjusted p-values for simultaneous inference. *Biometrics*  
943 **48**, 1005–1013 (1992).
- 944

945

946

947

948

949

950

951

952

953

954

955

956

957

958

959

960

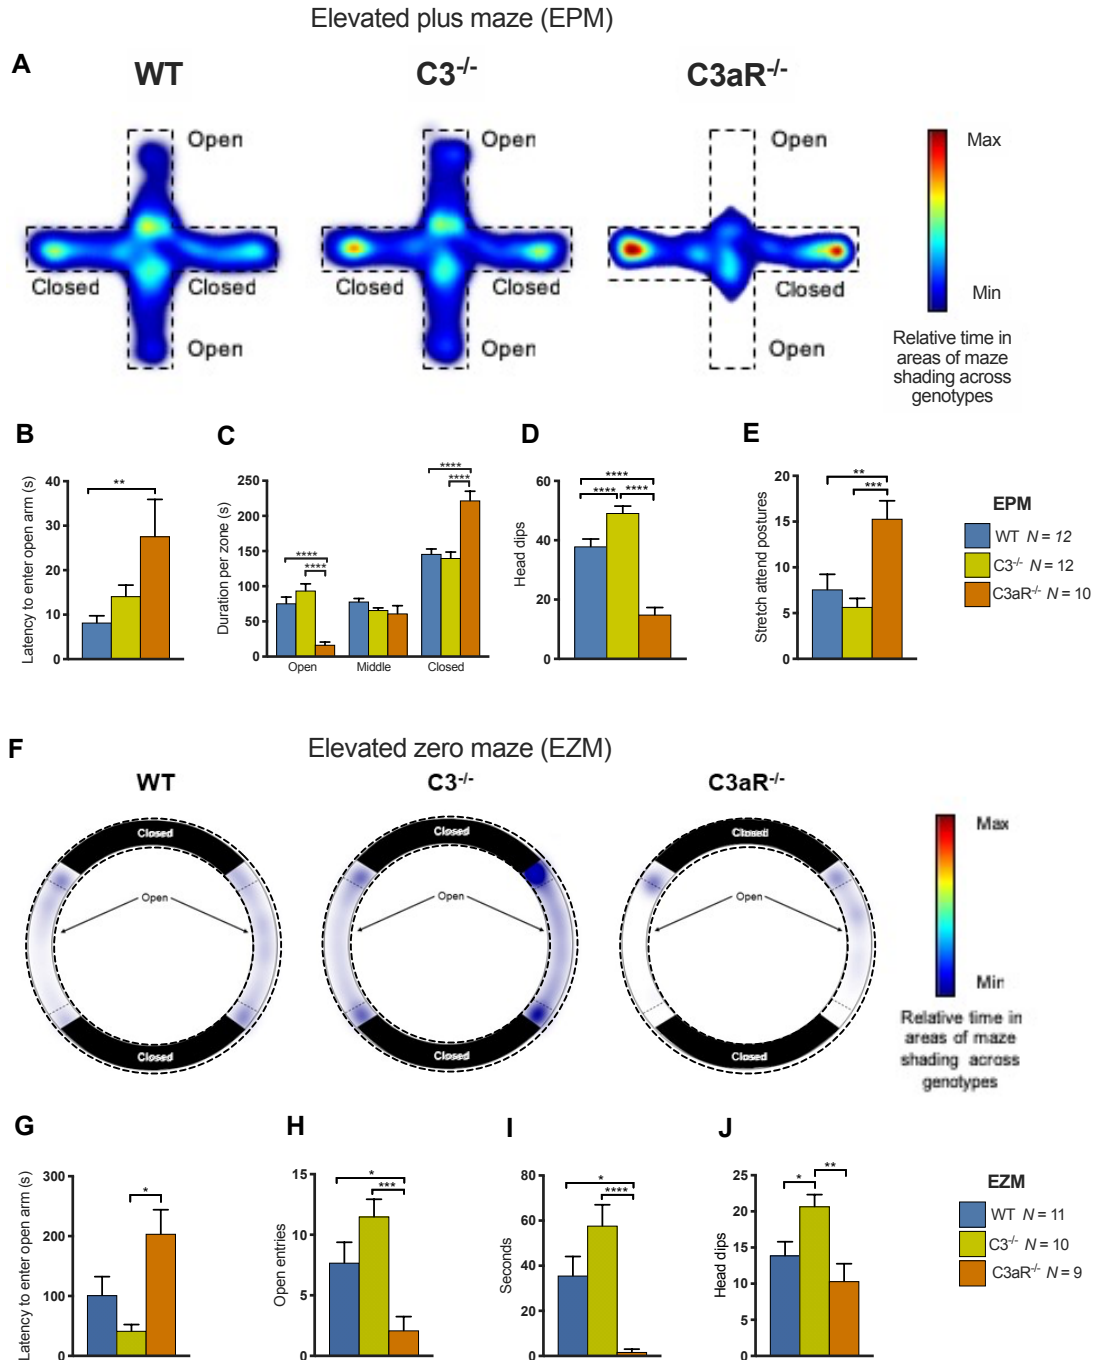

961

962 **Figure 1. C3aR<sup>-/-</sup>, but not C3<sup>-/-</sup> mice show increased anxiety-like behaviour in the**

963 **elevated plus maze (EPM;A-E) and elevated zero maze (EZM;F-J). (A) Heatmaps**

964 **displaying relative time per zone of the EPM across genotypes (B) Latency to first**

965 **open arm visit; wildtype 8.21±1.53s, C3<sup>-/-</sup> 14.1±2.52s, C3aR<sup>-/-</sup> 27.6±8.31s, (H<sub>2</sub>=10.5,**

966 **p=0.005). Post hoc tests demonstrated that C3aR<sup>-/-</sup> mice took significantly longer to**

967 first enter the open arms than wildtype mice ( $p=0.0045$ ). **(C)**  $C3aR^{-/-}$  mice distributed  
968 their time across the EPM differently to wildtype and  $C3^{-/-}$  mice (GENOTYPE $\times$ ZONE,  
969  $F_{4,62}=17.7$ ,  $p=0.0001$ ) spending less time in the open arms ( $C3aR^{-/-}$   $16.70\pm 3.73s$  vs.  
970 wildtype  $75.78\pm 8.86s$ ,  $p<0.0001$ ,  $C3aR^{-/-}$  vs.  $C3^{-/-}$   $93.86\pm 9.59s$   $p<0.0001$ ) and  
971 significantly more time in the closed arms ( $C3aR^{-/-}$   $221.88\pm 12.06s$  vs. wildtype  
972  $146.01\pm 7.01s$ ,  $p<0.0001$ , and  $C3^{-/-}$   $140.04\pm 8.61s$   $p<0.0001$ ). **(D)**  $C3aR^{-/-}$  ( $14.90\pm 2.22$ )  
973 mice performed significantly fewer head dips than wildtype ( $37.92\pm 2.53$ ,  $p<0.0001$ )  
974 and  $C3^{-/-}$  mice ( $49.17\pm 2.37$ ,  $p<0.0001$ ), whereas  $C3^{-/-}$  mice performed significantly  
975 more head dips than wildtype mice ( $p=0.0061$ ; overall ANOVA  $F_{2,31}=48.0$ ,  $p<0.0001$ ).  
976 **(E)**  $C3aR^{-/-}$  mice performed significantly more stretch attend postures (SAPs;  
977  $15.30\pm 1.80$ ) than wildtype ( $7.58\pm 1.66$ ,  $p=0.0042$ ) and  $C3^{-/-}$  mice ( $5.67\pm 0.94$ ,  $p=0.0004$ ;  
978 overall ANOVA  $F_{2,31}=10.3$ ,  $p=0.0004$ ). **(F)** Heatmaps displaying relative exploration of  
979 the open segments of the elevated zero maze, across genotypes. Note that due to the  
980 height of the walls in the closed regions it was not possible to track mice or observe  
981 ethological behaviours such as grooming or SAPs. **(G)** There was a significant  
982 difference in the latency to first enter the open arms (wildtype  $101.00\pm 31.00s$ ,  $C3^{-/-}$   
983  $42.00\pm 2.52s$ ,  $C3aR^{-/-}$   $204.00\pm 40.40s$ ,  $H_2=8.13$ ,  $p=0.0171$ ). *Post hoc* tests revealed  
984 that  $C3aR^{-/-}$  mice took significantly longer than  $C3^{-/-}$  mice to initially enter the open  
985 region ( $p=0.0140$ ). **(H)** The number of entries made to open regions differed between  
986 genotypes (wildtype  $7.69\pm 1.69$ ,  $C3^{-/-}$   $11.5\pm 1.43s$ ,  $C3aR^{-/-}$   $2.10\pm 1.15$ ,  $F_{2,30}=8.96$ ,  
987  $p=0.0009$ ).  $C3aR^{-/-}$  mice made significantly fewer entries to the open areas than  
988 wildtype ( $p=0.0324$ ) and  $C3^{-/-}$  mice ( $p=0.0006$ ) and **(I)** spent significantly less time on  
989 the open arms ( $1.77\pm 1.29$ ) compared to wildtype ( $35.7\pm 8.43s$ ,  $p=0.0132$ ) and  $C3^{-/-}$   
990 ( $57.7\pm 9.32s$ ,  $p<0.0001$ ; overall Kruskal-Wallis test  $H_2=19.2$ ,  $p<0.0001$ ). **(J)**  $C3^{-/-}$  mice

991 performed significantly more head dips ( $20.7 \pm 1.62$ ) than wildtype ( $13.9 \pm 1.89$ ,  
992  $p=0.048$ ) and  $C3aR^{-/-}$  mice ( $10.3 \pm 2.42$ ,  $p=0.0034$ ; overall ANOVA  
993  $F_{2,27}=6.86, p=0.0039$ ). Data are mean  $\pm$  S.E.M. \*, \*\*, \*\*\* and \*\*\*\* represent  $p \leq 0.05$ ,  
994  $p \leq 0.01$ ,  $p \leq 0.001$  and  $p \leq 0.0001$  for *post-hoc* genotype comparisons, respectively.

995  
996  
997  
998  
999  
1000  
1001  
1002  
1003  
1004  
1005  
1006  
1007  
1008  
1009  
1010  
1011  
1012  
1013  
1014  
1015  
1016  
1017  
1018  
1019  
1020  
1021  
1022  
1023  
1024  
1025  
1026

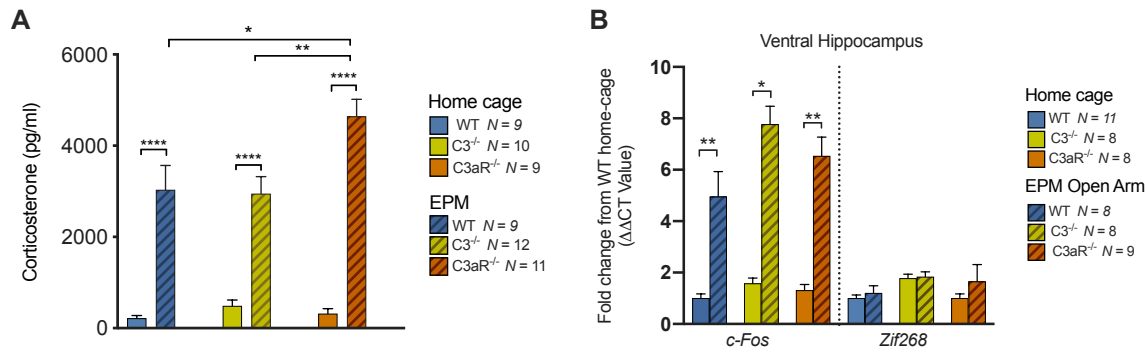

1027  
1028  
1029

1030 **Figure 2. Neuroendocrine response and neuronal activation following exposure**

1031 **to the elevated plus maze (A)** 5-minute exposure to the EPM significantly elevated

1032 corticosterone in all genotypes (main effect of CONDITION,  $F_{1,54}=143$ ,  $p<0.0001$ ;

1033 baseline  $344.66\pm63.70$  vs. EPM  $3553.84\pm274.13$ ). There was a significant

1034 GENOTYPE  $\times$  CONDITION interaction ( $F_{2,54}=4.64$ ,  $p=0.0138$ ). *Post hoc* analysis

1035 showed that after the EPM, C3aR<sup>-/-</sup> mice demonstrated significantly higher

1036 corticosterone levels ( $4640.27\pm376.13$ ) than wildtype ( $3033.78\pm535.06$ ,  $p=0.0127$ )

1037 and C3<sup>-/-</sup> mice ( $2948.00\pm374.87$ ,  $p=0.0032$ ). *Post hoc* tests also indicated that there

1038 were no baseline differences between genotypes (wildtype  $216.54\pm63.2$  vs. C3aR<sup>-/-</sup>

1039  $316.17\pm111.60$   $p>0.9999$ , wildtype vs. C3<sup>-/-</sup>  $p=0.9927$ , and C3<sup>-/-</sup>  $485.60\pm130.35$

1040 vs. C3aR<sup>-/-</sup> mice  $p=0.9992$ ). (B) A separate group of animals were taken from their

1041 home-cages and culled immediately or placed on the open arm of the EPM for 5

1042 minutes and culled 25 minutes later. c-Fos mRNA was significantly upregulated after

1043 exposure to the EPM across genotypes (main effect of CONDITION,  $F_{1,46}=45.4$ ,

1044  $p<0.0001$ ). There was no significant main effect of GENOTYPE ( $F_{2,46}=1.27$ ,  $p=0.2894$ )

1045 and no CONDITION  $\times$  GENOTYPE interaction ( $F_{2,46}=0.0004$ ,  $p=0.9996$ ). Zif268

1046 mRNA was not altered in EPM exposed animals, nor between genotypes. Data

1047 represent mean + S.E.M or fold change from wildtype home-cage + SEM. \*, \*\*, and

1048 \*\*\*\* represent  $p \leq 0.05$ ,  $p \leq 0.01$  and  $p \leq 0.0001$  for *post-hoc* genotype comparisons,

1049 respectively.

1050

1051

1052

1053

1054

1055

1056

1057

1058

1059

1060

1061

1062

1063

1064

1065

1066

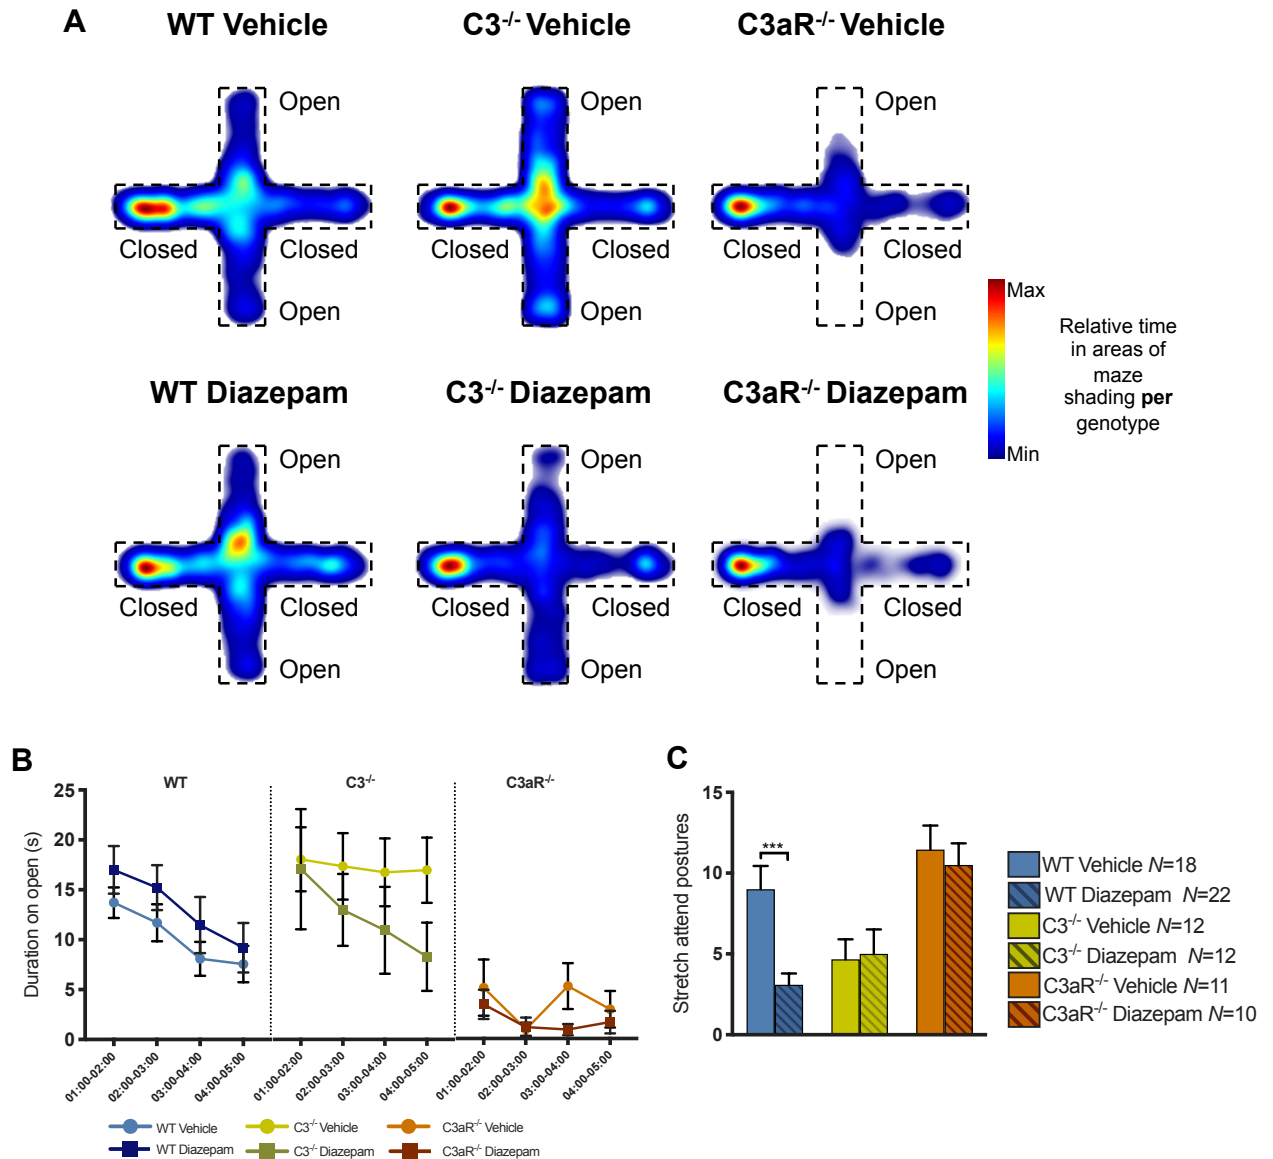1067  
1068

1069 **Figure 3. Altered sensitivity to diazepam in C3aR<sup>-/-</sup> and C3<sup>-/-</sup> mice.** Behaviourally  
 1070 naïve mice were treated with either diazepam (2mg/kg, i.p) or vehicle injections once  
 1071 daily for 2 days and then 30 minutes prior to testing. **(A)** Heatmaps demonstrating  
 1072 duration spent in zones of the maze by vehicle treated and diazepam treated  
 1073 animals **(B)** Plots showing duration spent on open arms in 1-minute time bins (start-  
 1074 01:00 was excluded due to effect of diazepam in delaying initial entry to open arms  
 1075 across genotypes, see Supplementary Figure 4a). There was a trend for wildtype  
 1076 diazepam treated animals to spend more time on the open arms throughout the task

1077 although this did not reach significance (main effect of DRUG,  $F_{1,38}=1.41$ ,  $p=0.2462$ ).  
1078 In  $C3^{-/-}$  mice there was a strong tendency for drug treated animals to explore the  
1079 open arms less than vehicle treated  $C3^{-/-}$  mice (main effect of DRUG,  $F_{1,22}=1.25$ ,  
1080  $p=0.2764$ ). A similar, though less pronounced pattern was seen in  $C3aR^{-/-}$  mice  
1081 (main effect of DRUG,  $F_{1,19}=1.55$ ,  $p=0.2284$ ) **(C)** There were genotype differences in  
1082 SAPs (main effect of GENOTYPE,  $F_{2,79}=10.7$ ,  $p<0.0001$ ), a main effect of DRUG  
1083 ( $F_{1,79}=4.13$ ,  $p=0.0454$ ) and a significant GENOTYPE  $\times$  DRUG interaction ( $F_{2,79}=4.64$ ,  
1084  $p=0.0138$ ). *Post hoc* tests showed that diazepam significantly reduced the number of  
1085 SAPs in wildtype mice only (wildtype vehicle  $9.00\pm 1.44$  vs. wildtype diazepam  
1086  $3.09\pm 0.71$ ,  $p=0.0006$ ,  $C3^{-/-}$  vehicle  $4.67\pm 1.24$  vs.  $C3^{-/-}$  diazepam  $5.00\pm 1.51$ ,  
1087  $p=0.9975$ ,  $C3aR^{-/-}$  vehicle  $11.45\pm 1.49$  vs.  $C3aR^{-/-}$  diazepam  $10.50\pm 1.34$ ,  $p=0.9558$ ).  
1088 Data are mean + S.E.M. \*, \*\*, and \*\*\* represent  $p\leq 0.05$ ,  $p\leq 0.01$  and  $p\leq 0.001$  for  
1089 *post-hoc* genotype comparisons, respectively.

1090  
1091  
1092  
1093  
1094  
1095  
1096  
1097  
1098  
1099  
1100  
1101  
1102



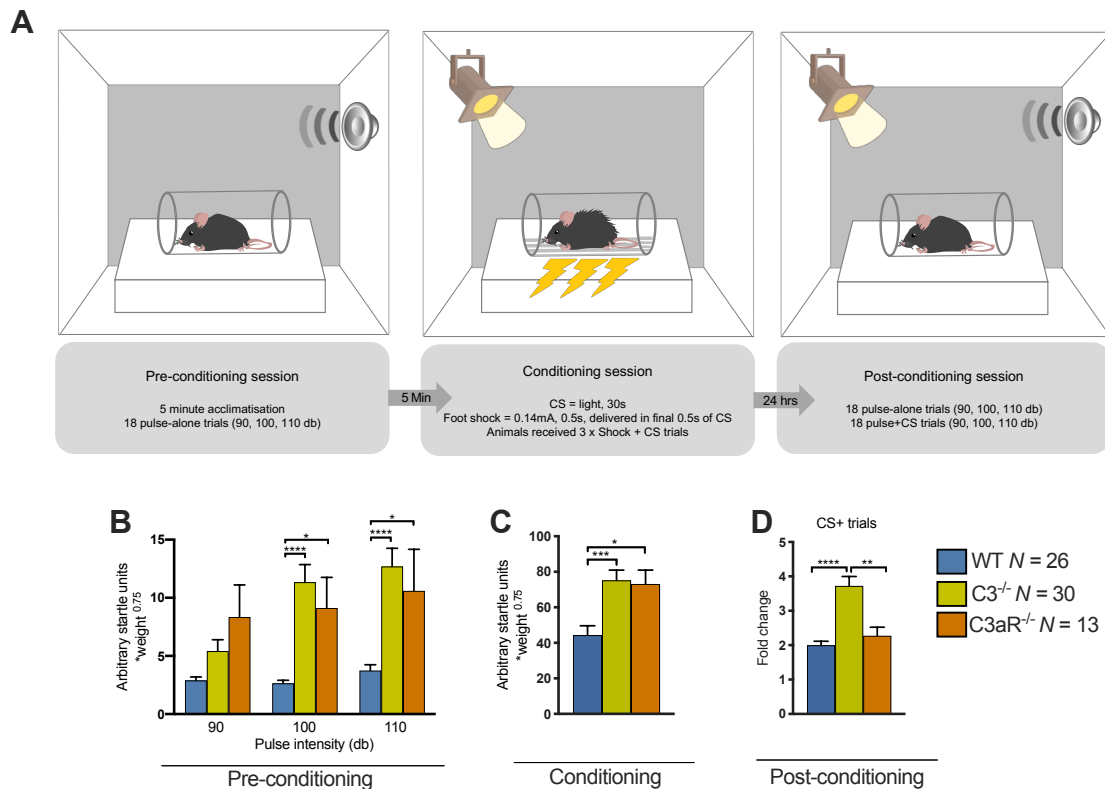

1103

1104

1105 **Figure 4. Enhanced fear-potentiated startle in C3<sup>-/-</sup> but not C3aR<sup>-/-</sup> mice. (A)**1106 **Flow chart depicting the FPS protocol used, which took place in three separate sessions**1107 **over two consecutive days. Baseline startle reactivity to a range of pulse intensities**1108 **was assessed in the pre-conditioning session, immediately preceding the conditioning**1109 **session in which a visual stimulus (light) was paired with 3 weak foot shocks. 24 hours**1110 **later, subjects were re-introduced to the same chamber and startle reactivity was**1111 **compared between pulse-alone trials and pulse+CS trials to determine the degree of**1112 **FPS. On all trials, the peak startle response was recorded and normalised for body**1113 **weight differences using Kleiber's 0.75 mass exponent, and fold-changes calculated.**1114 **(B) There was a significant main effect of GENOTYPE ( $F_{2,66}=9.04$ ,  $p=0.0003$ ) and a**1115 **significant GENOTYPE  $\times$  STIMULUS INTENSITY interaction ( $F_{4,132}=7.55$ ,  $p<0.0001$ ).**1116 **C3<sup>-/-</sup> and C3aR<sup>-/-</sup> mice demonstrated increased levels of startle responding relative to**1117 **wildtype mice at 100dB (C3<sup>-/-</sup>  $11.34\pm 1.51$  vs. wildtype  $2.63\pm 0.26$ ,  $p<0.0001$ , C3aR<sup>-/-</sup>**

1118 9.12±2.63 vs. wildtype p=0.0174) and 110dB ( $C3^{-/-}$  12.69±1.55 vs. wildtype 3.74±0.50,  
1119 p<0.0001,  $C3aR^{-/-}$  10.58±3.58 vs. wildtype p=0.0111) **(C)**  $C3^{-/-}$  and  $C3aR^{-/-}$  mice also  
1120 showed increased startle responding to the footshock+CS ( $C3^{-/-}$  75.18±5.73,  $C3aR^{-/-}$   
1121 73.14±7.78) pairings relative to wildtype mice (44.34±5.29,  $C3^{-/-}$  vs. wildtype p=0.0006,  
1122  $C3aR^{-/-}$  vs. wildtype p=0.0137, overall ANOVA  $F_{2,66}=8.7$ , p=0.0004), although it should  
1123 be noted that responses were much greater to these stimuli in all mice than to the  
1124 startle stimuli in the pre-conditioning session. **(D)** In the post-conditioning session, all  
1125 mice demonstrated increases to the pulse+CS stimuli in comparison to pulse-alone  
1126 stimuli, as demonstrated by the fold-change increase in startle responding, however,  
1127 this effect was significantly increased in  $C3^{-/-}$  mice (3.72±0.27) relative to wildtype  
1128 (1.99±0.11, p<0.0001) and  $C3aR^{-/-}$  mice (2.27±0.24, p=0.0056, overall Kruskal-Wallis  
1129 test  $H_2=27.7$ , p<0.0001). Data are mean + S.E.M. \*, \*\*, \*\*\* and \*\*\*\* represent p≤0.05,  
1130 p≤0.01, p≤0.001 and p≤0.0001 for *post-hoc* genotype comparisons, respectively.

1131  
1132  
1133  
1134  
1135  
1136  
1137  
1138

1139

1140

1141

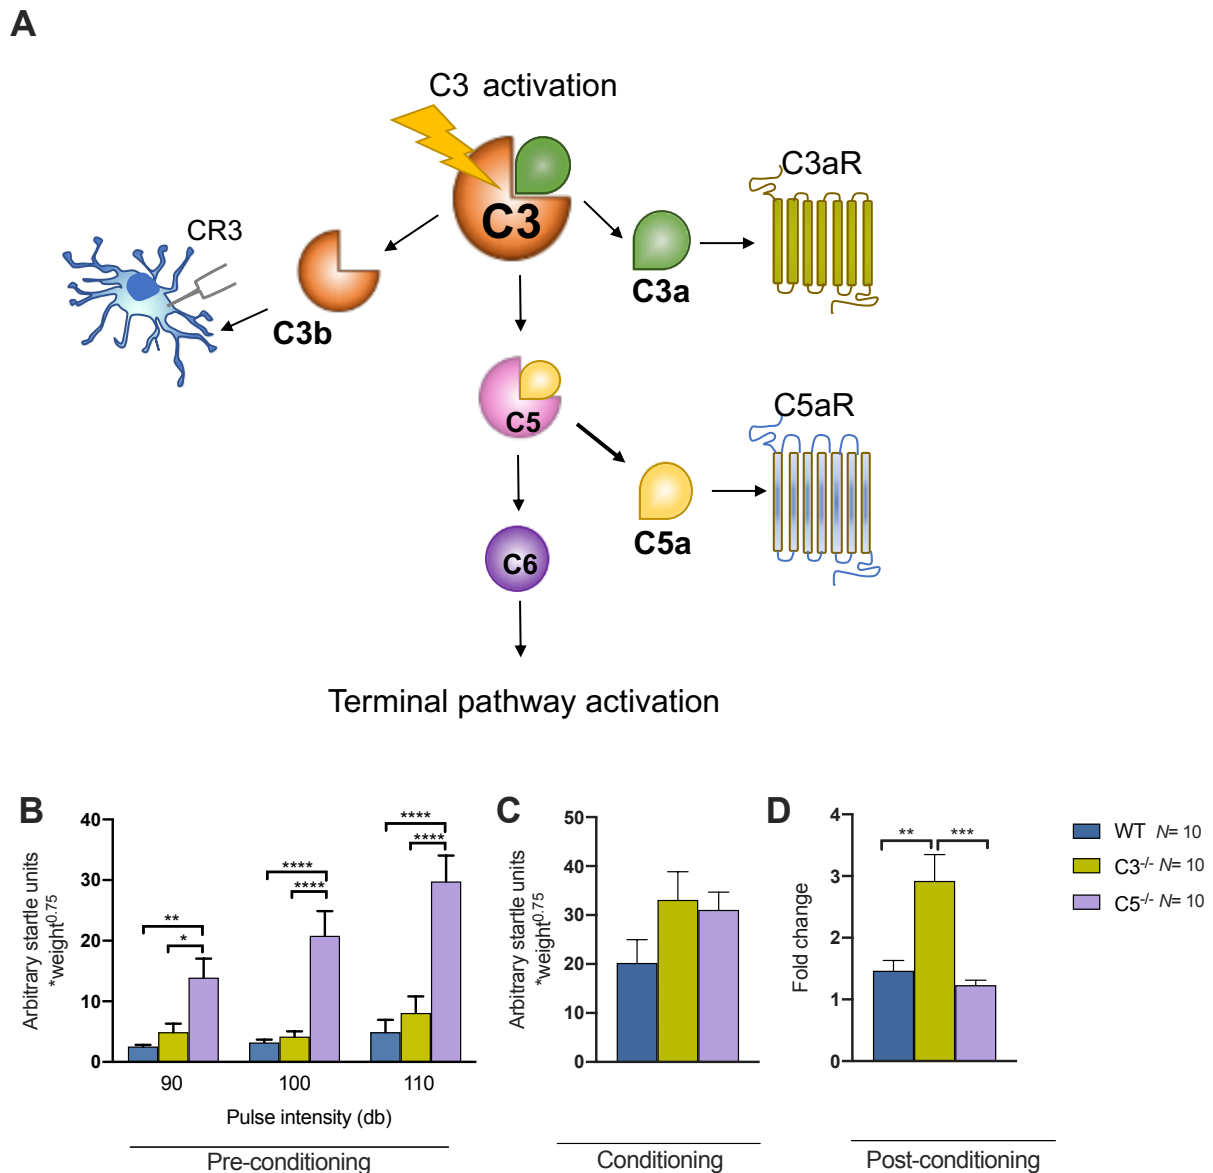

1142

1143 **Figure 5. Pathways underlying fear learning phenotypes in C3<sup>-/-</sup> mice (A)** C3

1144 activation leads to generation of cleavage fragments C3a and C3b. The former signals

1145 via C3aR whereas the latter signals via complement receptor 3 (CR3). C3b is also

1146 necessary for forming the convertase enzyme that cleaves C5. Upon cleavage, C5

1147 generates the fragments C5a and C5b (not shown). C5a signals via the C5aR,

1148 whereas C5b propagates activity of the terminal complement pathway via C6. Since

1149 C3 cannot be activated in C3<sup>-/-</sup> mice, the action of all these pathways (C3a/C3aR,1150 C3b/CR3, C5a/C5aR, terminal pathway) is absent. By using C5<sup>-/-</sup> mice, which lack

1151 C5a/C5aR and terminal pathway activity, we examined whether lack of C3b/CR3,  
1152 C5a/C5aR or the terminal pathway was responsible for fear learning phenotypes in  
1153 C3<sup>-/-</sup> mice. **(B)** In the pre-conditioning session there were significant main effects of  
1154 GENOTYPE ( $F_{2,27}=18.4$ ,  $p<0.0001$ ) and STIMULUS INTENSITY ( $F_{2,54}=19.0$ ,  
1155  $p<0.0001$ ) and a significant GENOTYPE  $\times$  STIMULUS INTENSITY interaction  
1156 ( $F_{4,54}=7.00$ ,  $p<0.0001$ ). C5<sup>-/-</sup> mice demonstrated increased levels of startle responding  
1157 relative to wildtype and C3<sup>-/-</sup> mice at all stimulus intensities (90dB; WT  $2.55\pm 0.26$  vs.  
1158 C5<sup>-/-</sup>  $13.92\pm 3.14$ ,  $p=0.0069$ , C3<sup>-/-</sup>  $4.92\pm 1.40$  vs. C5<sup>-/-</sup>  $p=0.0405$ , WT vs. C3<sup>-/-</sup>  $p=0.7919$ ;  
1159 100dB; WT  $3.23\pm 0.45$  vs. C5<sup>-/-</sup>  $20.83\pm 4.07$ ,  $p<0.0001$ , C3<sup>-/-</sup>  $4.924.17\pm 0.88$  vs. C5<sup>-/-</sup>  
1160  $p<0.0001$ , WT vs. C3<sup>-/-</sup>  $p=0.9639$ ; 110dB; WT  $4.92\pm 2.03$  vs. C5<sup>-/-</sup>  $29.78\pm 4.29$ ,  
1161  $p<0.0001$ , C3<sup>-/-</sup>  $8.07\pm 2.76$  vs. C5<sup>-/-</sup>  $p<0.0001$ , WT vs. C3<sup>-/-</sup>  $p=0.6643$ ). **(C)** There were  
1162 no significant differences in startle responses to the footshock+CS pairings during the  
1163 conditioning session (WT  $20.23\pm 4.76$ , C3<sup>-/-</sup>  $33.10\pm 5.74$ , C5<sup>-/-</sup>  $31.08\pm 3.59$ ,  $F_{2,27}=2.10$ ,  
1164  $p=0.1421$ ). **(D)** In the post-conditioning session, all mice demonstrated increases to  
1165 the pulse+CS stimuli in comparison to pulse-alone stimuli, as demonstrated by the  
1166 fold-change increase in startle responding, however, this effect was again significantly  
1167 increased only in C3<sup>-/-</sup> mice ( $2.92\pm 0.43$ ) relative to wildtype ( $1.47\pm 0.17$ ,  $p=0.0020$ ) and  
1168 C5<sup>-/-</sup> mice ( $1.23\pm 0.08$ ,  $p=0.0004$ , overall ANOVA  $F_{2,27}=11.5$ ,  $p=0.0002$ ). Data  
1169 represent mean + S.E.M. \*, \*\*, \*\*\* and \*\*\*\* represent  $p\leq 0.05$ ,  $p\leq 0.01$ ,  $p\leq 0.001$  and  
1170  $p\leq 0.0001$  for *post-hoc* genotype comparisons, respectively.

1171

1172

1173

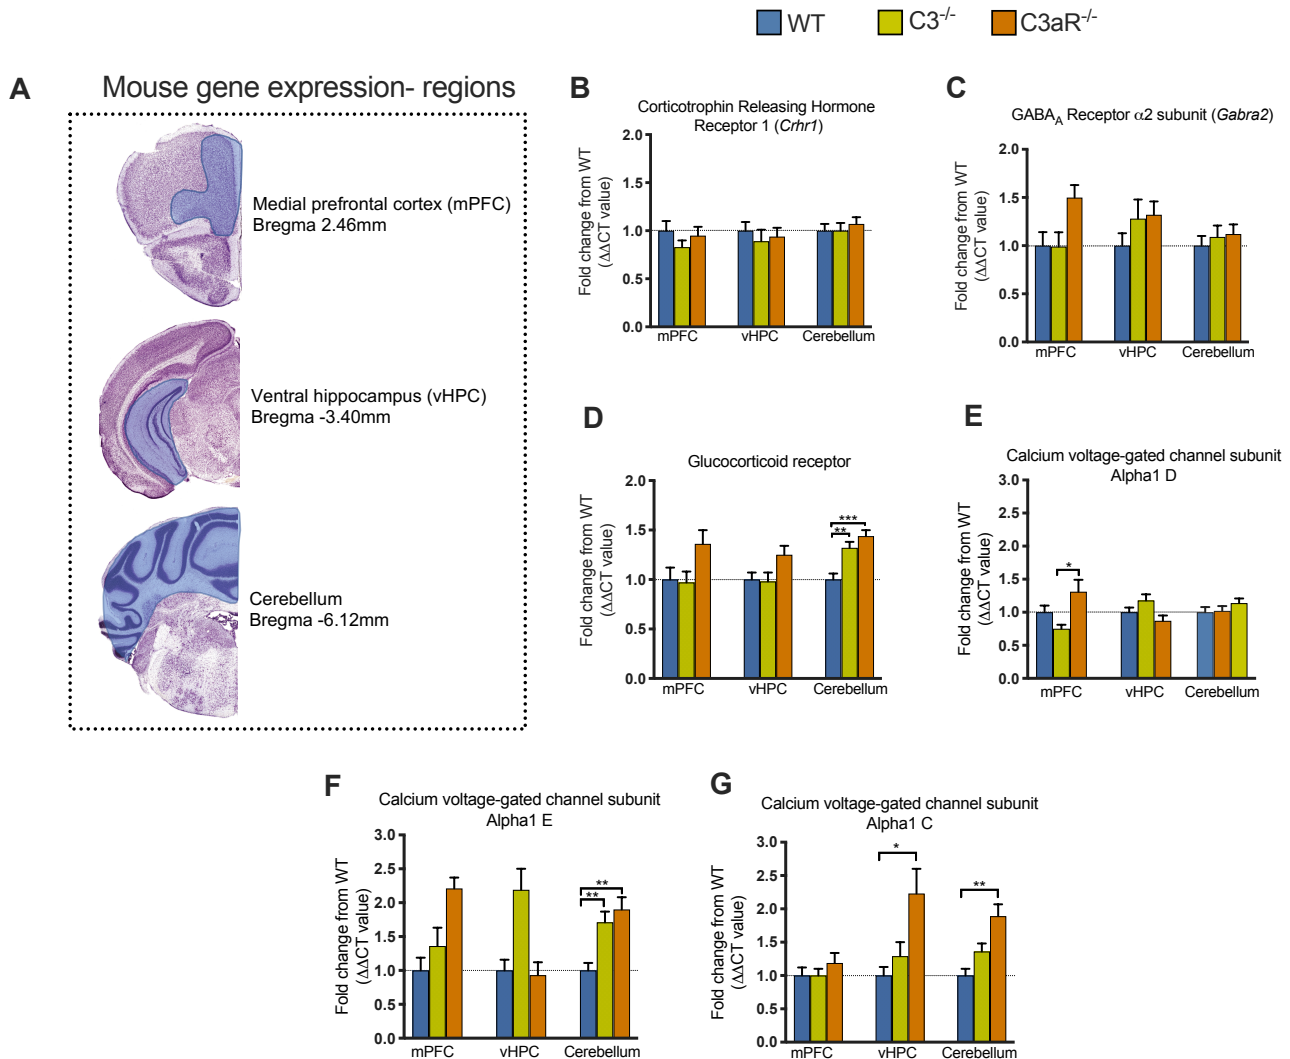

1174

1175 **Figure 6. mRNA expression of stress and anxiety related genes. (A)** Animals were

1176 culled and the medial prefrontal cortex (mPFC), ventral hippocampus (vHPC) and

1177 cerebellum were dissected. **(B)** There were no significant differences in the expression1178 of Corticotrophin releasing hormone receptor 1 (*Crhr1*) in any region, across1179 genotypes (mPFC  $F_{2,53}=0.587$ ,  $p=0.5597$ , N wildtype=20, C3<sup>-/-</sup>=17, C3aR<sup>-/-</sup>= 19; vHPC1180  $F_{2,49}=0.169$ ,  $p=0.8450$ , N WT=20, C3<sup>-/-</sup>=15, C3aR<sup>-/-</sup>= 17; cerebellum  $F_{2,47}=0.0482$ ,1181  $p=0.8346$ , N WT=19, C3<sup>-/-</sup>=17, C3aR<sup>-/-</sup>= 14). **(C)** There were also no significant1182 changes in the expression of the GABA<sub>A</sub> receptor α2 subunit (*Gabra2*) in any region,1183 across genotypes (mPFC  $H_2=1.04$ ,  $p=0.5939$ , N wildtype=20, C3<sup>-/-</sup>=19, C3aR<sup>-/-</sup>= 16;1184 vHPC  $F_{2,49}=0.721$ ,  $p=0.4914$ , N WT=20, C3<sup>-/-</sup>=13, C3aR<sup>-/-</sup>= 19; cerebellum

1185  $F_{2,47}=0.221$ ,  $p=0.8026$ , N WT=18,  $C3^{-/-}$ =17,  $C3aR^{-/-}$ = 15). **(D)** Expression of the  
 1186 glucocorticoid receptor (*Nr3c1*) was significantly increased in the cerebellum of both  
 1187  $C3^{-/-}$  and  $C3aR^{-/-}$  groups ( $F_{2,61}=10.3$ ,  $p=0.0002$ ,  $C3^{-/-}$  vs. wildtype  $p=0.0023$ ,  $C3aR^{-/-}$  vs.  
 1188 wildtype  $p=0.0002$ , N wildtype=19,  $C3^{-/-}$ =20,  $C3aR^{-/-}$ = 15). There were trends towards  
 1189 increased expression of the glucocorticoid receptor gene *Nr3c1* in the mPFC and  
 1190 vHPC of  $C3aR^{-/-}$  mice but these were not significant (mPFC;  $F_{2,56}=1.33$ ,  $p=0.2723$ , N  
 1191 wildtype=20,  $C3^{-/-}$ =20,  $C3aR^{-/-}$ = 19, vHPC;  $F_{2,62}=1.11$ ,  $p=0.3345$ , N wildtype=23,  $C3^{-/-}$   
 1192 =20,  $C3aR^{-/-}$ = 22). **(E)** Calcium voltage-gated channel subunit Alpha 1d (*Cacna1d*)  
 1193 expression was changed in the mPFC ( $F_{2,36}=7.52$ ,  $p=0.0407$ ) owing to altered  
 1194 expression between  $C3^{-/-}$  and  $C3aR^{-/-}$  mice ( $p=0.0314$ ; N wildtype=11,  $C3^{-/-}$ =13,  $C3aR^{-/-}$   
 1195 =15). There were no differences in the vHPC ( $F_{2,31}=2.27$ ,  $p=0.1199$ , N wildtype=14,  
 1196  $C3^{-/-}$ =10,  $C3aR^{-/-}$ = 10) or cerebellum ( $F_{1,39}=0.648$ ,  $p=0.5286$ , N wildtype=14,  $C3^{-/-}$ =16,  
 1197  $C3aR^{-/-}$ = 12). **(F)** Expression of the Calcium voltage-gated channel subunit Alpha 1e  
 1198 (*Cacna1e*) was significantly upregulated in the cerebellum of both knockouts  
 1199 ( $F_{2,39}=7.52$ ,  $p=0.0017$ , wildtype vs.  $C3^{-/-}$   $p=0.0082$ , wildtype vs.  $C3aR^{-/-}$   $p=0.0032$ ; N  
 1200 wildtype=14,  $C3^{-/-}$ =16,  $C3aR^{-/-}$ = 12). There were borderline significant changes in  
 1201 expression in the vHPC ( $F_{2,32}=3.15$ ,  $p=0.0565$ , N wildtype=14,  $C3^{-/-}$ =11,  $C3aR^{-/-}$ = 10)  
 1202 and no significant changes in the mPFC ( $H_2=3.43$ ,  $p=0.1802$ , N wildtype=11,  $C3^{-/-}$ =12,  
 1203  $C3aR^{-/-}$ = 15). **(G)** Expression levels of the Calcium voltage-gated channel subunit  
 1204 Alpha 1c (*Cacna1c*) were significantly increased in  $C3aR^{-/-}$  mice in a regionally specific  
 1205 manner in the vHPC ( $F_{2,47}=3.20$ ,  $p=0.0496$ ,  $C3^{-/-}$  vs. wildtype  $p=0.6895$ ,  $C3aR^{-/-}$  vs.  
 1206 wildtype  $p=0.0295$ , N wildtype=21,  $C3^{-/-}$ =13,  $C3aR^{-/-}$ = 16) and the cerebellum  
 1207 ( $F_{2,54}=5.84$ ,  $p=0.0051$ ,  $C3^{-/-}$  vs. wildtype  $p=0.1613$ ,  $C3aR^{-/-}$  vs. wildtype  $p=0.0024$ , N  
 1208 wildtype=20,  $C3^{-/-}$ =20,  $C3aR^{-/-}$ = 17). There were no significant changes in the mPFC  
 1209 ( $F_{2,52}=1.04$ ,  $p=0.5939$ , N wildtype=20,  $C3^{-/-}$ =19,  $C3aR^{-/-}$ = 16). Data represent fold

1210 change from wildtype + SEM. \*, \*\*, \*\*\* represent  $p \leq 0.05$ ,  $p \leq 0.01$  and  $p \leq 0.001$  for *post-*  
1211 *hoc* genotype comparisons, respectively.

1212

1213

1214

1215

1216

1217

1218

1219

1220

1221
