1 **Complement C3 and C3aR mediate different aspects of emotional**  
2 **behaviours; relevance to risk for psychiatric disorder**

3  
4 Laura J. Westacott<sup>1,4†</sup>, Trevor Humby<sup>1,2†</sup>, Niels Haan<sup>1</sup>, Sophie A. Brain<sup>2</sup>, Emma-Louise  
5 Bush<sup>2</sup>, Margarita Toneva<sup>7</sup>, Andreea-Ingrid Baloc<sup>2</sup>, Anna L. Moon<sup>1</sup>, Jack Reddaway<sup>1,4</sup>,  
6 Michael J. Owen<sup>1</sup>, Jeremy Hall<sup>1,4</sup>, Timothy R. Hughes<sup>3,4</sup>, B. Paul Morgan<sup>3,4,6</sup>, William  
7 P. Gray<sup>1,4,5\$</sup> & Lawrence S. Wilkinson<sup>1,2,4\*\$</sup>

8  
9 <sup>1</sup> Neuroscience and Mental Health Research Institute, MRC Centre for Neuropsychiatric Genetic and  
10 Genomics, School of Medicine, Hadyn Ellis Building, Cardiff University, Cardiff, CF24 4HQ, UK.<sup>2</sup>  
11 Behavioural Genetics Group, Schools of Psychology and Medicine, Cardiff University, Cardiff, CF10  
12 3AT, UK. <sup>3</sup> Complement Biology Group, Systems Immunity Research Institute, School of Medicine,  
13 Cardiff University, CF14 4XW, Cardiff UK. <sup>4</sup> Hodge Centre for Neuropsychiatric Immunology, School of  
14 Medicine, Cardiff University, Cardiff CF24 4HQ, UK. <sup>5</sup> Brain Repair and Intracranial Therapeutics  
15 (BRAIN) Unit, School of Medicine, Cardiff University, CF24 4HQ, UK. <sup>6</sup> UK Dementia Research Institute,  
16 Cardiff University, Cardiff, CF24 4HQ, UK. <sup>7</sup> Institute of Psychiatry, Psychology and Neuroscience,  
17 King's College London, London, SE5 8AF, UK.  
18  
19

20 † These authors contributed equally to the work

21 \$Joint senior authors: Lawrence S. Wilkinson & William P. Gray

22  
23 \*Corresponding author: Lawrence S. Wilkinson

24  
25 Email address: [WilkinsonL@cardiff.ac.uk](mailto:WilkinsonL@cardiff.ac.uk)

26  
27 Address: Neuroscience and Mental Health Research Institute, School of Medicine,  
28 Cardiff University, Cardiff, CF24 4HQ, UK

29  
30 **Key words:** *Complement system, Anxiety, Fear, Stress response.*  
31  
32  
33  
34  
35  
36  
37  
38  
39  
40  
41  
42

43  
44  
45  
46  
47  
48  
49  
50  
51  
52  
53  
54  
55  
56  
57  
58  
59  
60  
61  
62  
63  
64  
65  
66  
67  
68  
69

## Abstract

Complement is a key component of the immune system with roles in inflammation and host-defence. Here we reveal novel functions of complement pathways impacting on emotional reactivity of potential relevance to the emerging links between complement and risk for psychiatric disorder. We used mouse models to assess the effects of manipulating components of the complement system on emotionality. Mice lacking the complement C3a Receptor ( $C3aR^{-/-}$ ) demonstrated a selective increase in unconditioned (innate) anxiety whilst mice deficient in the central complement component C3 ( $C3^{-/-}$ ) showed a selective increase in conditioned (learned) fear. The dissociable behavioural phenotypes were linked to different signalling mechanisms. Effects on innate anxiety were independent of C3a, the canonical ligand for C3aR, consistent with the existence of an alternative ligand mediating innate anxiety, whereas effects on learned fear were due to loss of iC3b/CR3 signalling. Our findings show that specific elements of the complement system and associated signalling pathways contribute differentially to heightened states of anxiety and fear commonly seen in psychopathology.

## 70 **1. Introduction**

71 The complement system is a key component of the immune system that plays a pivotal  
72 role in inflammation and host-defence. Complement activation occurs via several  
73 pathways, all of which lead to cleavage of the central protein, C3 (see Figure S1).  
74 Activation of C3 generates the fragments C3a and C3b. C3a is an anaphylatoxin that  
75 signals via its canonical G-protein coupled receptor C3aR<sup>1</sup>. Activation of this receptor  
76 has been demonstrated to trigger calcium mobilization<sup>2-4</sup>, stimulating an array of  
77 intracellular signalling pathways to induce both pro- and anti-inflammatory effects<sup>1,5</sup>.  
78 C3b on the other hand propagates further complement activation by contributing to the  
79 cleavage of complement component 5 (C5) downstream of C3 and, after further  
80 cleavage to iC3b, plays a role in opsonisation by macrophages and microglia via  
81 complement receptor 3 (CR3). Akin to C3, C5 cleavage generates C5a (another  
82 anaphylatoxin and a ligand for the C5a receptor, C5aR) and C5b, which triggers the  
83 terminal complement pathway by sequentially binding proteins C6, C7, C8 and C9.  
84 These proteins subsequently congregate to assemble the membrane attack complex  
85 (MAC) which ultimately results in destruction of the target cell or pathogen via cell  
86 lysis<sup>6</sup>.

87

88 In the central nervous system evidence is emerging that complement has functions  
89 beyond its canonical immune roles<sup>7</sup>. Neurons, astrocytes and microglia express  
90 complement receptors and regulators, and are also capable of synthesising  
91 complement proteins<sup>8,9</sup>. The expression patterns of these vary over the course of brain  
92 development<sup>10</sup>. Complement impacts a number of neurodevelopmental processes  
93 including neurogenesis<sup>11</sup>, migration<sup>12</sup> and synaptic elimination<sup>13</sup> as well as ongoing  
94 synaptic plasticity processes underlying learning and memory in the adult brain<sup>14</sup>.

95 Furthermore, there is increasing evidence that complement is causally involved in the  
96 pathogenesis of neurodegenerative and psychiatric conditions. In Alzheimer's  
97 disease, genetic variants in complement related loci have been associated with  
98 increased disease risk<sup>15,16</sup>, and complement knockout mice exhibit reduced age-  
99 related synapse loss<sup>17</sup> and neuropathology<sup>18</sup>. Alterations in complement proteins and  
100 activation have also been reported in sera from individuals with autism-spectrum  
101 disorder<sup>19</sup> schizophrenia<sup>20</sup>, major depressive disorder<sup>21</sup>, bipolar disorder<sup>22</sup> and post-  
102 traumatic stress disorder<sup>23</sup>. In the case of schizophrenia, an important finding comes  
103 from elegant genetic work demonstrating that structural variation in the complement  
104 *C4A* locus is associated with risk of developing the disease<sup>24</sup>. C4 cleavage generates  
105 fragments that contribute to the activation of C3, yielding C3a and C3b. Given the  
106 known roles for the iC3b/CR3 pathway in developmental synaptic pruning<sup>13,25</sup>, it has  
107 been suggested that *C4A* variants may impact on psychiatric risk via this mechanism,  
108 with excessive synaptic elimination leading to abnormal connectivity and disruption of  
109 neural networks<sup>24</sup>. Variants in *C3* and putative complement-control genes *CSMD1* and  
110 *CSMD2* have also been implicated in genetic susceptibility for schizophrenia<sup>26,27</sup>.  
111  
112 Altered emotional function, in particular maladaptive anxiety and fear, is a pervasive  
113 and clinically important symptom in schizophrenia and a frequent comorbidity across  
114 several of the DSM-5 and ICD-11 defined disorders. Anxiety and fear exist along a  
115 spectrum of aversive emotional states and can be elicited by differing environmental  
116 factors to result in distinguishable behavioural outputs<sup>28</sup>. Anxiety is characterised by  
117 sustained arousal, hypervigilance and risk assessment surrounding anticipated or  
118 potential threats, while fear is often characterised as an acute response to an  
119 experienced, imminent danger resulting in immediate avoidance, fight or freezing

120 behaviour<sup>29,30</sup>. Whilst there is significant overlap in the neurocircuitry underlying these  
121 states, there are also contributions from distinct neuronal circuitries<sup>28,31</sup>.

122

123 There is previous data suggesting complement may play a role in emotional responses  
124 to aversive circumstances. Mice overexpressing the human *C4A* variant associated  
125 with risk for schizophrenia demonstrated elevated anxiety behaviour<sup>32</sup>. Anxiety  
126 phenotypes have also been reported in mice exposed to excessive pre-natal  
127 complement activity<sup>33</sup> and neurodegeneration-associated anxiety phenotypes are  
128 reduced by complement inhibitors<sup>34</sup>. Furthermore, aged *C3* deficient mice exhibited  
129 lower levels of anxiety alongside enhanced learned fear responses<sup>17</sup>, whereas  
130 increased anxiety has been reported in mice lacking the *C3aR*<sup>35</sup>. These previous  
131 studies suggest that complement can influence both innate and learned aversive  
132 behaviours, however, the precise complement signaling pathways responsible for  
133 effects on these dissociable aspects of emotionality is unknown.

134

135 Utilising the central role of *C3* in complement signalling, we used a combination of  
136 complement knockout mice to functionally parse innate anxiety and learned fear  
137 related phenotypes. In homozygous *C3* knockout mice (*C3*<sup>-/-</sup>)<sup>36</sup> complement cannot be  
138 activated beyond *C3*, and therefore these animals lack *C3* activation fragments (*C3a*,  
139 *C3b*) and downstream activation products (*C5a*, *C5b*) and thus cannot activate the  
140 terminal complement pathway. Phenotypes in this model could therefore be the result  
141 of loss of any of these downstream effector molecules. We compared the *C3*<sup>-/-</sup> model  
142 with homozygous *C3aR* knockout mice (*C3aR*<sup>-/-</sup>)<sup>37</sup>. In these mice, complement is  
143 intact apart from the capacity for *C3a* to bind its canonical receptor *C3aR* and hence  
144 through use of both models, we tested the extent to which phenotypic effects were the

145 result specifically of disrupted C3a/C3aR signalling. A priori, because C3a is an  
146 obligate cleavage fragment of C3, we hypothesised that any phenotypes dependent  
147 on interaction of C3a and C3aR would be apparent in both  $C3^{-/-}$  and  $C3aR^{-/-}$  models.

148

149 Contrary to our initial hypotheses we found clear phenotypic dissociations between  
150 the  $C3^{-/-}$  and  $C3aR^{-/-}$  models dependent on the nature of the emotional behaviour.  
151  $C3aR^{-/-}$  mice displayed a profound innate anxiety phenotype that was lacking in the  
152  $C3^{-/-}$  model. In contrast, when we examined learned fear, where a previously neutral  
153 cue generates a fear response as a result of predicting an aversive outcome, we found  
154 that the dissociation was reversed with the  $C3^{-/-}$  mice exhibiting an enhanced fear  
155 response to a conditioned cue, but no differences between wildtype and  $C3aR^{-/-}$  mice.  
156 This double dissociation in emotionality was linked to distinct underlying complement  
157 signalling mechanisms, with anxiety phenotypes in C3aR mice likely to be independent  
158 of C3a/C3aR signalling raising the possibility of an alternative ligand for C3aR, and  
159  $C3^{-/-}$  effects on learned fear likely the result of alterations in iC3b-CR3 pathway activity.  
160 These findings point to a hitherto unrecognized complexity of complement effects on  
161 brain function and behaviour of relevance to emotional dysfunction in  
162 psychopathology.

163

## 164 **2. Materials and Methods**

165 **2.1 Mouse models and husbandry.** Wildtype and  $C3^{-/-}$  strains were sourced in-house  
166 from Professor B. Paul Morgan and Dr Timothy Hughes (strains originally from The  
167 Jackson Laboratory; B6.PL-Thy1<sup>a</sup>/CyJ stock#000406 and B6;129S4-C3tm1Crr/J  
168 stock#003641 respectively);  $C3aR^{-/-}$  mice were provided by Professor Craig Gerard of  
169 Boston Children's Hospital, USA (strain subsequently provided to The Jackson

170 Laboratory; B6.129S4(C)- *C3ar1*<sup>tm1Cge</sup>/BalouJ; stock#033904). *C5*<sup>-/-</sup> mice (as  
171 described in <sup>38</sup>) were provided by Professor Marina Botto, Imperial College London.  
172 This strain originated from naturally *C5*-deficient DBA/2J mice, that had been  
173 backcrossed to C57Bl/6J. *C3*<sup>-/-</sup>, *C3aR*<sup>-/-</sup> and *C5*<sup>-/-</sup> strains were maintained via  
174 homozygous x homozygous breeding and were on a C57Bl/6J background. In all  
175 experiments, knockout mice were compared to wildtype mice also on a C57Bl/6J  
176 background. Mice were between 3-8 months old during experimental testing and were  
177 kept in a temperature and humidity-controlled vivarium (21±2°C and 50±10%,  
178 respectively) with a 12-hour light-dark cycle (lights on at 07:00hrs/lights off at  
179 19:00hrs). Home cages were environmentally enriched with cardboard tubes, soft  
180 wood blocks and nesting materials and animals were housed in single sex littermate  
181 groups (2-5 mice/cage). Standard laboratory chow and water were available *ad*  
182 *libitum*. All procedures were performed in accordance with the requirements of the UK  
183 Animals (Scientific Procedures) Act (1986).

184

185 **2.2 General behavioural methods.** Testing took place between the hours of 09:00  
186 and 17:00, with random distribution of testing for subjects of different genotypes  
187 throughout the day. Mice were habituated to the test rooms for 30 min prior to testing.  
188 All assays involved individual testing of mice and apparatus was cleaned thoroughly  
189 with a 70% ethanol solution between subjects.

190

191 **2.3 Data collection.** Data for the EPM, EZM and Open Field were collected using  
192 EthoVision XT software (Noldus Information Technology, Netherlands) via a video  
193 camera mounted above the centre of each piece of apparatus. Tracking of each

194 subject was determined as the location of the greater body-proportion (12 frames/s) in  
195 the specific virtual zones of each piece of apparatus.

196

197 **2.4 The elevated plus maze (EPM).** The maze, positioned 300 mm above the floor  
198 and illuminated evenly at 15 lux, was constructed of opaque white Perspex and  
199 consisted of two exposed open arms (175 x 78 mm<sup>2</sup>, length x width, no ledges) and  
200 two equally sized enclosed arms, which had 150 mm high walls<sup>39</sup>. Equivalent arms  
201 were arranged opposite one another. Subjects were placed at the enclosed end of a  
202 closed arm and allowed to freely explore for 5 minutes. Data from each pair of arms  
203 were combined to generate single open and closed arm values (number and duration  
204 of arm entries and latency of first entry to each arm). In addition, the following  
205 parameters were manually scored (by an experimenter positioned at a computer in the  
206 same room as the maze, watching the live-video stream of the test); number of stretch-  
207 attend postures (SAPs; defined as the animal slowly and carefully reaching towards  
208 the open arms in a low, elongated body posture<sup>40,41</sup>) and number of head dips from  
209 the open arms (looking down over the edge of an open arm).

210

211 **2.5 The elevated zero maze (EZM).** The maze, positioned 520 mm above the floor  
212 and illuminated evenly at 15 lux, was constructed of wood and consisted of two  
213 exposed open regions (without ledges; 52 mm wide) and two equally sized enclosed  
214 regions (also 52 mm wide), which had 200 mm high grey opaque walls. The diameter  
215 of the maze was 600mm. Equivalent regions were arranged opposite one another.  
216 Subjects were placed at the border of one of the open and closed regions and allowed  
217 to freely explore for 5 min. Data from each pair of regions were combined to generate  
218 single open and closed region values (number and duration of region entries and



219 latency of first entry to each region). In addition, the number of head dips (as above)  
220 were measured. Due to the high walls of the enclosed sections of the maze, subjects  
221 were not visible to the experimenter when in the closed regions and therefore these  
222 parameters were scored only when a subject was on the open regions.

223

224 **2.6 Locomotor activity (LMA).** LMA was measured in an apparatus consisting of  
225 twelve transparent Perspex chambers (each 210 x 360 x 200 mm, width x length x  
226 height). Two infrared beams were embedded within the walls of each chamber, which  
227 crossed the chamber 30 mm from each end and 10 mm from the chamber floor.  
228 Individual subjects were placed in a designated chamber for a 120 min duration on  
229 three consecutive days. Beam breaks were recorded as an index of activity, using a  
230 computer running custom written BBC Basic V6 programme with additional interfacing  
231 by ARACHNID (Cambridge Cognition Ltd, Cambridge, UK). Data were analysed as  
232 the total number of beam breaks per session per day.

233

234 **2.7 Fear-potentiated startle (FPS).** FPS was assessed using startle chamber  
235 apparatus which consisted of a pair of ventilated and soundproofed SR-LAB startle  
236 chambers (San Diego Instruments, CA, USA) each containing a non-restrictive  
237 Plexiglas cylinder (35 mm in diameter), mounted on a Perspex plinth, into which a  
238 subject was placed. The motor responses of subjects to white noise stimuli (generated  
239 from a speaker 120 mm above the cylinder) were recorded via a piezoelectric  
240 accelerometer, attached centrally below the Plexiglas cylinder, which converted  
241 flexion plinth vibration into electrical signals. The peak startle response, within 200ms  
242 from the onset of each startle presentation, in each trial, was normalized for body  
243 weight differences using Kleiber's 0.75 mass exponent<sup>42</sup> as per<sup>43</sup>. A computer running

244 SR-Lab software (Version 94.1.7.48) was used to programme trials and record data.  
245 A foot shock grid connected to a shock generator (San Diego Instruments, CA, USA)  
246 was inserted into the Plexiglas cylinder before conditioning sessions.  
247  
248 FPS consisted of three separate sessions presented over a two-day period (see Figure  
249 4A). On the first day, mice were given a pre-conditioning session immediately followed  
250 by the conditioning session. The pre-conditioning session started with a 5 min  
251 acclimatisation phase followed by presentation of 3 no-stimulus trials, and then a block  
252 of pulse-alone trials presented at 90, 100 and 110dB (5 of each at 40 ms duration).  
253 Trials were randomly distributed throughout the session and presented with a 60 s  
254 random interval (range 36 s to 88 s). After the pre-conditioning session was complete,  
255 mice were removed from the startle chambers, restraint tubes cleaned, and shock  
256 grids were placed into the Plexiglas cylinders prior to commencing the conditioning  
257 session. The mice were then returned to the startle chambers and subjected to a  
258 session consisting of a 5 min acclimatisation phase followed by 3 CS+shock trials, with  
259 3 no stimulus trials before and after, presented with a 2min random interval (range 1.5  
260 to 3min). The scrambled 0.14 mA, 0.5 s foot shock was delivered in the final 0.5 s of  
261 the 30 s visual CS. Following a 24hr delay, subjects were assessed for FPS in the  
262 post-conditioning session. This session followed the same format as the pre-  
263 conditioning session (5 min acclimatisation phase followed by presentation of 3 no-  
264 stimulus trials, and then a block of pulse-alone trials presented at 90, 100 and 110dB,  
265 with 5 of each at 40 ms duration) however the final block of trials also included  
266 pulse+CS trials at 90, 100 and 110 dB (5 of each), with the startle pulse presented in  
267 the final 40 ms of the CS. FPS was determined as the fold change between pulse-  
268 alone trials and pulse+CS trials within the post-conditioning session.

269

270 **2.8 Corticosterone measurements.** Testing took place between the hours of 10:00  
271 and 14:00 to account for the diurnal pattern of corticosterone release<sup>44</sup>. Mice were  
272 allowed to freely explore the EPM for 5 min, after which they were placed in a holding  
273 cage for a further 25 min before being culled by cervical dislocation. Control mice were  
274 removed from their home cage and immediately culled. There was an equal  
275 distribution of subjects of different genotypes, counterbalanced between the two test  
276 conditions and throughout the testing period. Trunk blood was collected into heparin  
277 tubes (Becton Dickinson, USA) and immediately centrifuged at 4000 rpm for 10 min,  
278 and the supernatant removed and frozen at -80°C until further use. A corticosterone  
279 ELISA was performed according to manufacturer's instructions (ADI-900-097, Enzo  
280 Life Sciences, UK) and analysed using a four-parameter logistic curve plug in  
281 (<https://www.myassays.com/four-parameter-logistic-curve.assay>).

282

283 **2.9 Diazepam study.** Wildtype, *C3<sup>-/-</sup>* and *C3aR<sup>-/-</sup>* were used and were randomly  
284 assigned to either vehicle or drug conditions within each genotype. A three-day dosing  
285 regimen of diazepam (2 mg/kg, i.p., Hameln Pharmaceuticals, UK) or an equivalent  
286 volume of vehicle (0.1 M phosphate buffered saline, pH 7.4) was used, based on pilot  
287 testing in wildtype mice to establish an effective anxiolytic dose with minimal sedative  
288 effects (data not included). Following 2 days of pre-treatment, diazepam or vehicle  
289 was administered 30 min prior to testing on the EPM on the 3<sup>rd</sup> day.

290

291 **2.10 Tissue for gene expression analysis.** Mice were removed from their home cage  
292 and immediately culled via cervical dislocation. Brains were removed and the

293 following regions dissected: medial prefrontal cortex (mPFC), ventral hippocampus  
294 (vHPC) and cerebellum (see Figure 6A) and frozen at -80° until further use.

295

296 **2.11 Quantitative Polymerase Chain Reaction (qPCR).** Gene expression was  
297 analysed using standardised qPCR methods with quantification using the  $2^{-\Delta\Delta Ct}$   
298 method<sup>45</sup>. Brain tissue from the mPFC, vHPC and the cerebellum was analysed. RNA  
299 was extracted using the RNeasy kit (QIAGEN) and was subsequently treated with  
300 DNase to remove genomic DNA (TURBO DNA-free kit, Thermo Fisher Scientific).  
301 RNA was then converted to cDNA (RNA to cDNA EcoDry Premix, Random Hexamers,  
302 Clontech, Takara). cDNA samples were run in triplicate in 96 well reaction plates using  
303 SYBR-Green-based qPCR (SensiFast, HI-ROX, Biorline) according to manufacturer's  
304 instructions using a StepOnePlus System (Applied Biosystems, Thermo Fisher  
305 Scientific). Genotypes were counterbalanced across plates and genes of interest were  
306 run alongside housekeeping genes *Gapdh* and *Hrpt1* for each sample, within the same  
307 reaction plate. All samples were run in triplicate and samples differing by >0.3 Cts  
308 were excluded. The change in expression of genes of interest, after normalisation to  
309 the two house-keeping genes ( $\Delta Ct$ ) was transformed to yield  $2^{-\Delta\Delta Ct}$  values. Relative  
310 changes from wildtype animals were calculated for each gene of interest.

311

312 **2.12 Primers.** Primers were designed to span at least one exon-exon junction and to  
313 match the target sequence only in mouse (Primer-Blast, NCBI) and were synthesised  
314 commercially (Sigma Aldrich). Primer efficiency was determined separately through a  
315 dilution series of cDNA samples from wildtype hippocampus, cerebellum and cortex.  
316 Primers with an efficiency between 90-110% were selected.

317

318 **Table 1.** List of primer sequences used.

| Gene           | Species | Forward                  | Reverse                 |
|----------------|---------|--------------------------|-------------------------|
| <i>Gapdh</i>   | Mouse   | GAACATCATCCCTGCATCCA     | CCAGTGAGCTTCCC GTTCA    |
| <i>Hprt1</i>   | Mouse   | TTGCTCGAGATGTCATGAAGGA   | AATGTAATCCAGCAGGTCAGCAA |
| <i>Gabra2</i>  | Mouse   | AAGCCACTGGAGGAAAACATCT   | TTAGCCAGCACCAACCTGAC    |
| <i>Crhr1</i>   | Mouse   | CTTCAACTCTTTCTGGAGTCCT   | TGGCAGAGCGGACCTCA       |
| <i>Nr3c1</i>   | Mouse   | AAACTCTGCCTGGTGTGCTC     | GGTAATTGTGCTGTCTTCCAC   |
| <i>Cacna1c</i> | Mouse   | ATGGTTCTTGTCAGCATGTTGCGG | TGCAAATGTGGAACCGGTAAGTG |
| <i>Cacna1d</i> | Mouse   | AGAGGACCATGCGAACGAG      | CCTTACCAGAAATAGGGAGTCT  |
| <i>Cacna1e</i> | Mouse   | CTCATGTCACCACCGCTAGG     | TCTGTCTGCACCACCTTTGG    |

319

320 **2.13 Genotyping** Genotyping was performed on post-mortem tail tip samples. Qiagen  
321 DNeasy Blood and Tissue Kits (Qiagen, Manchester, UK) were used to extract  
322 genomic DNA (gDNA) as per the manufacturers standard protocol. For *C3<sup>-/-</sup>* mice, JAX  
323 protocol 27746 was used (common; ATCTTGAGTGCACCAAGCC, wildtype;  
324 GGTTGCAGCAGTCTATGAAGG, mutant; GCCAGAGGCCACTTGTATAG) and for  
325 *C3aR<sup>-/-</sup>* JAX protocol 27638 was used (common; AGCCATTCTAGGGGCGTATT, wild  
326 type reverse; CATGGTTTGGGGTTATTTTCG, mutant reverse;  
327 TTGATGTGGAATGTGTGCGAG). For both genotypes, a touchdown cycling protocol  
328 was used (see JAX protocols for details). Genotyping for *C5<sup>-/-</sup>* mice was performed as  
329 described in <sup>38</sup>.

330

331 **2.14 Statistical analysis.** All statistical analyses were carried out using GraphPad  
332 Prism 8.4.1 (GraphPad Software, CA, USA). Data was assessed for equality of  
333 variances using the Brown-Forsythe test and then appropriate parametric (*t* test, one-  
334 way or two-way ANOVA) or non-parametric (Kruskal-Wallis) tests used. *Post hoc*

335 pairwise comparisons were performed using the Tukey or Dunn's tests for parametric  
336 or non-parametric analyses, respectively. For all analyses, alpha was set to 0.05 and  
337 exact p values were reported unless  $p < 0.0001$ . All p values were multiplicity  
338 adjusted<sup>46</sup>. Data are expressed as mean  $\pm$  standard error of the mean.

339

340 The main between-subjects' factor for all ANOVA analyses was GENOTYPE (WT,  $C3$ <sup>-/-</sup>,  
341  $C3aR$ <sup>-/-</sup>, or  $C5$ <sup>-/-</sup>). For the EPM, LMA and FPS experiments, there were within-  
342 subject factors of ZONE (open, closed, middle), DAY (1,2,3) and STIMULUS  
343 INTENSITY (90, 100, 110 dB) respectively. Analysis of plasma corticosterone by two-  
344 way ANOVA included an additional between subject factor of CONDITION (baseline,  
345 EPM), and for the diazepam experiment, there was an additional between subject  
346 factor of DRUG (diazepam, vehicle). For qPCR analyses,  $\Delta$ Ct values were analysed  
347 by one-way ANOVA.

348

### 349 **3. Results**

350

351 **3.1 Increased innate anxiety in  $C3aR$ <sup>-/-</sup> but not  $C3$ <sup>-/-</sup> mice.** Using a cohort of male  
352 wildtype,  $C3$ <sup>-/-</sup> and  $C3aR$ <sup>-/-</sup> mice we first assessed emotional reactivity in the elevated  
353 plus maze (EPM), a well-established test of innate anxiety in rodents which exploits  
354 the conflict between the drive to explore novel environments and the innate aversion  
355 towards open, brightly lit spaces<sup>47,48</sup>. Heatmaps indexing overall maze exploration  
356 over a 5-minute session demonstrated major differences in open arm exploration  
357 between genotypes (Figure 1A; see Supplementary Video 1 for representative  
358 examples). Notably, in comparison to wildtype and  $C3$ <sup>-/-</sup> mice,  $C3aR$ <sup>-/-</sup> mice took  
359 significantly longer to first enter the open arms (Figure 1B) and spent less time on the

360 open arm per entry (Figure S2A), leading to a reduced overall duration spent in the  
361 open arms (Figure 1C), findings consistent with increased anxiety. The ethological  
362 parameters head dips and stretch attend postures (SAPs) also differed between  
363 genotypes (Figure 1D,E), with *C3aR*<sup>-/-</sup> mice exhibiting decreases in the former and  
364 increases in the latter, a pattern of results again consistent with heightened anxiety<sup>49</sup>.  
365 We also noted a significantly increased frequency of head dipping in *C3*<sup>-/-</sup> mice (Figure  
366 1D), suggestive of reduced levels of anxiety relative to both wildtype and *C3aR*<sup>-/-</sup>  
367 mice<sup>50</sup>.

368

369 These initial data were consistent with an anxiogenic phenotype present in *C3aR*<sup>-/-</sup>  
370 mice but absent in *C3*<sup>-/-</sup> mice. We confirmed the findings in two further independent  
371 tests of anxiety using additional cohorts of animals. First we used the elevated zero  
372 maze (EZM, see Methods Section 2.6), another test of anxiety-like behaviour which  
373 similarly probes behavioural responses to exposed, illuminated spaces<sup>51</sup>. The data  
374 recapitulated the pattern of findings seen in the EPM (Figure 1F-J). Additional data  
375 from the open field test, where *C3aR*<sup>-/-</sup> mice were more likely to avoid the centre of the  
376 arena, were also consistent in demonstrating a specific anxiety-like phenotype in  
377 *C3aR*<sup>-/-</sup> but not *C3*<sup>-/-</sup> mice (Figure S3). Given that several of the measures indexing  
378 anxiety were dependent on movement around the apparatus it was important to  
379 eliminate potential locomotor confounds. To address this issue, we measured activity  
380 independently in a non-anxiety provoking environment and found no differences in  
381 locomotor activity between genotypes (Figure S2C), demonstrating that anxiety  
382 measures were unlikely to be influenced by movement confounds. Importantly,  
383 experiments conducted in female mice demonstrated comparable *C3aR*<sup>-/-</sup> anxiety  
384 phenotypes in both the elevated plus maze and open field (Figure S6&7).

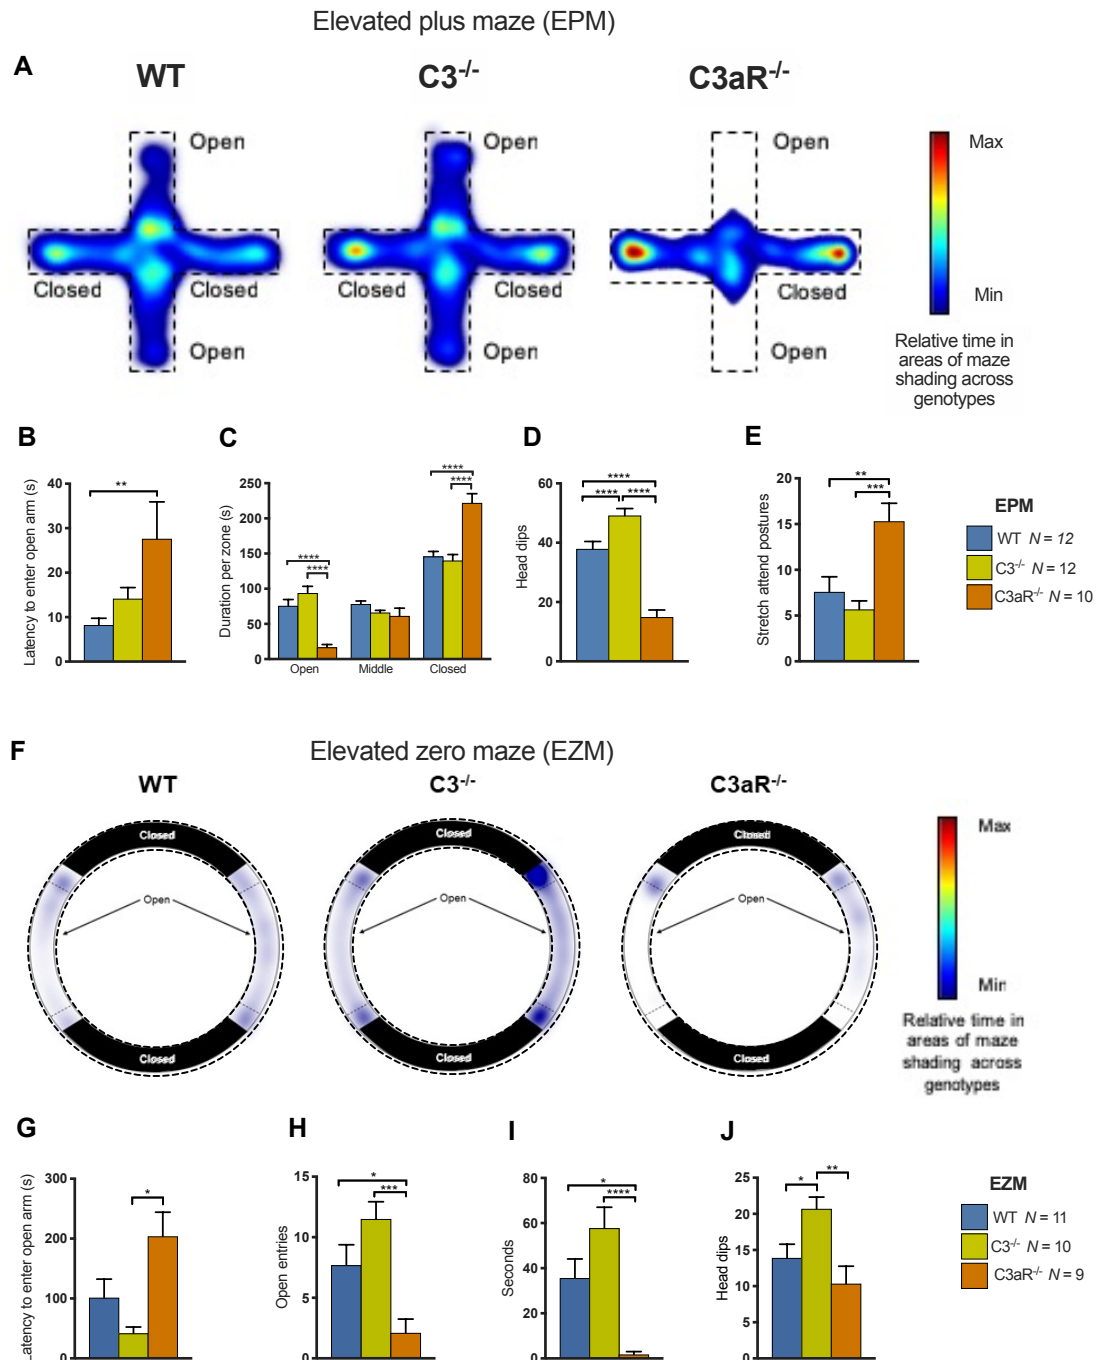

385 **Figure 1. C3aR<sup>-/-</sup>, but not C3<sup>-/-</sup> mice show increased anxiety-like behaviour in the**  
 386 **elevated plus maze (EPM;A-E) and elevated zero maze (EZM;F-J).** (A) Heatmaps  
 387 displaying relative time per zone of the EPM across genotypes (B) Latency to first  
 388 open arm visit; wildtype 8.21±1.53s, C3<sup>-/-</sup> 14.1±2.52s, C3aR<sup>-/-</sup> 27.6±8.31s, (H<sub>2</sub>=10.5,  
 389 p=0.005). *Post hoc* tests demonstrated that C3aR<sup>-/-</sup> mice took significantly longer to  
 390 first enter the open arms than wildtype mice (p=0.0045). (C) C3aR<sup>-/-</sup> mice distributed



391 their time across the EPM differently to wildtype and  $C3^{-/-}$  mice (GENOTYPE $\times$ ZONE,  
392  $F_{4,62}=17.7$ ,  $p=0.0001$ ) spending less time in the open arms ( $C3aR^{-/-}$   $16.70\pm 3.73s$  vs.  
393 wildtype  $75.78\pm 8.86s$ ,  $p<0.0001$ ,  $C3aR^{-/-}$  vs.  $C3^{-/-}$   $93.86\pm 9.59s$   $p<0.0001$ ) and  
394 significantly more time in the closed arms ( $C3aR^{-/-}$   $221.88\pm 12.06s$  vs. wildtype  
395  $146.01\pm 7.01s$ ,  $p<0.0001$ , and  $C3^{-/-}$   $140.04\pm 8.61s$   $p<0.0001$ ). **(D)**  $C3aR^{-/-}$  ( $14.90\pm 2.22$ )  
396 mice performed significantly fewer head dips than wildtype ( $37.92\pm 2.53$ ,  $p<0.0001$ )  
397 and  $C3^{-/-}$  mice ( $49.17\pm 2.37$ ,  $p<0.0001$ ), whereas  $C3^{-/-}$  mice performed significantly  
398 more head dips than wildtype mice ( $p=0.0061$ ; overall ANOVA  $F_{2,31}=48.0$ ,  $p<0.0001$ ).  
399 **(E)**  $C3aR^{-/-}$  mice performed significantly more stretch attend postures (SAPs;  
400  $15.30\pm 1.80$ ) than wildtype ( $7.58\pm 1.66$ ,  $p=0.0042$ ) and  $C3^{-/-}$  mice ( $5.67\pm 0.94$ ,  $p=0.0004$ ;  
401 overall ANOVA  $F_{2,31}=10.3$ ,  $p=0.0004$ ). **(F)** Heatmaps displaying relative exploration of  
402 the open segments of the elevated zero maze, across genotypes. Note that due to the  
403 height of the walls in the closed regions it was not possible to track mice or observe  
404 ethological behaviours such as grooming or SAPs. **(G)** There was a significant  
405 difference in the latency to first enter the open arms (wildtype  $101.00\pm 31.00s$ ,  $C3^{-/-}$   
406  $42.00\pm 2.52s$ ,  $C3aR^{-/-}$   $204.00\pm 40.40s$ ,  $H_2=8.13$ ,  $p=0.0171$ ). *Post hoc* tests revealed  
407 that  $C3aR^{-/-}$  mice took significantly longer than  $C3^{-/-}$  mice to initially enter the open  
408 region ( $p=0.0140$ ). **(H)** The number of entries made to open regions differed between  
409 genotypes (wildtype  $7.69\pm 1.69$ ,  $C3^{-/-}$   $11.5\pm 1.43s$ ,  $C3aR^{-/-}$   $2.10\pm 1.15$ ,  $F_{2,30}=8.96$ ,  
410  $p=0.0009$ ).  $C3aR^{-/-}$  mice made significantly fewer entries to the open areas than  
411 wildtype ( $p=0.0324$ ) and  $C3^{-/-}$  mice ( $p=0.0006$ ) and **(I)** spent significantly less time on  
412 the open arms ( $1.77\pm 1.29$ ) compared to wildtype ( $35.7\pm 8.43s$ ,  $p=0.0132$ ) and  $C3^{-/-}$   
413 ( $57.7\pm 9.32s$ ,  $p<0.0001$ ; overall Kruskal-Wallis test  $H_2=19.2$ ,  $p<0.0001$ ). **(J)**  $C3^{-/-}$  mice  
414 performed significantly more head dips ( $20.7\pm 1.62$ ) than wildtype ( $13.9\pm 1.89$ ,

415  $p=0.048$ ) and  $C3aR^{-/-}$  mice ( $10.3\pm 2.42$ ,  $p=0.0034$ ; overall ANOVA  
416  $F_{2,27}=6.86, p=0.0039$ ). Data are mean  $\pm$  S.E.M. \*, \*\*, \*\*\* and \*\*\*\* represent  $p\leq 0.05$ ,  
417  $p\leq 0.01$ ,  $p\leq 0.001$  and  $p\leq 0.0001$  for *post-hoc* genotype comparisons, respectively.

418

### 419 **3.2 Neuroendocrine response in $C3aR^{-/-}$ and $C3^{-/-}$ mice following exposure to the** 420 **elevated plus maze**

421 We next tested whether the behavioural measures of anxiety were paralleled by  
422 changes in plasma levels of the stress hormone corticosterone. In a separate cohort  
423 of wildtype,  $C3^{-/-}$  and  $C3aR^{-/-}$  male mice, we assayed plasma corticosterone 30 minutes  
424 after exposure to the EPM and compared levels to those of a group of animals who  
425 remained in their home-cages. There were no genotype differences in basal  
426 corticosterone levels; however, being placed on the EPM increased plasma  
427 corticosterone 6-15-fold in all genotypes, demonstrating that the EPM was a potent  
428 stressor (Figure 2A). *Post hoc* analyses showed a significantly greater EPM-evoked  
429 corticosterone response in the  $C3aR^{-/-}$  animals, consistent with their increased  
430 anxiety-like behaviour observed on the maze.

431

432

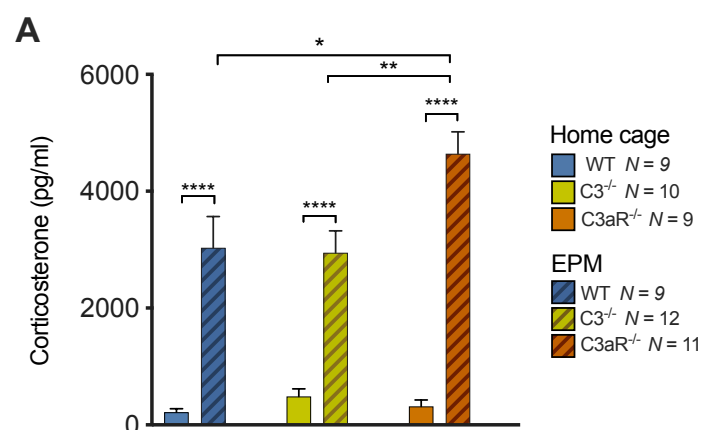

433

434 **Figure 2. Neuroendocrine response following exposure to the elevated plus**  
435 **maze (A)** 5-minute exposure to the EPM significantly elevated corticosterone in all  
436 genotypes (main effect of CONDITION,  $F_{1,54}=143$ ,  $p<0.0001$ ; baseline  $344.66\pm63.70$   
437 vs. EPM  $3553.84\pm274.13$ ). There was a significant GENOTYPE  $\times$  CONDITION  
438 interaction ( $F_{2,54}=4.64$ ,  $p=0.0138$ ). *Post hoc* analysis showed that after the EPM,  
439  $C3aR^{-/-}$  mice demonstrated significantly higher corticosterone levels ( $4640.27\pm376.13$ )  
440 than wildtype ( $3033.78\pm535.06$ ,  $p=0.0127$ ) and  $C3^{-/-}$  mice ( $2948.00\pm374.87$ ,  
441  $p=0.0032$ ). *Post hoc* tests also indicated that there were no baseline differences  
442 between genotypes (wildtype  $216.54\pm63.2$  vs.  $C3aR^{-/-}$   $316.17\pm111.60$   $p>0.9999$ ,  
443 wildtype vs.  $C3^{-/-}$   $p=0.9927$ , and  $C3^{-/-}$   $485.60\pm130.35$  vs.  $C3aR^{-/-}$  mice  $p=0.9992$ ). Data  
444 represent mean + S.E.M. \*, \*\*, and \*\*\*\* represent  $p\leq0.05$ ,  $p\leq0.01$  and  $p\leq0.0001$  for  
445 *post-hoc* genotype comparisons, respectively.

446

447

### 448 **3.3 Altered sensitivity of $C3aR^{-/-}$ and $C3^{-/-}$ mice to diazepam in the elevated plus** 449 **maze**

450 In a further independent cohort of male mice, we tested the sensitivity of EPM induced  
451 anxiety-like behaviour to the benzodiazepine diazepam, an established clinically  
452 effective anxiolytic drug<sup>47,52</sup>. Our initial behavioural findings were replicated in vehicle-  
453 treated animals across all behavioural indices of anxiety, again showing an anxiogenic  
454 phenotype in  $C3aR^{-/-}$  but not  $C3^{-/-}$  mice (Figure 3A). As anticipated, in wildtype mice  
455 2mg/kg diazepam led to a trend for increased time on the open arms (Figure 3B) and  
456 a significant reduction in SAPs which are considered to reflect risk assessment  
457 behaviour<sup>53-55</sup>(Figure 3C). These effects were therefore consistent with reduced  
458 anxiety<sup>50,55</sup>. In contrast, the same dose of drug that was effective in eliciting anxiolysis

459 in wildtypes was without effects in *C3aR*<sup>-/-</sup> mice (Figure 3A,B,C) and produced a  
 460 seemingly anxiogenic (increased anxiety) pattern of effects in *C3*<sup>-/-</sup> mice (Figure 3A,B  
 461 and Figure S4B,C). Locomotor activity monitored across all the maze (Figure S4D)  
 462 indicated that wildtype and *C3aR*<sup>-/-</sup> mice were unlikely to have been influenced by  
 463 diazepam-induced sedation. In *C3*<sup>-/-</sup> mice however, activity was significantly  
 464 suppressed under drug conditions indicating a possible sedative effect. Together,  
 465 these data indicated a fundamentally altered reactivity to diazepam in both *C3*<sup>-/-</sup> and  
 466 *C3aR*<sup>-/-</sup> models.

467

468

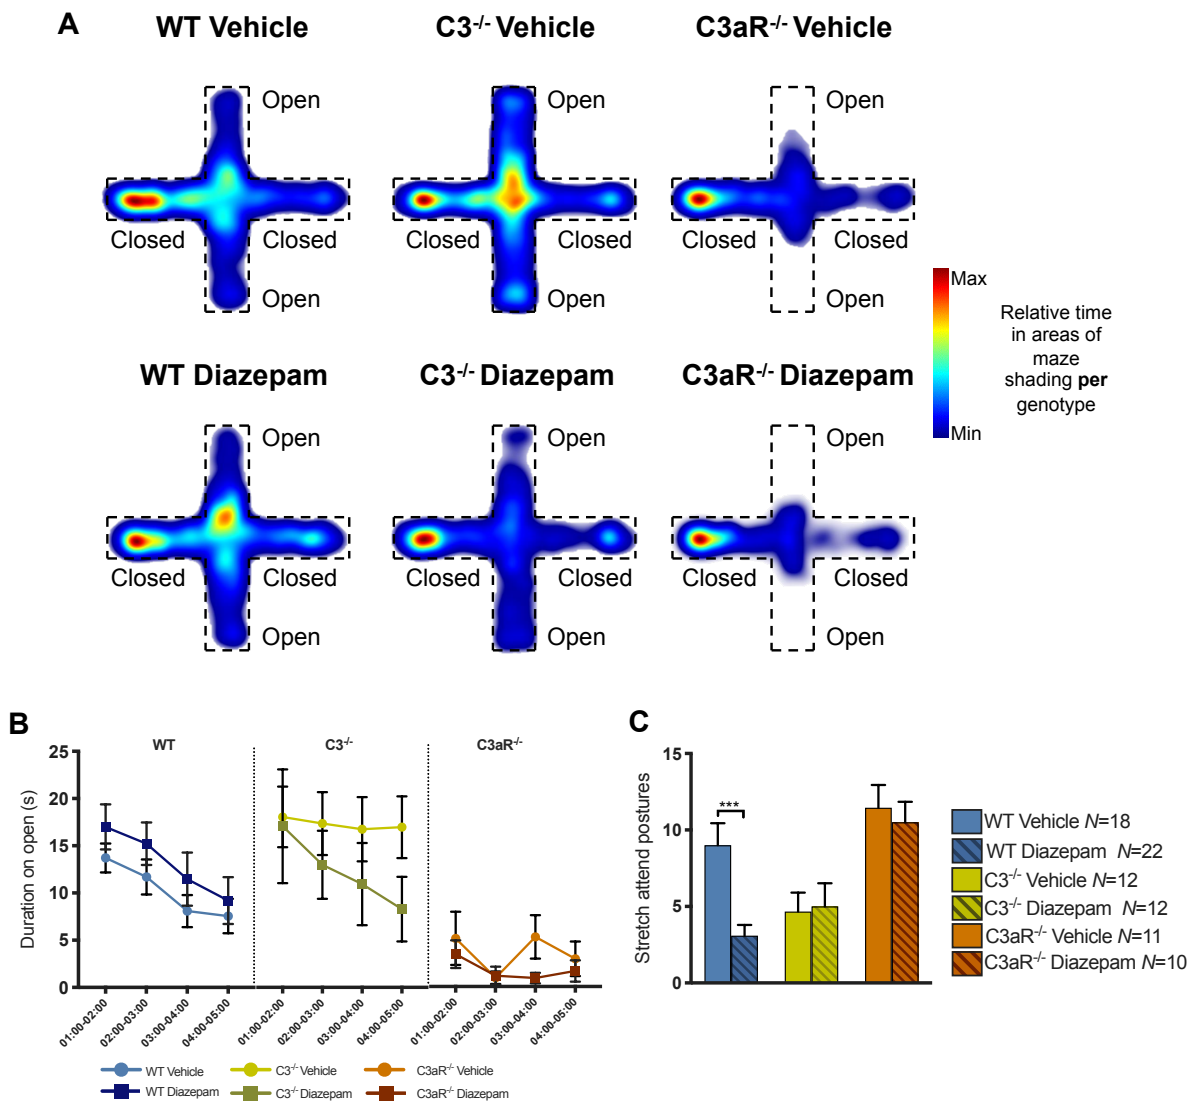

469

470 **Figure 3. Altered sensitivity to diazepam in  $C3aR^{-/-}$  and  $C3^{-/-}$  mice.** Behaviourally  
471 naïve mice were treated with either diazepam (2mg/kg, i.p) or vehicle injections once  
472 daily for 2 days and then 30 minutes prior to testing. **(A)** Heatmaps demonstrating  
473 duration spent in zones of the maze by vehicle treated and diazepam treated animals  
474 **(B)** Plots showing duration spent on open arms in 1-minute time bins (start-01:00 was  
475 excluded due to effect of diazepam in delaying initial entry to open arms across  
476 genotypes, see Supplementary Figure 4A). There was a trend for wildtype diazepam  
477 treated animals to spend more time on the open arms throughout the task although  
478 this did not reach significance (main effect of DRUG,  $F_{1,38}=1.41$ ,  $p=0.2462$ ). In  $C3^{-/-}$   
479 mice there was a strong tendency for drug treated animals to explore the open arms  
480 less than vehicle treated  $C3^{-/-}$  mice (main effect of DRUG,  $F_{1,22}=1.25$ ,  $p=0.2764$ ). A  
481 similar, though less pronounced pattern was seen in  $C3aR^{-/-}$  mice (main effect of  
482 DRUG,  $F_{1,19}=1.55$ ,  $p=0.2284$ ) **(C)** There were genotype differences in SAPs (main  
483 effect of GENOTYPE,  $F_{2,79}=10.7$ ,  $p<0.0001$ ), a main effect of DRUG ( $F_{1,79}=4.13$ ,  
484  $p=0.0454$ ) and a significant GENOTYPE  $\times$  DRUG interaction ( $F_{2,79}=4.64$ ,  $p=0.0138$ ).  
485 *Post hoc* tests showed that diazepam significantly reduced the number of SAPs in  
486 wildtype mice only (wildtype vehicle  $9.00\pm 1.44$  vs. wildtype diazepam  $3.09\pm 0.71$ ,  
487  $p=0.0006$ ,  $C3^{-/-}$  vehicle  $4.67\pm 1.24$  vs.  $C3^{-/-}$  diazepam  $5.00\pm 1.51$ ,  $p=0.9975$ ,  $C3aR^{-/-}$   
488 vehicle  $11.45\pm 1.49$  vs.  $C3aR^{-/-}$  diazepam  $10.50\pm 1.34$ ,  $p=0.9558$ ). Data are mean +  
489 S.E.M. \*, \*\*, and \*\*\* represent  $p\leq 0.05$ ,  $p\leq 0.01$  and  $p\leq 0.001$  for *post-hoc* genotype  
490 comparisons, respectively.

491  
492

493

494

### 495 **3.4 Enhanced fear learning in $C3^{-/-}$ but not $C3aR^{-/-}$ mice**

496 Psychiatric disorders are associated with maladaptive responses to both innate and  
497 learned aversive stimuli<sup>56,57</sup>. We therefore extended our analysis to investigate  
498 whether the behavioural dissociations in innate anxiety observed between  $C3^{-/-}$  and  
499  $C3aR^{-/-}$  mice would also apply to learned or conditioned fear, where a previously  
500 neutral cue generates a fear response as a result of predicting an aversive outcome.  
501 In a further group of male mice, we used the fear-potentiated startle (FPS)  
502 paradigm<sup>30,58</sup> a well-established method of generating learned fear responses to an  
503 acute and imminent danger signal that is characteristic of fear. In this paradigm (see  
504 Figure 4A and Methods Section 2.7) fear learning is indexed by an enhanced response  
505 to a startling noise in the presence of a cue (the conditioned stimulus or CS) previously  
506 paired with mild foot shock (the unconditioned stimulus). In the pre-conditioning  
507 session, pulse-alone trials revealed increased basal startle reactivity in both  $C3aR^{-/-}$   
508 and  $C3^{-/-}$  mice relative to wildtype (Figure 4B). Increased reactivity to the unconditioned  
509 foot shock stimulus (in the absence of any startle stimulus) during the conditioning  
510 session was also observed in both knockouts (Figure 4C). However, these common  
511 effects of genotype were not seen in the fear-potentiated startle measures which index  
512 fear learning. Whilst all groups showed the expected enhancement of the startle  
513 response in the presence of the CS, the effect of the CS was significantly greater in  
514  $C3^{-/-}$  animals relative to the  $C3aR^{-/-}$  and wildtype mice (Figure 4D), indicating enhanced  
515 learning of the fear related-cue by the  $C3^{-/-}$  mice. This pattern of effects was also  
516 observed in female mice (Figure S8). This was the opposite pattern of effects to those  
517 observed in the tests of innate anxiety and showed a double dissociation in the impact  
518 of manipulating C3 and C3aR function that depended fundamentally on the nature of  
519 the aversive stimulus.

520

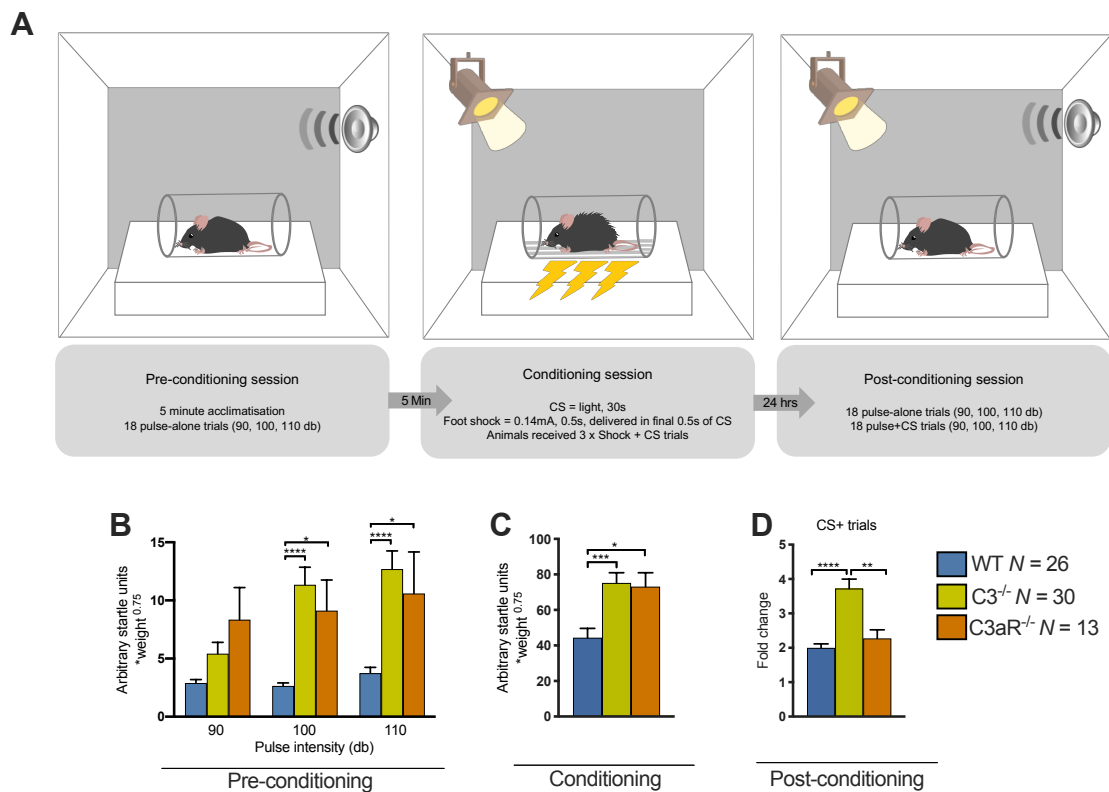

521

522 **Figure 4. Enhanced fear-potentiated startle in C3<sup>-/-</sup> but not C3aR<sup>-/-</sup> mice. (A)**

523 chart depicting the FPS protocol used, which took place in three separate sessions

524 over two consecutive days. Baseline startle reactivity to a range of pulse intensities

525 was assessed in the pre-conditioning session, immediately preceding the conditioning

526 session in which a visual stimulus (light) was paired with 3 weak foot shocks. 24 hours

527 later, subjects were re-introduced to the same chamber and startle reactivity was

528 compared between pulse-alone trials and pulse+CS trials to determine the degree of

529 FPS. On all trials, the peak startle response was recorded and normalised for body

530 weight differences using Kleiber's 0.75 mass exponent, and fold-changes calculated.

531 **(B)** There was a significant main effect of GENOTYPE ( $F_{2,66}=9.04$ ,  $p=0.0003$ ) and a532 significant GENOTYPE  $\times$  STIMULUS INTENSITY interaction ( $F_{4,132}=7.55$ ,  $p<0.0001$ ).533 C3<sup>-/-</sup> and C3aR<sup>-/-</sup> mice demonstrated increased levels of startle responding relative to534 wildtype mice at 100dB (C3<sup>-/-</sup> 11.34 $\pm$ 1.51 vs. wildtype 2.63 $\pm$ 0.26,  $p<0.0001$ , C3aR<sup>-/-</sup>

535 9.12±2.63 vs. wildtype p=0.0174) and 110dB ( $C3^{-/-}$  12.69±1.55 vs. wildtype 3.74±0.50,  
536 p<0.0001,  $C3aR^{-/-}$  10.58±3.58 vs. wildtype p=0.0111) **(C)**  $C3^{-/-}$  and  $C3aR^{-/-}$  mice also  
537 showed increased startle responding to the footshock+CS ( $C3^{-/-}$  75.18±5.73,  $C3aR^{-/-}$   
538 73.14±7.78) pairings relative to wildtype mice (44.34±5.29,  $C3^{-/-}$  vs. wildtype p=0.0006,  
539  $C3aR^{-/-}$  vs. wildtype p=0.0137, overall ANOVA  $F_{2,66}=8.7$ , p=0.0004), although it should  
540 be noted that responses were much greater to these stimuli in all mice than to the  
541 startle stimuli in the pre-conditioning session. **(D)** In the post-conditioning session, all  
542 mice demonstrated increases to the pulse+CS stimuli in comparison to pulse-alone  
543 stimuli, as demonstrated by the fold-change increase in startle responding, however,  
544 this effect was significantly increased in  $C3^{-/-}$  mice (3.72±0.27) relative to wildtype  
545 (1.99±0.11, p<0.0001) and  $C3aR^{-/-}$  mice (2.27±0.24, p=0.0056, overall Kruskal-Wallis  
546 test  $H_2=27.7$ , p<0.0001). Data are mean + S.E.M. \*, \*\*, \*\*\* and \*\*\*\* represent p≤0.05,  
547 p≤0.01, p≤0.001 and p≤0.0001 for *post-hoc* genotype comparisons, respectively.

548  
549  
550

### 551 **3.5 Complement signalling pathways underlying abnormal learned fear** 552 **phenotypes in $C3^{-/-}$ mice**

553 Given the central role of C3 within the complement system, its deletion affects a  
554 number of distal pathways (Figure 5A), with the activity of the C3a/C3aR, C3b/CR3,  
555 C5a/C5aR and terminal pathways affected. Therefore, the loss of function of any of  
556 these pathways may have contributed to the observed fear learning phenotype in  $C3^{-/-}$   
557 mice. However, it is possible to exclude effects due to loss of the C3a/C3aR pathway  
558 since the fear learning phenotype was specific to  $C3^{-/-}$  and not  $C3aR^{-/-}$  mice (Figure  
559 4D). This left iC3b/CR3 signalling and/or pathways downstream of C5 (i.e. C5a/C5aR,  
560 terminal pathway) as the remaining possibilities. In order to distinguish between these



561 pathways, we repeated the FPS experiment with the addition of  $C5^{-/-}$  mice. This model  
562 has intact  $C3a/C3aR$  and  $iC3b/CR3$  signalling, but lacks  $C5a/C5b$  and terminal  
563 pathway activity, as do  $C3^{-/-}$  mice (Figure 5A). We hypothesised that if  $C5^{-/-}$  mice also  
564 displayed enhanced fear-potentiated startle, then the phenotype in  $C3^{-/-}$  mice would  
565 likely be due to a loss of  $C5a/C5aR$  signalling or the terminal pathway. On the other  
566 hand, if  $C5^{-/-}$  mice demonstrated normal fear-potentiated startle, this would confine the  
567 likely mediating pathway in  $C3^{-/-}$  mice to  $iC3b/CR3$  signaling (Figure 5A).

568

569 Results from the pre-conditioning session demonstrated increases in the startle  
570 response of  $C5^{-/-}$  mice, (Figure 5B) although in this instance the previously observed  
571 enhanced startle reactivity in  $C3^{-/-}$  mice (Figure 4B) was not replicated. In the  
572 conditioning session, there was again evidence of increased startle responses to  
573 shock (Figure 5C) in  $C3^{-/-}$  mice and responses were of a similar magnitude in  $C5^{-/-}$   
574 mice, although these were not significantly different to wildtype. We replicated the  
575 previous finding of enhanced fear-potentiated startle in  $C3^{-/-}$  mice (Figure 5D), but  
576 critically both male (Figure 5) and female (Figure S9)  $C5^{-/-}$  mice showed no evidence  
577 of enhanced fear learning and were comparable to wildtypes, indicating that loss of  
578  $iC3b/CR3$  signalling, but not loss of  $C5a/C5aR$  and the terminal pathway, was involved  
579 in the  $C3^{-/-}$  fear learning phenotype. Additionally, we did not observe innate anxiety-  
580 like phenotypes in  $C5^{-/-}$  male mice (Figure S5).

581

582 This pattern of effects allowed us to distinguish between the likely mechanisms  
583 underlying the enhanced learned fear in  $C3^{-/-}$  mice, as we could exclude concomitant  
584 loss of  $C5a/C5aR$  signalling or molecules downstream of  $C5$ , and hence also exclude  
585 an explanation based on effects of  $C5a/C5aR$  signalling on developmental

586 neurogenesis<sup>59,60</sup>. Instead, these data raised the possibility of an explanation based  
 587 on the established effects of the iC3b/CR3 pathway on synaptic pruning, a mechanism  
 588 involving microglia mediated elimination of synapses impacting on neurodevelopment  
 589 and learning-related synaptic plasticity<sup>13,14,61</sup>.  
 590

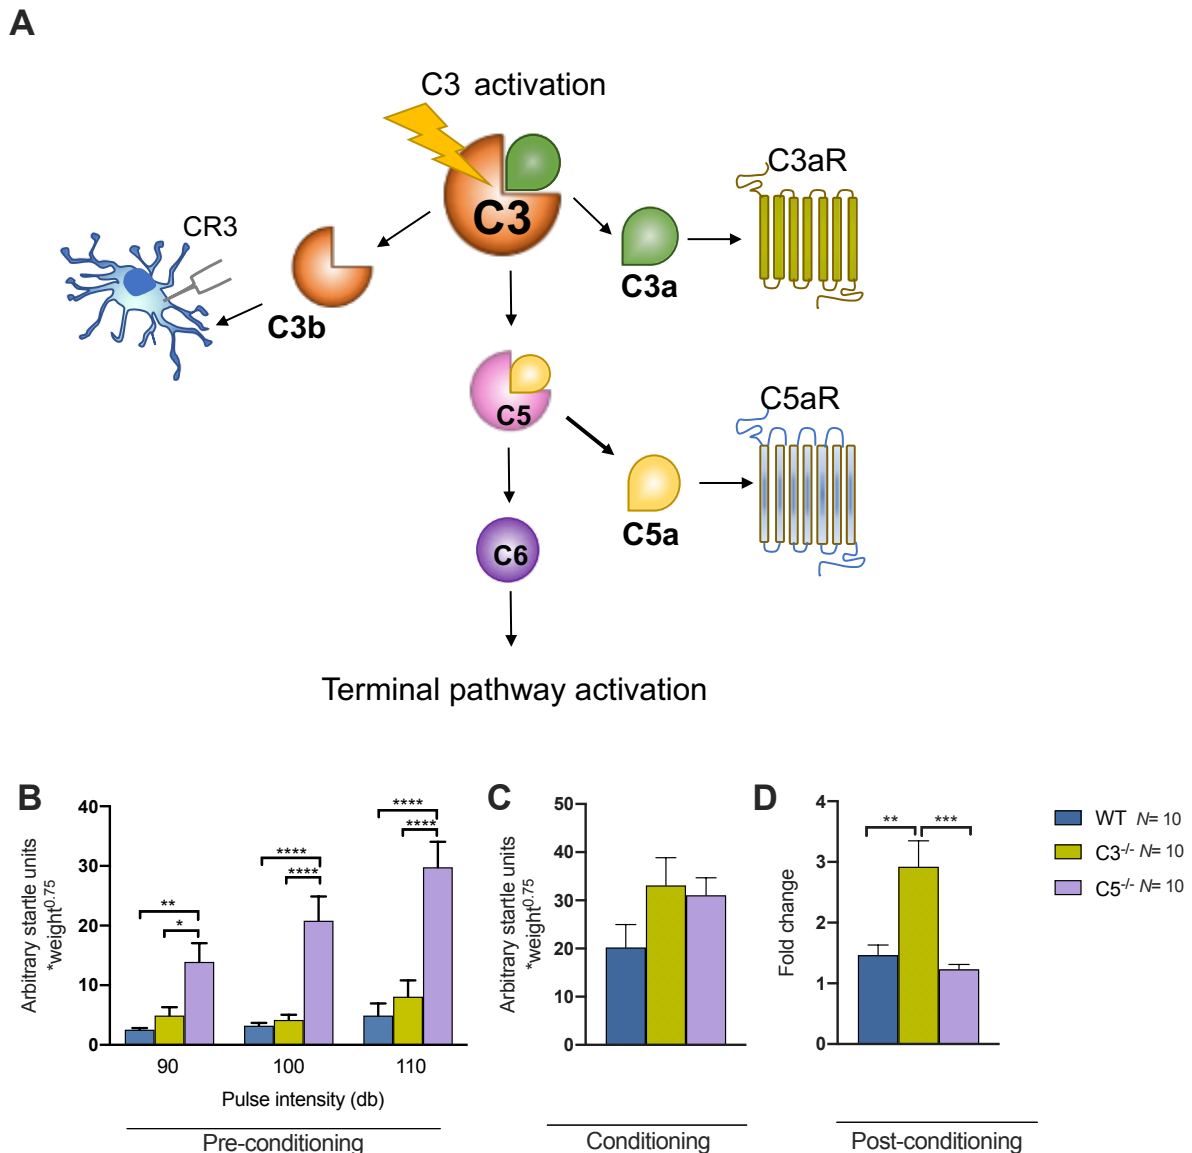

591

592 **Figure 5. Pathways underlying fear learning phenotypes in C3<sup>-/-</sup> mice (A)** C3  
 593 activation leads to generation of cleavage fragments C3a and C3b. The former signals  
 594 via C3aR whereas the latter signals via complement receptor 3 (CR3). C3b is also  
 595 necessary for forming the convertase enzyme that cleaves C5. Upon cleavage, C5

596 generates the fragments C5a and C5b (not shown). C5a signals via the C5aR,  
597 whereas C5b propagates activity of the terminal complement pathway via C6. Since  
598 C3 cannot be activated in  $C3^{-/-}$  mice, the action of all these pathways (C3a/C3aR,  
599 C3b/CR3, C5a/C5aR, terminal pathway) is absent. By using  $C5^{-/-}$  mice, which lack  
600 C5a/C5aR and terminal pathway activity, we examined whether lack of C3b/CR3,  
601 C5a/C5aR or the terminal pathway was responsible for fear learning phenotypes in  
602  $C3^{-/-}$  mice. **(B)** In the pre-conditioning session there were significant main effects of  
603 GENOTYPE ( $F_{2,27}=18.4$ ,  $p<0.0001$ ) and STIMULUS INTENSITY ( $F_{2,54}=19.0$ ,  
604  $p<0.0001$ ) and a significant GENOTYPE  $\times$  STIMULUS INTENSITY interaction  
605 ( $F_{4,54}=7.00$ ,  $p<0.0001$ ).  $C5^{-/-}$  mice demonstrated increased levels of startle responding  
606 relative to wildtype and  $C3^{-/-}$  mice at all stimulus intensities (90dB; WT  $2.55\pm 0.26$  vs.  
607  $C5^{-/-}$   $13.92\pm 3.14$ ,  $p=0.0069$ ,  $C3^{-/-}$   $4.92\pm 1.40$  vs.  $C5^{-/-}$   $p=0.0405$ , WT vs.  $C3^{-/-}$   $p=0.7919$ ;  
608 100dB; WT  $3.23\pm 0.45$  vs.  $C5^{-/-}$   $20.83\pm 4.07$ ,  $p<0.0001$ ,  $C3^{-/-}$   $4.924.17\pm 0.88$  vs.  $C5^{-/-}$   
609  $p<0.0001$ , WT vs.  $C3^{-/-}$   $p=0.9639$ ; 110dB; WT  $4.92\pm 2.03$  vs.  $C5^{-/-}$   $29.78\pm 4.29$ ,  
610  $p<0.0001$ ,  $C3^{-/-}$   $8.07\pm 2.76$  vs.  $C5^{-/-}$   $p<0.0001$ , WT vs.  $C3^{-/-}$   $p=0.6643$ ). **(C)** There were  
611 no significant differences in startle responses to the footshock+CS pairings during the  
612 conditioning session (WT  $20.23\pm 4.76$ ,  $C3^{-/-}$   $33.10\pm 5.74$ ,  $C5^{-/-}$   $31.08\pm 3.59$ ,  $F_{2,27}=2.10$ ,  
613  $p=0.1421$ ). **(D)** In the post-conditioning session, all mice demonstrated increases to  
614 the pulse+CS stimuli in comparison to pulse-alone stimuli, as demonstrated by the  
615 fold-change increase in startle responding, however, this effect was again significantly  
616 increased only in  $C3^{-/-}$  mice ( $2.92\pm 0.43$ ) relative to wildtype ( $1.47\pm 0.17$ ,  $p=0.0020$ ) and  
617  $C5^{-/-}$  mice ( $1.23\pm 0.08$ ,  $p=0.0004$ , overall ANOVA  $F_{2,27}=11.5$ ,  $p=0.0002$ ). Data  
618 represent mean + S.E.M. \*, \*\*, \*\*\* and \*\*\*\* represent  $p\leq 0.05$ ,  $p\leq 0.01$ ,  $p\leq 0.001$  and  
619  $p\leq 0.0001$  for *post-hoc* genotype comparisons, respectively.

620

621

### 622 **3.6 Differential expression of stress and anxiety related genes in *C3aR*<sup>-/-</sup> and** 623 ***C3*<sup>-/-</sup> mice**

624 We next sought to assess whether the dissociations in innate anxiety and learned fear  
625 between *C3aR*<sup>-/-</sup> and *C3*<sup>-/-</sup> models were associated with differential gene expression in  
626 brain regions associated with emotional behaviours. We assayed gene expression in  
627 male mice, within three regions of recognised importance in stress and anxiety; the  
628 medial prefrontal cortex (mPFC), ventral hippocampus (vHPC) and  
629 cerebellum<sup>28,62</sup>(Figure 6A). Given our previous data showing differential corticosterone  
630 responses and altered sensitivity to diazepam in both knockouts, we first measured  
631 expression of the glucocorticoid receptor *Nr3c1* and the corticotrophin-releasing  
632 hormone receptor 1 *Crhr1*, together with *Gabra2* which encodes the GABA<sub>A</sub> receptor  
633  $\alpha$ 2 subunit responsible for mediating benzodiazepine anxiolysis<sup>63</sup>. There were no  
634 effects of genotype on *Crhr1* and *Gabra2* mRNA expression in any of the brain regions  
635 assayed (Figure 6B,C). *Nr3c1* expression did however show effects of genotype with  
636 trends indicating increases in *C3aR*<sup>-/-</sup> mice in the mPFC and vHPC, and significantly  
637 increased expression in cerebellum that was common to both knockouts (Figure 6D).

638

639 As activation of C3aR has been shown to stimulate calcium influx from the extracellular  
640 space<sup>2-4,64,65</sup> and calcium channel subunit variants have strong links to risk for  
641 psychiatric and neurological disorders, as well as anxiety phenotypes<sup>66,67</sup>, we also  
642 investigated a panel of voltage-gated calcium channels. Expression of *Cacna1d*, which  
643 encodes the Cav1.3 channel of L-type calcium gated voltage channels, was increased  
644 in the mPFC of *C3aR*<sup>-/-</sup> mice (Figure 6E) and in both *C3*<sup>-/-</sup> and *C3aR*<sup>-/-</sup> mice there was  
645 upregulation of cerebellar *Cacna1e*, which encodes the Cav2.3 channel of R-type  
646 voltage gated calcium channels (Figure 6F). We also investigated the expression of

647 *Cacna1c* which encodes the Ca<sub>v</sub>1.2 subunit of L-type voltage gated calcium channels  
 648 that forms the channel pore allowing calcium entry<sup>68</sup>. We found genotype and brain  
 649 region specific changes in *Cacna1c* expression, with selective increases in expression  
 650 in *C3aR*<sup>-/-</sup> mice in the vHPC and cerebellum, but not the mPFC (Figure 6G).  
 651

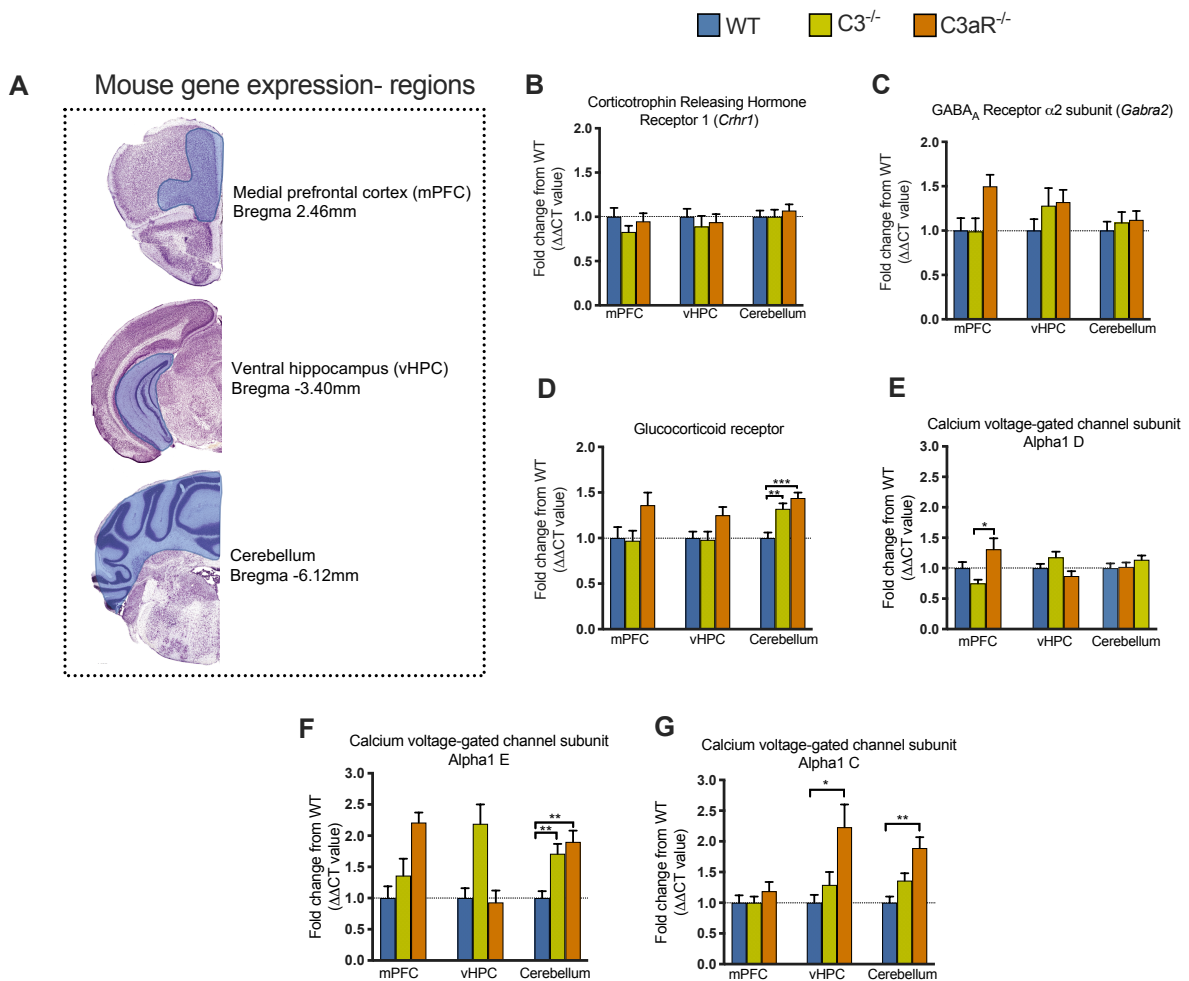

652

653 **Figure 6. mRNA expression of stress and anxiety related genes. (A)** Animals were

654 culled and the medial prefrontal cortex (mPFC), ventral hippocampus (vHPC) and

655 cerebellum were dissected. **(B)** There were no significant differences in the expression

656 of Corticotrophin releasing hormone receptor 1 (*Crhr1*) in any region, across

657 genotypes (mPFC  $F_{2,53}=0.587$ ,  $p=0.5597$ , N wildtype=20, *C3*<sup>-/-</sup>=17, *C3aR*<sup>-/-</sup>= 19; vHPC

658  $F_{2,49}=0.169$ ,  $p=0.8450$ , N WT=20, *C3*<sup>-/-</sup>=15, *C3aR*<sup>-/-</sup>= 17; cerebellum  $F_{2,47}=0.0482$ ,

659  $p=0.8346$ , N WT=19,  $C3^{-/-}$ =17,  $C3aR^{-/-}$ = 14). **(C)** There were also no significant  
660 changes in the expression of the GABA<sub>A</sub> receptor  $\alpha 2$  subunit (*Gabra2*) in any region,  
661 across genotypes (mPFC  $H_2=1.04$ ,  $p=0.5939$ , N wildtype=20,  $C3^{-/-}$ =19,  $C3aR^{-/-}$ = 16;  
662 vHPC  $F_{2,49}=0.721$ ,  $p=0.4914$ , N WT=20,  $C3^{-/-}$ =13,  $C3aR^{-/-}$ = 19; cerebellum  
663  $F_{2,47}=0.221$ ,  $p=0.8026$ , N WT=18,  $C3^{-/-}$ =17,  $C3aR^{-/-}$ = 15). **(D)** Expression of the  
664 glucocorticoid receptor (*Nr3c1*) was significantly increased in the cerebellum of both  
665  $C3^{-/-}$  and  $C3aR^{-/-}$  groups ( $F_{2,61}=10.3$ ,  $p=0.0002$ ,  $C3^{-/-}$  vs. wildtype  $p=0.0023$ ,  $C3aR^{-/-}$  vs.  
666 wildtype  $p=0.0002$ , N wildtype=19,  $C3^{-/-}$ =20,  $C3aR^{-/-}$ = 15). There were trends towards  
667 increased expression of the glucocorticoid receptor gene *Nr3c1* in the mPFC and  
668 vHPC of  $C3aR^{-/-}$  mice but these were not significant (mPFC;  $F_{2,56}=1.33$ ,  $p=0.2723$ , N  
669 wildtype=20,  $C3^{-/-}$ =20,  $C3aR^{-/-}$ = 19, vHPC;  $F_{2,62}=1.11$ ,  $p=0.3345$ , N wildtype=23,  $C3^{-/-}$   
670 =20,  $C3aR^{-/-}$ = 22). **(E)** Calcium voltage-gated channel subunit Alpha 1d (*Cacna1d*)  
671 expression was changed in the mPFC ( $F_{2,36}=7.52$ ,  $p=0.0407$ ) owing to altered  
672 expression between  $C3^{-/-}$  and  $C3aR^{-/-}$  mice ( $p=0.0314$ ; N wildtype=11,  $C3^{-/-}$ =13,  $C3aR^{-/-}$   
673 =15). There were no differences in the vHPC ( $F_{2,31}=2.27$ ,  $p=0.1199$ , N wildtype=14,  
674  $C3^{-/-}$ =10,  $C3aR^{-/-}$ = 10) or cerebellum ( $F_{1,39}=0.648$ ,  $p=0.5286$ , N wildtype=14,  $C3^{-/-}$ =16,  
675  $C3aR^{-/-}$ = 12). **(F)** Expression of the Calcium voltage-gated channel subunit Alpha 1e  
676 (*Cacna1e*) was significantly upregulated in the cerebellum of both knockouts  
677 ( $F_{2,39}=7.52$ ,  $p=0.0017$ , wildtype vs.  $C3^{-/-}$   $p=0.0082$ , wildtype vs.  $C3aR^{-/-}$   $p=0.0032$ ; N  
678 wildtype=14,  $C3^{-/-}$ =16,  $C3aR^{-/-}$ = 12). There were borderline significant changes in  
679 expression in the vHPC ( $F_{2,32}=3.15$ ,  $p=0.0565$ , N wildtype=14,  $C3^{-/-}$ =11,  $C3aR^{-/-}$ = 10)  
680 and no significant changes in the mPFC ( $H_2=3.43$ ,  $p=0.1802$ , N wildtype=11,  $C3^{-/-}$ =12,  
681  $C3aR^{-/-}$ = 15). **(G)** Expression levels of the Calcium voltage-gated channel subunit  
682 Alpha 1c (*Cacna1c*) were significantly increased in  $C3aR^{-/-}$  mice in a regionally specific  
683 manner in the vHPC ( $F_{2,47}=3.20$ ,  $p=0.0496$ ,  $C3^{-/-}$  vs. wildtype  $p=0.6895$ ,  $C3aR^{-/-}$  vs.

684 wildtype  $p=0.0295$ , N wildtype=21,  $C3^{-/-}$ =13,  $C3aR^{-/-}$ = 16) and the cerebellum  
685 ( $F_{2,54}=5.84$ ,  $p=0.0051$ ,  $C3^{-/-}$  vs. wildtype  $p=0.1613$ ,  $C3aR^{-/-}$  vs. wildtype  $p=0.0024$ , N  
686 wildtype=20,  $C3^{-/-}$ =20,  $C3aR^{-/-}$ = 17). There were no significant changes in the mPFC  
687 ( $F_{2,52}=1.04$ ,  $p=0.5939$ , N wildtype=20,  $C3^{-/-}$ =19,  $C3aR^{-/-}$ = 16). Data represent fold  
688 change from wildtype + SEM. \*, \*\*, \*\*\* represent  $p\leq 0.05$ ,  $p\leq 0.01$  and  $p\leq 0.001$  for *post-*  
689 *hoc* genotype comparisons, respectively.

690

691

#### 692 4. Discussion

693 We have used knockout models manipulating specific complement proteins to reveal  
694 dissociable effects of complement pathways on distinct elements of aversive  
695 behaviours. A main finding was a profound innate anxiety phenotype in the  $C3aR^{-/-}$   
696 mice that was absent in  $C3^{-/-}$  mice. The specificity of the anxiety phenotype exhibited  
697 by  $C3aR^{-/-}$  mice at the behavioural level was paralleled by EPM-evoked corticosterone  
698 levels, confirming the validity of the EPM as an index of anxiety-like behaviour. A  
699 second main finding was a double dissociation in terms of fear learning, whereby  $C3^{-/-}$   
700  $^{-/-}$  and not  $C3aR^{-/-}$  mice displayed enhanced conditioned fear reactivity. Using  $C5^{-/-}$   
701 mice, we conclude that the mechanisms accounting for the fear learning phenotype in  
702  $C3^{-/-}$  mice are likely to arise from lack of iC3b/CR3 pathway activity. These data  
703 indicate distinct effects mediated by closely related elements of the complement  
704 system that differentially impact upon the neural mechanisms underlying innate  
705 anxiety and learned fear.

706

707 Our findings extend previous findings of abnormal anxiety behaviour in  $C3aR^{-/-}$  mice<sup>35</sup>

708 . Our use of specific complement knockout models allowed us to further pinpoint the

709 likely complement pathways and potential mechanisms underlying C3aR-mediated  
710 anxiety. Since C3a is solely produced via C3 cleavage, and C3aR is the canonical  
711 receptor for C3a, we expected that any phenotypes dependent on the binding of C3a  
712 to the C3aR would be apparent in both *C3*<sup>-/-</sup> and *C3aR*<sup>-/-</sup> models. However, this was  
713 not borne out in our data. Given the divergence in phenotypes seen, one explanation  
714 is that the *C3aR*<sup>-/-</sup> anxiety phenotypes are independent of C3a and instead mediated  
715 by an alternative ligand. It has long been speculated that there may be promiscuity of  
716 the C3aR due to its unusually large second extracellular loop<sup>69</sup>. Indeed, a cleavage  
717 fragment of the neuropeptide precursor protein VGF (non-acronymic), TLQP-21, was  
718 recently reported to bind the C3aR<sup>70,71</sup>. This peptide has pleiotropic roles including in  
719 the stress response<sup>72</sup> and its precursor VGF is widely expressed throughout the CNS<sup>73</sup>  
720 and in regions associated with stress reactivity such as the hypothalamus, where there  
721 is evidence for C3aR expression<sup>74,75</sup>. Determining whether the mechanisms  
722 underlying innate anxiety phenotypes in *C3aR*<sup>-/-</sup> mice are dependent on TLQP-  
723 21/C3aR interactions will be a priority for future work.

724

725 Whether the *C3aR*<sup>-/-</sup> phenotypes described here are the result of ongoing effects of  
726 *C3aR* deletion in the adult brain or instead the enduring consequence of  
727 neurodevelopmental impacts of *C3aR* deficiency also remains to be determined. On  
728 the basis of previous findings implicating C3aR in both developmental neurogenesis<sup>76</sup>  
729 and in acute brain changes following behavioural manipulations<sup>77</sup>, both are  
730 possibilities. One strategy would be to test whether acute administration of the C3aR  
731 antagonist SB290157<sup>78</sup> phenocopies the constitutive knockout of *C3aR*, though at  
732 present no data is available on the CNS penetration of SB290157 and this molecule  
733 has received criticism due to evidence of agonist activity<sup>79</sup>.



734

735 We also probed mechanisms underpinning the *C3aR*<sup>-/-</sup> innate anxiety phenotype by  
736 assessing the effects of the anxiolytic drug diazepam. We found that a dose of  
737 diazepam that was anxiolytic in wildtype mice had no effect in *C3aR*<sup>-/-</sup> mice. Stretch  
738 attend postures, thought to reflect risk assessment behaviour<sup>54</sup>, are highly sensitive to  
739 pharmacological manipulation<sup>50,80</sup> and in agreement with our own findings, diazepam  
740 has been shown to specifically decrease SAPs in the absence of effects on open arm  
741 exploration<sup>81</sup>. Importantly, *C3aR*<sup>-/-</sup> mice consistently performed more SAPs than other  
742 genotypes, and therefore floor effects cannot account for the pattern of results  
743 observed. Benzodiazepines act on GABA<sub>A</sub> receptors<sup>63</sup> however we found no  
744 significant changes in expression of *Gabra2*, a GABA<sub>A</sub> receptor subunit responsible  
745 for anxiolytic actions of benzodiazepines in tests of innate anxiety<sup>63</sup>, in the brain  
746 regions sampled. This raises the possibility of alternative molecular mechanisms  
747 mediating the anxiety phenotypes seen in the *C3aR*<sup>-/-</sup> model. Whatever the molecular  
748 underpinnings of the dissociable anxiety phenotypes, our data show a profoundly  
749 altered effect of diazepam in both knockouts; a lack of response in *C3aR*<sup>-/-</sup> and an  
750 apparent paradoxical anxiogenic effect of the drug in *C3*<sup>-/-</sup> mice, though this  
751 interpretation needs to take into account an apparent selective sedative effect in *C3*<sup>-/-</sup>  
752 mice.

753

754 In contrast to innate anxiety, we observed a specific effect of C3 knockout on  
755 conditioned fear. The absence of a comparable phenotype in *C3aR*<sup>-/-</sup> and *C5*<sup>-/-</sup> mice  
756 suggested that these effects were unlikely to be due to loss of either C3a/C3aR,  
757 C5a/C5aR, or the terminal pathway, and instead that enhanced fear learning  
758 phenotypes in *C3*<sup>-/-</sup> mice were likely dependent on loss of the iC3b/CR3 pathway. This

759 pathway has been strongly implicated in activity dependent synaptic elimination during  
760 neurodevelopment<sup>13,25</sup> and in age-dependent synapse loss<sup>82</sup>. While demonstrations  
761 of complement mediated synaptic pruning during development have centered on the  
762 visual system, complement-mediated microglial phagocytosis of dopamine D1  
763 receptors has been demonstrated in the nucleus accumbens with functional impacts  
764 on social behaviour<sup>83</sup>. It remains to be seen whether complement mediated processes  
765 of this nature, within brain regions linked to fear processing such as the ventral  
766 hippocampus, amygdala and prefrontal cortex are responsible for enhanced fear  
767 learning in *C3*<sup>-/-</sup> mice, or whether this phenotype is a general consequence of altered  
768 synaptic elimination throughout the *C3*<sup>-/-</sup> brain. In addition to developmental processes,  
769 the iC3b/CR3 pathway could also be involved acutely in fear learning. C3 mRNA is  
770 upregulated during discrete stages of fear learning<sup>77</sup> and microglial CR3 is implicated  
771 in long term depression<sup>84</sup>. Furthermore, complement-mediated engulfment of  
772 synapses by microglia may be important in the forgetting of fear memories<sup>14</sup>.

773

774 At the gene expression level, we found some changes which were common to both  
775 knockouts, and one result that was specific to *C3aR*<sup>-/-</sup> mice. Regarding the latter, there  
776 was a highly specific increase in expression of *Cacna1c* in the ventral hippocampus  
777 and cerebellum of *C3aR*<sup>-/-</sup> mice. This finding is of potential interest given the strong  
778 evidence implicating *CACNA1C* variants in genetic risk for a broad spectrum of  
779 psychiatric disorders including schizophrenia and bipolar disorder<sup>66</sup>, with anxiety  
780 phenotypes reported in both human risk variant carriers<sup>85</sup> and animal models<sup>86-89</sup>.  
781 Furthermore, recent evidence indicates convergent polygenic mechanisms shared  
782 between complement and other psychiatric risk genes<sup>90</sup>, including calcium regulation  
783 pathways, and thus our study lends further support to an interaction between these

784 systems. Whether alterations in *Cacna1c* are of direct functional relevance to the  
785 *C3aR<sup>-/-</sup>* anxiety phenotypes observed here remains to be determined experimentally.  
786 We also observed increased cerebellar expression of the glucocorticoid receptor in  
787 both *C3<sup>-/-</sup>* and *C3aR<sup>-/-</sup>* mice, suggesting that these alterations may result from the  
788 absence of C3a/C3aR signalling. Expression of these genes did not differentiate  
789 between models and therefore were unlikely to contribute to the dissociable effects of  
790 the knockouts on behaviour and stress hormone physiology. Future studies of  
791 neuronal activity in brain regions linked to emotion may be more informative in terms  
792 of functional neuroanatomy underlying the anxiety-related behavioural and  
793 physiological differences seen in the knockout models.

794

795 Anxiety and fear are commonly comorbid with depression and recent preclinical work  
796 has suggested a protective role for C3a/C3aR in chronic-stress induced depressive-  
797 behaviour<sup>91</sup>. Given the common co-occurrence of anxiety and depression, our findings  
798 of enhanced anxiety in *C3aR<sup>-/-</sup>* mice might seem at odds with the reported resilience  
799 of this strain to depression-related phenotypes<sup>91</sup>. However, the chronic unpredictable-  
800 stress paradigm used in these studies is likely to evoke significant inflammation, and  
801 therefore the extent to which our data in acutely stressed animals can be compared is  
802 questionable. In summary, our findings add significantly to the evidence that  
803 perturbations of the complement system, whether reduced complement activation as  
804 in the present work or excessive activation as is predicted by *C4* genetic variants<sup>24,92</sup>,  
805 have major and dissociable effects on brain and behavioural phenotypes of relevance  
806 to core clinical symptoms of psychiatric disease.

807

808

## 809 **5. Author's contributions**

810 The study was designed by LJW, TH, BPM, WPG and LSW. LJW and TH performed  
811 behavioural experiments with assistance from NH. Molecular analyses were  
812 performed by SAB, EB, MT, ALM, AIB and LJW. Data interpretation were carried out  
813 by JH, MJO, JR, WPG, NH, TRH, BPM, LSW and TH. The manuscript was drafted by  
814 LJW, TH, WPG and LSW. All authors approved the final manuscript.

815

## 816 **6. Acknowledgements**

817 The authors thank Professor Craig Gerard and Professor Marina Botto for provision of  
818 the *C3aR*<sup>-/-</sup> and *C5*<sup>-/-</sup> strains respectively, and to Rhys Perry, Pat Mason, Helen Read  
819 and other staff at Cardiff University BIOSV for their invaluable animal care and  
820 husbandry. This work was supported by a Wellcome Trust Integrative Neuroscience  
821 PhD Studentship awarded to LJW (099816/Z/12/Z), a Waterloo Foundation Early  
822 Career Fellowship awarded to LJW, a Hodge Centre for Neuropsychiatric Immunology  
823 Seed Corn and Project grant awarded to LJW and a Wellcome Trust Strategic Award  
824 100202/Z/12/Z (DEFINE) held by the Neuroscience and Mental Health Research  
825 Institute at Cardiff University.

826

## 827 **7. Competing financial interests**

828 The authors declare no competing financial interests.

829

## 830 **8. Materials and correspondence**

831 All data from this study are available from the corresponding authors upon reasonable  
832 request.

833

834 **9. References**

- 835 1. Coulthard, L. G. & Woodruff, T. M. Is the Complement Activation Product  
836 C3a a Proinflammatory Molecule? Re-evaluating the Evidence and the  
837 Myth. *J. Immunol.* **194**, 3542–3548 (2015).
- 838 2. Norgauer, J. *et al.* Complement fragment C3a stimulates Ca<sup>2+</sup> influx in  
839 neutrophils via a pertussis-toxin-sensitive G protein. *Eur. J. Biochem.*  
840 **217**, 289–294 (1993).
- 841 3. Möller, T., Nolte, C., Burger, R., Verkhratsky, A. & Kettenmann, H.  
842 Mechanisms of C5a and C3a Complement Fragment-Induced [Ca<sup>2+</sup>]<sub>i</sub>  
843 Signaling in Mouse Microglia. *Journal of Neuroscience* **17**, 615–624  
844 (1997).
- 845 4. Lian, H., Li, Y., Lu, H.-C. & Zheng, H. NFκB-Activated Astroglial Release  
846 of Complement C3 Compromises Neuronal Morphology and Function  
847 Associated with Alzheimer's Disease. **85**, 101–115 (2015).
- 848 5. Sayah, S. *et al.* Two different transduction pathways are activated by C3a  
849 and C5a anaphylatoxins on astrocytes. *Molecular Brain Research* **112**,  
850 53–60 (2003).
- 851 6. Morley, B. J. & Walport, M. J. *The Complement FactsBook*. (Academic  
852 Press, 1999).
- 853 7. Kemper, C. & Köhl, J. Back to the future – non-canonical functions of  
854 complement. *Seminars in Immunology* **37**, 1–3 (2018).
- 855 8. Nataf, S., Stahel, P. F., Davoust, N. & Barnum, S. R. Complement  
856 anaphylatoxin receptors on neurons: new tricks for old receptors? *Trends*  
857 *Neurosci.* **22**, 397–402 (1999).
- 858 9. Veerhuis, R., Nielsen, H. M. & Tenner, A. J. Complement in the brain.  
859 *Molecular Immunology* **48**, 1592–1603 (2011).
- 860 10. Bénard, M., Gonzalez, B. J., Biological, M. S. J. O.2004. Characterization  
861 of C3a and C5a receptors in rat cerebellar granule neurons during  
862 maturation neuroprotective effect of C5a against apoptotic cell death. *J*  
863 *Biol. Chem.* **42**, 43487-43496 (2004).
- 864 11. Rahpeymai, Y. *et al.* Complement: a novel factor in basal and ischemia-  
865 induced neurogenesis. *EMBO J* **25**, 1364–1374 (2006).
- 866 12. Gorelik, A. *et al.* Developmental activities of the complement pathway in  
867 migrating neurons. *Nature Communications* **8**, 15096 (2017).
- 868 13. Stevens, B. *et al.* The classical complement cascade mediates CNS  
869 synapse elimination. *Cell* **131**, 1164–1178 (2007).
- 870 14. Wang, C. *et al.* Microglia mediate forgetting via complement-dependent  
871 synaptic elimination. *Science*, **367**, 688-694 (2020).
- 872 15. Harold, D. *et al.* Genome-wide association study identifies variants at  
873 CLU and PICALM associated with Alzheimer's disease. *Nature Genetics*  
874 **41**, 1088–1093 (2009).
- 875 16. Jansen, I. E. *et al.* Genome-wide meta-analysis identifies new loci and  
876 functional pathways influencing Alzheimer's disease risk. *Nature Genetics*  
877 **51**, 404–413 (2019).
- 878 17. Shi, Q. *et al.* Complement C3-Deficient Mice Fail to Display Age-Related  
879 Hippocampal Decline. *Journal of Neuroscience* **35**, 13029–13042 (2015).
- 880 18. Zhou, J., Fonseca, M. I., Pisalyaput, K. & Tenner, A. J. Complement C3  
881 and C4 expression in C1q sufficient and deficient mouse models of  
882 Alzheimer's disease. *Journal of Neurochemistry* **106**, 2080–2092 (2008).

- 883 19. Corbett, B. A. *et al.* A proteomic study of serum from children with autism  
884 showing differential expression of apolipoproteins and complement  
885 proteins. *Mol. Psychiatry* **12**, 292 (2007).
- 886 20. Maes, M., Delange, J., Ranjan, R., Meltzer, H. Y. & Desnyer, R. Acute  
887 phase proteins in schizophrenia, mania and major depression:  
888 modulation by psychotropic drugs. *Pharmacology Biochemistry and*  
889 *Behaviour* 1–11 (1997). doi:10.1016/S0165-1781(96)02915-0
- 890 21. Ruland, T. *et al.* Molecular serum signature of treatment resistant  
891 depression. *Psychopharmacology* 1–9 (2016).
- 892 22. Song, Y. R. *et al.* Specific alterations in plasma proteins during  
893 depressed, manic, and euthymic states of bipolar disorder. *Brazilian*  
894 *Journal of Medical and Biological Research* **48**, 973–982
- 895 23. Oganesyanyan, L. P., Mkrtchyan, G. M., Sukiasyan, S. H. & Boyajyan, A. S.  
896 Classic and alternative complement cascades in post-traumatic stress  
897 disorder. *Bull. Exp. Biol. Med.* **148**, 859–861 (2009).
- 898 24. Sekar, A. *et al.* Schizophrenia risk from complex variation of complement  
899 component 4. *Nature*, **530**, 117–183 (2016).
- 900 25. Schafer, D. P. *et al.* Microglia Sculpt Postnatal Neural Circuits in an  
901 Activity and Complement-Dependent Manner. *Neuron* **74**, 691–705  
902 (2012).
- 903 26. Håvik, B. *et al.* The Complement Control-Related Genes CSMD1 and  
904 CSMD2 Associate to Schizophrenia. *BPS* **70**, 35–42 (2011).
- 905 27. Zhang, S. *et al.* Association Between Polymorphisms of the Complement  
906 3 Gene and Schizophrenia in a Han Chinese Population. *Cell. Physiol.*  
907 *Biochem.* **46**, 2480–2486 (2018).
- 908 28. Tovote, P., Fadok, J. P. & Lüthi, A. Neuronal circuits for fear and anxiety.  
909 *Nat. Rev.* **16**, 317–331 (2015).
- 910 29. Perusini, J. N. & Fanselow, M. S. Neurobehavioral perspectives on the  
911 distinction between fear and anxiety. *Learn. Mem.* **22**, 417–425 (2015).
- 912 30. Davis, M. Neural systems involved in fear and anxiety measured with  
913 fear-potentiated startle. *Am Psychol* **61**, 741–756 (2006).
- 914 31. Engin, E. *et al.* Modulation of anxiety and fear via distinct  
915 intrahippocampal circuits. *eLife*, **5**:e14120, (2016).
- 916 32. Yilmaz, M. *et al.* Overexpression of schizophrenia susceptibility factor  
917 human complement C4A promotes excessive synaptic loss and  
918 behavioral changes in mice. *Nat Neurosci* 1–31 (2020).
- 919 33. Girardi, G. *et al.* Imaging of activated complement using ultrasmall  
920 superparamagnetic iron oxide particles (USPIO)-conjugated vectors: An  
921 in vivo in utero non-invasive method to predict placental insufficiency and  
922 abnormal fetal brain development. *Mol. Psychiatry* **20**, 1017–1026 (2015).
- 923 34. Kulkarni, A. P., Govender, D. A., Kotwal, G. J. & Kellaway, L. A.  
924 Modulation of anxiety behavior by intranasally administered Vaccinia  
925 virus complement control protein and curcumin in a mouse model of  
926 Alzheimer's disease. *Current Alzheimer Research* **8**, 95–113 (2011).
- 927 35. Pozo-Rodríguez, A., Ollaranta, R., Skoog, J., Pekny, M. & Pekna, M.  
928 Hyperactive Behavior and Altered Brain Morphology in Adult Complement  
929 C3a Receptor Deficient Mice. *Front. Immunol.* **12**, 604812 (2021).
- 930 36. Fischer, M. B., Ma, M., Goerg, S., Zhou, X. & Xia, J. Regulation of the B  
931 cell response to T-dependent antigens by classical pathway complement.  
932 *J. Immunol.* **157**, 549–556, (1996).

- 933 37. Humbles, A. A. *et al.* A role for the C3a anaphylatoxin receptor in the  
934 effector phase of asthma. *Nature*, **406**, 998–1001 (2000).
- 935 38. Wang, Y. *et al.* A role for complement in antibody-mediated inflammation:  
936 C5-deficient DBA/1 mice are resistant to collagen-induced arthritis. *J.*  
937 *Immunol.* **164**, 4340–4347 (2000).
- 938 39. Mikaelsson, M. A., ncia, M. C. A., Dent, C. L., Wilkinson, L. S. & Humby,  
939 T. Placental programming of anxiety in adulthood revealed by Igf2-null  
940 models. *Nature Communications* **4**, 1–9 (2013).
- 941 40. Molewijk, H. E., van der Poel, A. M. & Olivier, B. The ambivalent  
942 behaviour ‘stretched approach posture’ in the rat as a paradigm to  
943 characterize anxiolytic drugs. *Psychopharmacology* **121**, 81–90  
944 41. Mackintosh, J. H. & Grant, E. C. A Comparison of the Social Postures of  
945 Some Common Laboratory Rodents. *Behaviour* **21**, 246–259 (1963).
- 946 42. Kleiber, M. Body size and metabolism. *Hilgardia Journal of Agricultural*  
947 *Science* **6**, 315–353 (1932).
- 948 43. Mikaelsson, M. A., Constância, M., Dent, C. L., Wilkinson, L. S. & Humby,  
949 T. Placental programming of anxiety in adulthood revealed by Igf2-null  
950 models. *Nature Communications* **4**, 2311 (2013).
- 951 44. Dickmeis, T. Glucocorticoids and the circadian clock. *Journal of*  
952 *Endocrinology* **200**, 3–22 (2008).
- 953 45. Livak, K. J. & Schmittgen, T. D. Analysis of Relative Gene Expression  
954 Data Using Real-Time Quantitative PCR and the 2- $\Delta\Delta$ CT Method.  
955 *Methods* **25**, 402–408 (2001).
- 956 46. Wright, S. P. Adjusted p-values for simultaneous inference. *Biometrics*  
957 **48**, 1005–1013 (1992).
- 958 47. Pellow, S., Chopin, P., File, S. E. & Briley, M. Validation of open : closed  
959 arm entries in an elevated plus-maze as a measure of anxiety in the rat.  
960 *J. Neurosci. Methods* **14**, 149–167 (1985).
- 961 48. Walf, A. A. & Frye, C. A. The use of the elevated plus maze as an assay  
962 of anxiety-related behavior in rodents. *Nat Protoc* **2**, 322–328 (2007).
- 963 49. Ennaceur, A. Tests of unconditioned anxiety - pitfalls and  
964 disappointments. *Physiology & Behavior* **135**, 55–71 (2014).
- 965 50. RODGERS, R. J. Anxiety, defence and the elevated plus-maze.  
966 *Pharmacology Biochemistry and Behaviour* (1997).
- 967 51. Braun, A. A., Skelton, M. R., Vorhees, C. V. & Williams, M. T.  
968 Comparison of the elevated plus and elevated zero mazes in treated and  
969 untreated male Sprague-Dawley rats: Effects of anxiolytic and anxiogenic  
970 agents. *Pharmacology Biochemistry and Behavior* **97**, 406–415 (2011).
- 971 52. Lopicard, E. M., Joubert, C., Hagneau, I., Perez-Diaz, F. & Chapouthier,  
972 G. Differences in anxiety-related behavior and response to diazepam in  
973 BALB/cByJ and C57BL/6J strains of mice. *Pharmacology Biochemistry*  
974 *and Behavior* **67**, 739–748 (2000).
- 975 53. Grewal, S. S., Sherperd, D, J. K., Bill, D. J., Fletcher, A. & Dourish, C. T.  
976 Behavioural and pharmacological characterisation of the canopy  
977 stretched attend posture test as a model of anxiety in mice and rats.  
978 *Psychopharmacology* **133**, 29–38 (1997).
- 979 54. Kaesermann, H. P. Stretched attend posture, a non-social form of  
980 ambivalence, is sensitive to a conflict-reducing drug action.  
981 *Psychopharmacology* **89**, 31–37

- 982 55. Albrechet-Souza, L., Cristina de Carvalho, M., Rodrigues Franci, C. &  
 983 Brandão, M. L. Increases in plasma corticosterone and stretched-attend  
 984 postures in rats naive and previously exposed to the elevated plus-maze  
 985 are sensitive to the anxiolytic-like effects of midazolam. *Hormones and*  
 986 *Behavior* **52**, 267–273 (2007).
- 987 56. Holt, D. J., Coombs, G., Zeidan, M. A., Goff, D. C. & Milad, M. R. Failure  
 988 of neural responses to safety cues in schizophrenia. *Arch Gen Psychiatry*  
 989 **69**, 893–903 (2012).
- 990 57. Grillon, C., Morgan, C. A., Southwick, S. M., Davis, M. & Charney, D. S.  
 991 Baseline startle amplitude and prepulse inhibition in Vietnam veterans  
 992 with posttraumatic stress disorder. *Psychiatry Research* **64**, 169–178  
 993 (1996).
- 994 58. Falls, W. A., Carlson, S., Turner, J. G. & Willott, J. F. Fear-potentiated  
 995 startle in two strains of inbred mice. *Behavioral Neuroscience* **111**, 855–  
 996 861 (1997).
- 997 59. Coulthard, L. G. *et al.* Complement C5aR1 Signaling Promotes  
 998 Polarization and Proliferation of Embryonic Neural Progenitor Cells  
 999 through PKC $\zeta$ . *J. Neurosci.* **37**, 5395–5407 (2017).
- 1000 60. Hawksworth, O. A., Coulthard, L. G., Taylor, S. M., Wolvetang, E. J. &  
 1001 Woodruff, T. M. Brief Report: Complement C5a Promotes Human  
 1002 Embryonic Stem Cell Pluripotency in the Absence of FGF2. *Stem Cells*,  
 1003 **32**, 3278-3284, (2014).
- 1004 61. Schafer, D. P. *et al.* Microglia sculpt postnatal neural circuits in an activity  
 1005 and complement-dependent manner. *Neuron* **74**, 691–705 (2012).
- 1006 62. Apps, R. & Strata, P. Neuronal circuits for fear and anxiety - the missing  
 1007 link. *Nat. Rev.* **16**, 642 (2015).
- 1008 63. Smith, K. S., Engin, E., Meloni, E. G. & Rudolph, U. Benzodiazepine-  
 1009 induced anxiolysis and reduction of conditioned fear are mediated by  
 1010 distinct GABAA receptor subtypes in mice. *Neuropharmacology* **63**, 250–  
 1011 258 (2012).
- 1012 64. Ahamed, J., Venkatesha, R. T., Thangam, E. B. & Ali, H. C3a Enhances  
 1013 Nerve Growth Factor-Induced NFAT Activation and Chemokine  
 1014 Production in a Human Mast Cell Line, HMC-1. *J. Immunol.* **172**, 6961–  
 1015 6968 (2004).
- 1016 65. Wu, F. *et al.* Complement component C3a plays a critical role in  
 1017 endothelial activation and leukocyte recruitment into the brain. *J*  
 1018 *Neuroinflammation* **13**, 23 (2016).
- 1019 66. Hamshere, M. L. *et al.* Genome-wide significant associations in  
 1020 schizophrenia to ITIH3&sol;4, CACNA1C and SDCCAG8, and extensive  
 1021 replication of associations reported by the Schizophrenia PGC. *Mol.*  
 1022 *Psychiatry* 1–5 (2019).
- 1023 67. Kabir, Z. D. *et al.* Rescue of impaired sociability and anxiety-like behavior  
 1024 in adult cacna1c-deficient mice by pharmacologically targeting eIF2 $\alpha$ .  
 1025 *Mol. Psychiatry* **22**, 1096–1109 (2017).
- 1026 68. Simms, B. A. & Zamponi, G. W. Neuronal Voltage-Gated Calcium  
 1027 Channels: Structure, Function, and Dysfunction. *Neuron* **82**, 24–45  
 1028 (2014).
- 1029 69. Chao, T. H. *et al.* Role of the second extracellular loop of human C3a  
 1030 receptor in agonist binding and receptor function. *Journal of Biological*  
 1031 *Chemistry* **274**, 9721–9728 (1999).



- 1032 70. Hannedouche, S. *et al.* Identification of the C3a Receptor (C3AR1) as the  
 1033 Target of the VGF-derived Peptide TLQP-21 in Rodent Cells. *Journal of*  
 1034 *Biological Chemistry* **288**, 27434–27443 (2013).
- 1035 71. Cero, C. *et al.* The TLQP-21 peptide activates the G-protein-coupled  
 1036 receptor C3aR1 via a folding-upon-binding mechanism. *Structure* **22**,  
 1037 1744–1753 (2014).
- 1038 72. Razzoli, M. *et al.* Implication of the VGF-derived peptide TLQP-21 in  
 1039 mouse acute and chronic stress responses. *Behav. Brain Res.* **229**, 333–  
 1040 339 (2012).
- 1041 73. van den Pol, A. N., Bina, K., Decavel, C. & Ghosh, P. VGF expression in  
 1042 the brain. *J. Comp. Neurol.* **347**, 455–469 (1994).
- 1043 74. Lewis, B., Francis, K., Gasque, P., Scanlon, M. & Ham, J. Functional  
 1044 complement C3a receptors in the rat pituitary gland. *Endocrine Abstracts*  
 1045 **3**, 198 (2002).
- 1046 75. Francis, K. Complement C3a receptors in the pituitary gland: a novel  
 1047 pathway by which an innate immune molecule releases hormones  
 1048 involved in the control of inflammation. *The FASEB Journal* 1–4 (2003).
- 1049 76. Coulthard, L. G., Hawksworth, O. A. & Woodruff, T. M. Complement: The  
 1050 Emerging Architect of the Developing Brain. *Trends Neurosci.* **41**, 373–  
 1051 384 (2018).
- 1052 77. Scholz, B. *et al.* The Regulation of Cytokine Networks in Hippocampal  
 1053 CA1 Differentiates Extinction from Those Required for the Maintenance  
 1054 of Contextual Fear Memory after Recall. *PLoS ONE* **11**, e0153102–29  
 1055 (2016).
- 1056 78. Ames, R. S. *et al.* Identification of a selective nonpeptide antagonist of  
 1057 the anaphylatoxin C3a receptor that demonstrates anti-inflammatory  
 1058 activity in animal models. *J. Immunol.* **166**, 6341–6348 (2001).
- 1059 79. Therien, A. G., Baelder, R. & Köhl, J. Agonist Activity of the Small  
 1060 Molecule C3aR Ligand SB 290157. *J. Immunol.* **174**, 7479–7480 (2005).
- 1061 80. Holly, K. S., Orndorff, C. O. & Murray, T. A. MATSAP: An automated  
 1062 analysis of stretch-attend posture in rodent behavioral experiments.  
 1063 *Scientific Reports* **6**, (2016).
- 1064 81. Genewsky, A. *et al.* How much fear is in anxiety? BioRxiv preprint  
 1065 doi:10.1101/385823
- 1066 82. Hong, S. *et al.* Complement and microglia mediate early synapse loss in  
 1067 Alzheimer mouse models. *Science* **352**, 712–716 (2016).
- 1068 83. Kopec, A. M., Smith, C. J., Ayre, N. R., Sweat, S. C. & Bilbo, S. D.  
 1069 Microglial dopamine receptor elimination defines sex-specific nucleus  
 1070 accumbens development and social behavior in adolescent rats. *Nature*  
 1071 *Communications* **9**, 3769 (2018).
- 1072 84. Zhang, J. *et al.* Microglial CR3 Activation Triggers Long-Term Synaptic  
 1073 Depression in the Hippocampus via NADPH Oxidase. *Neuron* **82**, 195–  
 1074 207 (2014).
- 1075 85. Roussos, P., Giakoumaki, S. G., Georgakopoulos, A., Robakis, N. K. &  
 1076 Bitsios, P. The CACNA1C and ANK3 risk alleles impact on affective  
 1077 personality traits and startle reactivity but not on cognition or gating in  
 1078 healthy males. *Bipolar Disorders* **13**, 250–259 (2011).
- 1079 86. Bader, P. L. *et al.* Mouse model of Timothy syndrome recapitulates triad  
 1080 of autistic traits. *Proc. Natl. Acad. Sci. U.S.A.* **108**, 15432–15437 (2011).

- 1081 87. Lee, A. S. *et al.* Forebrain elimination of cacna1c mediates anxiety-like  
1082 behavior in mice. *Nat.Neurosci* **17**, 1054–1055 (2012).
- 1083 88. Dao, D. T. *et al.* Mood Disorder Susceptibility Gene CACNA1C Modifies  
1084 Mood-Related Behaviors in Mice and Interacts with Sex to Influence  
1085 Behavior in Mice and Diagnosis in Humans. *Biological Psychiatry* **68**,  
1086 801–810 (2010).
- 1087 89. Dedic, N. *et al.* Cross-disorder risk gene CACNA1C differentially  
1088 modulates susceptibility to psychiatric disorders during development and  
1089 adulthood. *Nat.Neurosci* **23**, 533–543 (2018).
- 1090 90. Kim, M. *et al.* Brain gene co-expression networks link complement  
1091 signaling with convergent synaptic pathology in schizophrenia. *Nat*  
1092 *Neurosci* **24**, 799–809 (2021).
- 1093 91. Crider, A. *et al.* Complement component 3a receptor deficiency  
1094 attenuates chronic stress-induced monocyte infiltration and depressive-  
1095 like behavior. *Brain, Behavior, and Immunity* **70**, 246–256 (2018).
- 1096 92. Sellgren, C. M. *et al.* Increased synapse elimination by microglia in  
1097 schizophrenia patient-derived models of synaptic pruning. *Nat.Neurosci*  
1098 **22**, 1–385 (2019).  
1099
